# Supplementary material for: School-age outcomes of children after perinatal brain injury: a systematic review and meta-analysis
Source: PubMed Central journal article supplement (PMC10255042; doi:10.1136/bmjpo-2022-001810), 2023-06-02
Supplement: bmjpo-2022-001810supp001.pdf [file bmjpo-2022-001810supp001.pdf]

| <b>Supplement 1: databases searched</b>                                                              |
|------------------------------------------------------------------------------------------------------|
| Cochrane Central Register of Controlled Trials                                                       |
| EBSCO–CINAHL (Cumulative Index to Nursing and Allied Health Literature)                              |
| Google Scholar                                                                                       |
| Ovid–EMBASE                                                                                          |
| Ovid–MEDLINE                                                                                         |
| Ovid–MEDLINE E-pub ahead of print                                                                    |
| Ovid–MEDLINE In-Process and Other Non-Indexed Citations                                              |
| PubMed                                                                                               |
| Scopus                                                                                               |
| Web of Knowledge (Science Citation Index Expanded and Conference Proceedings Citation Index Science) |
