# Supplementary material for: School-age outcomes of children after perinatal brain injury: a systematic review and meta-analysis
Source: PubMed Central journal article supplement (PMC10255042; doi:10.1136/bmjpo-2022-001810), 2023-06-02
Supplement: bmjpo-2022-001810supp003.pdf [file bmjpo-2022-001810supp003.pdf]

| <b>Supplement 3: included studies of school-aged outcomes after perinatal brain injury</b>                                                                                                                                                                                                                                                                                                                                                                                                                                                                                                                                                                                                                                                                                                                                                                                                                                                                                                                                                                                                                                                                                                                                                                                                                                                                                                                   |                                                                         |                                                                                                                                                                                                                                                                                                                                                                                                                                                                                                                                                                                                                                                                                                             |                                                                                                                                                                                                                                                                                                                                                                                                                                                                                                                                                                                                                                                                          |                                                                                                                                                                                                                                                                                                                                                                                                                                                                                                                                                                                                                                                                                                                                                                                                                                                                                                                                                                              |
|--------------------------------------------------------------------------------------------------------------------------------------------------------------------------------------------------------------------------------------------------------------------------------------------------------------------------------------------------------------------------------------------------------------------------------------------------------------------------------------------------------------------------------------------------------------------------------------------------------------------------------------------------------------------------------------------------------------------------------------------------------------------------------------------------------------------------------------------------------------------------------------------------------------------------------------------------------------------------------------------------------------------------------------------------------------------------------------------------------------------------------------------------------------------------------------------------------------------------------------------------------------------------------------------------------------------------------------------------------------------------------------------------------------|-------------------------------------------------------------------------|-------------------------------------------------------------------------------------------------------------------------------------------------------------------------------------------------------------------------------------------------------------------------------------------------------------------------------------------------------------------------------------------------------------------------------------------------------------------------------------------------------------------------------------------------------------------------------------------------------------------------------------------------------------------------------------------------------------|--------------------------------------------------------------------------------------------------------------------------------------------------------------------------------------------------------------------------------------------------------------------------------------------------------------------------------------------------------------------------------------------------------------------------------------------------------------------------------------------------------------------------------------------------------------------------------------------------------------------------------------------------------------------------|------------------------------------------------------------------------------------------------------------------------------------------------------------------------------------------------------------------------------------------------------------------------------------------------------------------------------------------------------------------------------------------------------------------------------------------------------------------------------------------------------------------------------------------------------------------------------------------------------------------------------------------------------------------------------------------------------------------------------------------------------------------------------------------------------------------------------------------------------------------------------------------------------------------------------------------------------------------------------|
| * overlapping study data; Ω potential error in manuscript; Adjusted Odds Ratio (aOR); Autism spectrum Disorder (ASD); Attention Deficit Hyperactivity Disorder (ADHD); Bayley Scale of Infant Development (BSID); Child Behaviour Checklist (CBCL); Clinical Evaluation of Language Fundamentals (CELF); Cystic Periventricular leukomalacia (cPVL); Gross Motor Function Classification System, (GMFCS); Haemorrhagic parenchymal infarction (HPI); Hazard Ratio (HR); International Classification of Disease (ICD); Intraventricular haemorrhage (IVH); Intelligence Quotient (IQ); Kaufman Assessment Battery for Children (K-ABC); Mental Developmental Index (MDI); Peabody Picture Vocabulary Test (PPVT); Periventricular (PV); Periventricular leukomalacia (PVL); National Institute of Child Health and Human Development (NICHD); Neonatal Intensive Care Unit (NICU); Psychomotor Development Index (PDI); Retinopathy of Prematurity (ROP); Small for Gestational Age (SGA); Spontaneous Intestinal Perforation (SIP); Standard Deviation (SD); Standard Error (SE); Test of Motor Impairment (TOMI); Very low birthweight (VLBW); Visuomotor integration (VMI); Wechsler Abbreviated Scale of Intelligence (WASI); Wechsler Intelligence Scale for Children (WISC); Wechsler Preschool & Primary Scale of Intelligence (WPPSI); White Matter Injury (WMI); Wide Range Achievement Test (WRAT) |                                                                         |                                                                                                                                                                                                                                                                                                                                                                                                                                                                                                                                                                                                                                                                                                             |                                                                                                                                                                                                                                                                                                                                                                                                                                                                                                                                                                                                                                                                          |                                                                                                                                                                                                                                                                                                                                                                                                                                                                                                                                                                                                                                                                                                                                                                                                                                                                                                                                                                              |
|                                                                                                                                                                                                                                                                                                                                                                                                                                                                                                                                                                                                                                                                                                                                                                                                                                                                                                                                                                                                                                                                                                                                                                                                                                                                                                                                                                                                              | Author<br>Year<br>Country<br>Study type                                 | Population<br>Exposures<br>Comparator<br>Ascertainment/ definition                                                                                                                                                                                                                                                                                                                                                                                                                                                                                                                                                                                                                                          | Outcomes                                                                                                                                                                                                                                                                                                                                                                                                                                                                                                                                                                                                                                                                 | Main result(s)                                                                                                                                                                                                                                                                                                                                                                                                                                                                                                                                                                                                                                                                                                                                                                                                                                                                                                                                                               |
| 1                                                                                                                                                                                                                                                                                                                                                                                                                                                                                                                                                                                                                                                                                                                                                                                                                                                                                                                                                                                                                                                                                                                                                                                                                                                                                                                                                                                                            | Adant 2019 <sup>9</sup><br><br>Belgium<br><br>Retrospective cohort      | <p><b>Population</b></p> <ul style="list-style-type: none"> <li>Gestation ≤32 weeks with and without spontaneous intestinal perforation (SIP)</li> <li>Born 1994-2014</li> </ul> <p><b>Exposure (n=19)</b></p> <ul style="list-style-type: none"> <li>IVH grade 3-4</li> </ul> <p><b>Comparator (n=44)</b></p> <ul style="list-style-type: none"> <li>Matched on gender, gestational age, date of birth (multiples matched to sibling without SIP)</li> <li>No IVH</li> </ul> <p><b>Ascertainment/ definition</b></p> <ul style="list-style-type: none"> <li>Clinical record review</li> </ul>                                                                                                              | <p><b>Outcomes</b></p> <ul style="list-style-type: none"> <li>Functional disability (composite)</li> <li>Cognitive</li> <li>Motor</li> <li>Visual</li> <li>Behavioural/ mental health</li> <li>Wellbeing</li> <li>Quality of life</li> <li>Physical health</li> </ul> <p><b>Measurement/ assessment</b></p> <ul style="list-style-type: none"> <li>BSID II</li> <li>Telephone survey (parents)</li> <li>PedsQL</li> <li>IQ testing</li> </ul> <p><b>Follow-up</b></p> <ul style="list-style-type: none"> <li>67% follow-up at 7-11 months</li> <li>41% follow-up at 18-22 months</li> <li>49% follow-up at 4-10 years</li> <li>86% follow-up telephone survey</li> </ul> | <p><b>Outcomes of those with SIP compared to controls without SIP – by IVH subgroup</b></p> <p><b>Disability</b><br/>aOR 8.79 95%CI (1.72, 44.86)</p> <p><b>Multiple disabilities</b><br/>aOR 5.97 95%CI (1.61, 22.15)</p> <p><b>Cognitive</b><br/><b>Regular education system (not a special educational needs school)</b><br/>aOR 8.73 95%CI (2.1, 36.72)</p> <p><b>Visual outcomes (wearing glasses)</b><br/>aOR 0.474 95%CI (0.13, 1.69)</p> <p><b>Behavioural/ mental health disorder</b> (including attention problems, conduct problems and autism spectrum disorders)<br/>aOR 1.24 95%CI (0.32, 4.8)</p> <p><b>PedsQL low quality of life score</b><br/>aOR 0.87 95%CI (0.77, 0.99)</p> <p><b>PedsQL low physical health score</b><br/>aOR 0.82 95%CI (0.66, 1.01)</p>                                                                                                                                                                                               |
| 2*                                                                                                                                                                                                                                                                                                                                                                                                                                                                                                                                                                                                                                                                                                                                                                                                                                                                                                                                                                                                                                                                                                                                                                                                                                                                                                                                                                                                           | Beaino 2010 <sup>68</sup><br><br>France<br><br>Prospective cohort       | <p><b>Population</b></p> <ul style="list-style-type: none"> <li>Gestation &lt;33 weeks</li> <li>Born 1997</li> </ul> <p><b>Exposure</b></p> <ul style="list-style-type: none"> <li>IVH grade 1 (n=173)</li> <li>IVH grade 2 (n=117)</li> <li>IVH grade 3 (n=32)</li> <li>Intraparenchymal haemorrhage (IPH) (n=6)</li> <li>Persistent echodensities or ventricular dilatation (n=241)</li> <li>cPVL (n=66)</li> </ul> <p><b>Comparator (n=1153)</b></p> <ul style="list-style-type: none"> <li>Unmatched</li> <li>No IVH</li> </ul> <p><b>Ascertainment/ definition</b></p> <ul style="list-style-type: none"> <li>Ultrasound imaging undertaken and reviewed by neonatologists or radiographers</li> </ul> | <p><b>Outcomes</b></p> <ul style="list-style-type: none"> <li>Cerebral palsy</li> </ul> <p><b>Measurement/assessment</b></p> <ul style="list-style-type: none"> <li>Standardised questionnaires completed by physicians</li> </ul> <p><b>Follow-up</b></p> <ul style="list-style-type: none"> <li>5 years</li> <li>77% follow-up</li> </ul>                                                                                                                                                                                                                                                                                                                              | <p><b>Cerebral palsy</b><br/><b>Grade 3 IVH</b><br/>OR 3.75 95%CI (2.41–5.85)</p> <p><b>Grade 3 IVH or echodensities of ventricular dilatation</b><br/>Model A aOR 3.25 95%CI (2.02–5.22)<br/>Model B aOR 3.40 95%CI (2.07–5.60)<br/>Model C aOR 3.31 95%CI (2.00–5.48)</p> <p><b>cPVL</b><br/>OR 33.41 95%CI (19.25–57.96)</p> <p><b>Cystic PVL or IPH</b><br/>Model A aOR 29.66 95%CI (16.71–52.62)<br/>Model B aOR 28.41 95%CI (15.65–51.59)<br/>Model C n/a</p>                                                                                                                                                                                                                                                                                                                                                                                                                                                                                                          |
| 3                                                                                                                                                                                                                                                                                                                                                                                                                                                                                                                                                                                                                                                                                                                                                                                                                                                                                                                                                                                                                                                                                                                                                                                                                                                                                                                                                                                                            | Brouwer 2012 <sup>18</sup><br><br>Netherlands<br><br>Prospective cohort | <p><b>Population</b></p> <ul style="list-style-type: none"> <li>Gestation &lt;32 weeks</li> <li>Born 1999-2004</li> </ul> <p><b>Exposure (n=32)</b></p> <ul style="list-style-type: none"> <li>Post-haemorrhagic ventricular dilatation after IVH grade 3-4 requiring neurosurgical intervention</li> <li>No PVL</li> </ul> <p><b>Comparator (n=23)</b></p> <ul style="list-style-type: none"> <li>Matched on gestation, birthweight, and sex</li> <li>No IVH</li> </ul> <p><b>Ascertainment/ definition</b></p> <ul style="list-style-type: none"> <li>Ultrasound diagnosis</li> <li>Papile classification</li> </ul>                                                                                      | <p><b>Outcomes</b></p> <ul style="list-style-type: none"> <li>Motor</li> <li>Cerebral palsy</li> <li>Cognitive</li> <li>Behavioural</li> </ul> <p><b>Measurement/ assessment</b></p> <ul style="list-style-type: none"> <li>Movement ABC</li> <li>GMFCS</li> <li>WPPSI (3<sup>rd</sup> edition Dutch version)</li> <li>Revisie Amsterdamse Kinder Intelligentietest</li> <li>Snijders Oomen Nonverbal Intelligence Test 2.5-7 – Revised</li> <li>CBCL</li> <li>Teacher Report Form</li> </ul> <p><b>Follow-up</b></p> <ul style="list-style-type: none"> <li>4-8 years (median 5.7)</li> <li>97% follow-up</li> </ul>                                                    | <p><b>Cerebral palsy</b><br/>IVH grade 3 n=0<br/>IVH grade 4 n=8, 53%; all unilateral spastic cerebral palsy<br/>GMFCS level 1, n=5<br/>GMFCS level 2, n=2<br/>GMFCS level 3, n=1</p> <p><b>Movement ABC motor score (for those without cerebral palsy)</b><br/><b>Score &lt;p 5 (definite motor problems)</b><br/>IVH grade 3 n=6, 26%<br/>IVH grade 4 n=3, 13%<br/>No IVH n=0</p> <p><b>Score p 5-15 (borderline motor function)</b><br/>IVH grade 3 (n=6, 26%)<br/>IVH grade 4 (n=0, 0%)<br/>No IVH (n=5, 29.4%)</p> <p><b>Score &gt; 15</b><br/>IVH grade 3 n=6, 26%<br/>IVH grade 4 n=0, 0%<br/>No IVH n=12, 70.6%</p> <p><b>Cognition</b><br/><b>Wechsler intelligence test (mean ±SD)</b><br/><b>Verbal scale</b><br/>IVH n=23, 97±13<br/>IVH &lt;30weeks' gestation n=16, 94±13<br/>No IVH n=24, 96±13;</p> <p><b>Performance scale</b><br/>IVH, n=23, 94±16;<br/>IVH &lt;30weeks' gestation n=16, 93±15<br/>No IVH n=24, 103±14;</p> <p><b>Production scale</b></p> |

|   |                                                                        |                                                                                                                                                                                                                                                                                                                                                                                                                                                                                                                                                                                                                                                                             |                                                                                                                                                                                                                                                                                                                                                                                                                                                                                                                                                                                                                                                                          |                                                                                                                                                                                                                                                                                                                                                                                                                                                                                                                                                                                                                                                                                                                                                                                                                                                                                                                                                                                                                                                                                                                                                                                                                                                                                                                                                                                                                                                                                                                                                                                                                                                                                                                                                                                                                                     |
|---|------------------------------------------------------------------------|-----------------------------------------------------------------------------------------------------------------------------------------------------------------------------------------------------------------------------------------------------------------------------------------------------------------------------------------------------------------------------------------------------------------------------------------------------------------------------------------------------------------------------------------------------------------------------------------------------------------------------------------------------------------------------|--------------------------------------------------------------------------------------------------------------------------------------------------------------------------------------------------------------------------------------------------------------------------------------------------------------------------------------------------------------------------------------------------------------------------------------------------------------------------------------------------------------------------------------------------------------------------------------------------------------------------------------------------------------------------|-------------------------------------------------------------------------------------------------------------------------------------------------------------------------------------------------------------------------------------------------------------------------------------------------------------------------------------------------------------------------------------------------------------------------------------------------------------------------------------------------------------------------------------------------------------------------------------------------------------------------------------------------------------------------------------------------------------------------------------------------------------------------------------------------------------------------------------------------------------------------------------------------------------------------------------------------------------------------------------------------------------------------------------------------------------------------------------------------------------------------------------------------------------------------------------------------------------------------------------------------------------------------------------------------------------------------------------------------------------------------------------------------------------------------------------------------------------------------------------------------------------------------------------------------------------------------------------------------------------------------------------------------------------------------------------------------------------------------------------------------------------------------------------------------------------------------------------|
|   |                                                                        |                                                                                                                                                                                                                                                                                                                                                                                                                                                                                                                                                                                                                                                                             |                                                                                                                                                                                                                                                                                                                                                                                                                                                                                                                                                                                                                                                                          | <p>IVH n=23, 87±22;<br/>IVH &lt;30weeks' gestation n=16, 85±24<br/>No IVH n=24, 93±14</p> <p><b>Intelligence quotient (n: mean +/-SD)</b><br/>IVH grade 3 n=17; IQ 96±15;<br/>IQ&gt;85 n=13 (76.5%)</p> <p>IVH IV n=15; IQ 91±10;<br/>IQ &gt;85 n=9 (64.3%)</p> <p>IVH &lt;30 weeks' gestation n=23; IQ 92±17;<br/>IQ&gt;85 n=15 (65.2%)</p> <p>No IVH n=23; IQ 98±15,<br/>IQ&gt;85 n=17 (74%)</p> <p><b>Behavioural outcomes</b><br/><b>CBCL parental score: mean T score ±SD, n in subclinical range (%)</b><br/><b>Total scale</b><br/>IVH n=26: 48.2 ±8.4, n=3 (12%)<br/>IVH &lt;30 weeks' gestation n=20: 46.9 ±8.3, n=2 (10%)<br/>No IVH &lt;30 weeks' gestation n=23: 44.3 ±7.8, n=1 (4%)</p> <p><b>Internalising problem scale</b><br/>IVH: 49.2 ±8.9, n=5 (19%)<br/>IVH &lt;30 weeks' gestation: 28.2 ±8.4, n=3 (15%)<br/>No IVH &lt;30 weeks' gestation: 49.2 ±9.1, n=5 (21%)</p> <p><b>Externalizing problem scale</b><br/>IVH: 46.8 ±9.4, n=2 (8%)<br/>IVH &lt;30 weeks' gestation: 45.1 ±9.5, n=1 (15%)<br/>No IVH &lt;30weeks' gestation: 43.7 ±7.5, n=0 (0%)</p> <p><b>TRF teachers score: mean T score ±SD, n in subclinical range (%)</b><br/><b>Total scale</b><br/>IVH n=25: 54.7 ±8.7, n=6 (24%)<br/>IVH &lt;30 weeks' gestation n=19: 53.9 ±9.0, n=4 (21%)<br/>No IVH &lt;30 weeks' gestation n=22: 50.9 ±9.8, n=4 (18%)</p> <p><b>Internalising problem scale</b><br/>IVH: 53.2 ±10.8, 4 (16%)<br/>IVH &lt;30 weeks' gestation: 52.2 ±11.7, n=3 (16%)<br/>No IVH &lt;30 weeks' gestation: 52.4 ±11.4, n=7 (32%)</p> <p><b>Externalizing problem scale</b><br/>IVH: 54.3 ±6.7, 3 (12%)<br/>IVH &lt;30 weeks' gestation: 54.1 ±7.0, n=2 (11%)<br/>No IVH &lt;30 weeks' gestation: 49.7 ±7.7, n=2 (9%)</p> <p>N=13 (41%) had repeated a school class, had educational help and/or attended special education</p> |
| 4 | <p>Campbell 2021<sup>10</sup><br/>USA<br/>Prospective cohort study</p> | <p><b>Population (n=858)</b></p> <ul style="list-style-type: none"> <li>Gestation 23-27 weeks</li> <li>Born 2002-2004</li> </ul> <p><b>Exposure</b></p> <ul style="list-style-type: none"> <li>IVH without WMI (n=124)</li> <li>WMI without IVH (n=30)</li> <li>IVH and WMI (n=63)</li> </ul> <p><b>Comparator (n=641)</b></p> <ul style="list-style-type: none"> <li>Unmatched</li> <li>No IVH or WMI</li> </ul> <p><b>Ascertainment/ definition</b></p> <ul style="list-style-type: none"> <li>Ultrasound imaging reviewed by two independent blinded radiologists</li> <li>WMI: parenchymal echolucency or moderate to severe ventriculomegaly on a late scan</li> </ul> | <p><b>Outcomes</b></p> <ul style="list-style-type: none"> <li>Neurocognitive development (composite)</li> <li>Cognitive</li> <li>Cerebral palsy</li> <li>Behavioural/ mental health</li> <li>Epilepsy</li> <li>Quality of life</li> </ul> <p><b>Measurement/ assessment</b></p> <ul style="list-style-type: none"> <li>Differential Ability Scale II</li> <li>NEPSY II</li> <li>Neurological exam</li> <li>GMFCS</li> <li>Parental questionnaire</li> <li>Social Communication Questionnaire</li> <li>Child Symptom Inventory 4</li> <li>Peds QoL 4</li> </ul> <p><b>Follow up</b></p> <ul style="list-style-type: none"> <li>10 years</li> <li>74% follow-up</li> </ul> | <p><b>Neurodevelopmental burden</b></p> <p><b>No impairments</b><br/>IVH and WMI n=24, 38%<br/>WMI n=12, 40%<br/>IVH n= 86, 69%<br/>No IVH or WMI n=487, 76%</p> <p><b>No cognitive impairment; 1 or more of cerebral palsy, ASD, or epilepsy</b><br/>IVH and WMI n=4, 6%<br/>WMI n=4, 13%<br/>IVH n=7, 6%<br/>No IVH or WMI n=26, 4%</p> <p><b>Cognitive</b><br/><b>Normal cognitive function</b><br/>IVH and WMI n=8, 13%<br/>WMI n=5, 17%<br/>IVH n=41, 33%<br/>No IVH or WMI n=235, 37%</p> <p><b>Cognitive impairment (moderate to severe)</b><br/><b>IVH and WMI</b><br/>n=35, 56%<br/>OR 5.01 95% CI (2.94, 8.54)<br/>aOR 4.49 95% CI (2.49, 8.11)</p> <p><b>WMI</b><br/>n=14, 47%<br/>OR 3.51 95% CI (1.67, 7.37)<br/>aOR 5.07 95% CI (2.13, 12.02)</p> <p><b>IVH</b><br/>n=31, 25%<br/>OR 1.34 95% CI (0.85, 2.1)<br/>aOR 1.21 95% CI (0.73, 1.98)</p> <p><b>No IVH or WMI</b><br/>n=128, 20%<br/>Reference category</p> <p><b>Low cognitive function</b><br/>IVH and WMI n=18, 30%<br/>WMI n=10, 34%<br/>IVH n=50, 41%<br/>No IVH or WMI n=269, 43%</p> <p><b>Moderate cognitive impairment</b><br/>IVH and WMI n=17, 28%</p>                                                                                                                                                                                                                                                                                                                                                                                                                                                                                                                                                                                                                                                                                             |

|  |  |  |  |                                                                                                                                                                                                                                                                                                                                                                                                                                                                                                                                                                                                                                                                                                                                                                                                                                                                                                                                                                                                                                                                                                                                                                                                                                                                                                                                                                                                                                                                                                                                                                                                                                                                                                                                                                                                                                                                                                                                                                                                                                                                                                                                               |
|--|--|--|--|-----------------------------------------------------------------------------------------------------------------------------------------------------------------------------------------------------------------------------------------------------------------------------------------------------------------------------------------------------------------------------------------------------------------------------------------------------------------------------------------------------------------------------------------------------------------------------------------------------------------------------------------------------------------------------------------------------------------------------------------------------------------------------------------------------------------------------------------------------------------------------------------------------------------------------------------------------------------------------------------------------------------------------------------------------------------------------------------------------------------------------------------------------------------------------------------------------------------------------------------------------------------------------------------------------------------------------------------------------------------------------------------------------------------------------------------------------------------------------------------------------------------------------------------------------------------------------------------------------------------------------------------------------------------------------------------------------------------------------------------------------------------------------------------------------------------------------------------------------------------------------------------------------------------------------------------------------------------------------------------------------------------------------------------------------------------------------------------------------------------------------------------------|
|  |  |  |  | <p>WMI n=7, 24%<br/>IVH n=24, 20%<br/>No IVH or WMI n=93, 15%</p> <p><b>Severe cognitive impairment</b><br/>IVH and WMI n=18, 30%<br/>WMI n=7, 24%<br/>IVH n=7, 6%<br/>No IVH or WMI n=35, 6%</p> <p><b>Nonverbal IQ</b><br/><b>IVH vs. No IVH or WMI</b><br/>Crude mean difference -3 95%CI (-6.6, 0.6)</p> <p><b>Full scale IQ</b><br/><b>IVH vs No IVH or WMI</b><br/>Crude mean difference -2.2 95%CI (-5.7, 1.4)</p> <p><b>Cerebral palsy</b><br/><b>IVH and WMI</b><br/>n=32, 51%<br/>OR 16.85 95% CI (9.29, 30.55)<br/>aOR 13.43 95% CI (7, 25.78)</p> <p><b>WMI</b><br/>n=14, 47%<br/>OR 14.28 95% CI (6.48, 41.48)<br/>aOR 18.63 95% CI (7.37, 47.06)</p> <p><b>IVH</b><br/>n=9, 7%<br/>OR 1.28 95% CI (0.6, 2.72)<br/>aOR 1.19 95% CI (0.54, 2.61)</p> <p><b>No IVH or WMI</b><br/>n=37, 6%<br/>Reference category</p> <p><b>GMFCS&gt;0</b><br/>IVH and WMI n=16, 25%<br/>WMI n=10, 33%<br/>IVH n=4, 3%<br/>No IVH or WMI n=13, 2%</p> <p><b>Epilepsy</b><br/><b>IVH and WMI</b><br/>n=12, 19%<br/>OR 5.44 95 % CI (2.72, 10.86)<br/>aOR 4.89 95% CI (2.31, 10.35)</p> <p><b>WMI</b><br/>n=8, 27%;<br/>OR 6.92 95% CI (2.86, 16.75)<br/>aOR 7.56 95% CI (2.85, 20.06)</p> <p><b>IVH</b><br/>n= 11, 9%;<br/>OR 1.85 95% CI (0.91, 3.78)<br/>aOR 1.5 95% CI (0.68, 3.3)</p> <p><b>No IVH or WMI</b><br/>n=25, 4%<br/>Reference category</p> <p><b>Neuropsychiatric/ behavioural outcomes</b></p> <p><b>ASD</b><br/><b>IVH and WMI</b><br/>n=4, 6%<br/>OR 0.97 95% CI (0.34, 2.79)<br/>aOR 0.58 95% CI (0.19, 1.77)</p> <p><b>WMI</b><br/>n=2, 7%<br/>OR 1.02 95% CI (0.23, 4.42)<br/>aOR 0.74 95% CI (0.09, 5.88)</p> <p><b>IVH</b><br/>n=11, 9%<br/>OR 1.39 95% CI (0.69, 2.78)<br/>aOR 1.24 95% CI (0.59, 2.6)</p> <p><b>No IVH or WMI</b><br/>n=42, 7%<br/>Reference category</p> <p><b>Social responsiveness scale</b> (over 65 among children with IQ &gt;85 excluding those with ASD)<br/>IVH and WMI n=5, 8%<br/>WMI n=4, 13%<br/>IVH n=14, 11%<br/>No IVH or WMI n=62, 10%</p> <p><b>ADHD</b><br/>IVH and WMI n=13, 24%<br/>WMI n=3, 10%</p> <p>IVH n=31, 25%<br/>OR 1.6 95% CI (1.1, 2.5)</p> <p>No IVH or WMI n=97, 15%</p> |
|--|--|--|--|-----------------------------------------------------------------------------------------------------------------------------------------------------------------------------------------------------------------------------------------------------------------------------------------------------------------------------------------------------------------------------------------------------------------------------------------------------------------------------------------------------------------------------------------------------------------------------------------------------------------------------------------------------------------------------------------------------------------------------------------------------------------------------------------------------------------------------------------------------------------------------------------------------------------------------------------------------------------------------------------------------------------------------------------------------------------------------------------------------------------------------------------------------------------------------------------------------------------------------------------------------------------------------------------------------------------------------------------------------------------------------------------------------------------------------------------------------------------------------------------------------------------------------------------------------------------------------------------------------------------------------------------------------------------------------------------------------------------------------------------------------------------------------------------------------------------------------------------------------------------------------------------------------------------------------------------------------------------------------------------------------------------------------------------------------------------------------------------------------------------------------------------------|

|   |                                                                                |                                                                                                                                                                                                                                                                                                                                                                                                                                                                                                                                                                                                                                                                                                                                                              |                                                                                                                                                                                                                                                                                                                                                                                                                                                                                                                                                                                                                                                                                           |                                                                                                                                                                                                                                                                                                                                                                                                                                                                                                                                                                                                                                                                                 |
|---|--------------------------------------------------------------------------------|--------------------------------------------------------------------------------------------------------------------------------------------------------------------------------------------------------------------------------------------------------------------------------------------------------------------------------------------------------------------------------------------------------------------------------------------------------------------------------------------------------------------------------------------------------------------------------------------------------------------------------------------------------------------------------------------------------------------------------------------------------------|-------------------------------------------------------------------------------------------------------------------------------------------------------------------------------------------------------------------------------------------------------------------------------------------------------------------------------------------------------------------------------------------------------------------------------------------------------------------------------------------------------------------------------------------------------------------------------------------------------------------------------------------------------------------------------------------|---------------------------------------------------------------------------------------------------------------------------------------------------------------------------------------------------------------------------------------------------------------------------------------------------------------------------------------------------------------------------------------------------------------------------------------------------------------------------------------------------------------------------------------------------------------------------------------------------------------------------------------------------------------------------------|
|   |                                                                                |                                                                                                                                                                                                                                                                                                                                                                                                                                                                                                                                                                                                                                                                                                                                                              |                                                                                                                                                                                                                                                                                                                                                                                                                                                                                                                                                                                                                                                                                           | <p><b>Anxiety (parent-reported)</b><br/>IVH and WMI n=6, 10%<br/>WMI n=3, 10%<br/>IVH n=10, 8%<br/>No IVH or WMI n=98, 15%</p> <p><b>Anxiety (teacher-reported)</b><br/>IVH and WMI n=12, 19%<br/>WMI n=3, 10%<br/>IVH n=14, 11%<br/>No IVH or WMI n=88, 14%</p> <p><b>Depression (parent-reported)</b><br/>IVH and WMI n=7, 11%<br/>WMI n=7, 23%<br/>IVH n=14, 11%<br/>No IVH or WMI n=100, 16%</p> <p><b>Depression (teacher-reported)</b><br/>IVH and WMI n=20, 32%<br/>WMI n=7 23%<br/>IVH n=18, 15%<br/>No IVH or WMI n=96, 15%</p> <p><b>Poor quality of life (&lt;70)</b><br/>IVH and WMI n=31, 49%<br/>WMI n=12, 40%<br/>IVH n=41, 25%<br/>No IVH or WMI n=131, 20%</p> |
| 5 | Cheong 2018 <sup>11</sup><br>Australia<br><br>Three prospective cohort studies | <p><b>Population</b></p> <ul style="list-style-type: none"> <li>Gestation 22-27 weeks</li> <li>Born 1991-1992; 1997-1998; 2005-2006</li> </ul> <p><b>Exposure</b></p> <ul style="list-style-type: none"> <li>IVH grade 3-4 (n=100)</li> <li>cPVL (n=38)</li> </ul> <p><b>Comparator</b></p> <ul style="list-style-type: none"> <li>Unmatched</li> <li>No IVH grade 3-4 (n=446)</li> <li>No cPVL (n=508)</li> </ul> <p><b>Ascertainment/ definition</b></p> <ul style="list-style-type: none"> <li>Not specified</li> </ul>                                                                                                                                                                                                                                   | <p><b>Outcomes</b></p> <ul style="list-style-type: none"> <li>Survival with major disability (composite)</li> <li>Survival without major disability (composite)</li> <li>Cognitive</li> <li>Cerebral palsy</li> <li>Visual impairment (acuity less than 6/60 in better eye)</li> <li>Hearing impairment (requiring hearing aid or cochlear amplification)</li> </ul> <p><b>Assessment/ measurement</b></p> <ul style="list-style-type: none"> <li>GMFCS</li> <li>WISC III</li> <li>WISC IV</li> <li>Differential Abilities Scales 2<sup>nd</sup> edition</li> </ul> <p><b>Follow-up</b></p> <ul style="list-style-type: none"> <li>8 years</li> <li>91% follow-up of survivors</li> </ul> | <p><b>Survival with major disability</b></p> <p><b>IVH grade 3-4</b><br/>OR 2.98 95% CI (1.34, 6.63) p=0.01<br/>aOR 2.61 95%CI (1.11-6.15) p=0.028</p> <p>1997 and 2005 cohort only:<br/>OR 4.01 95% CI (1.25, 12.84) p=0.02</p> <p><b>cPVL</b><br/>OR 8.11 95% CI (3.24, 20.30) p&lt;0.001<br/>aOR 9.17 95% CI (3.57-23.53) p&lt;0.0001</p> <p>1997 and 2005 cohort only<br/>OR 17.0 95% CI (4.19, 69.02) p&lt;0.001</p>                                                                                                                                                                                                                                                       |
| 6 | Chou 2020 <sup>99</sup><br>Taiwan<br><br>Retrospective cohort study            | <p><b>Population</b></p> <ul style="list-style-type: none"> <li>Preterm infants &lt;37 weeks' gestation (n=21,474)</li> <li>Infants born small for gestational age (n=2206)</li> <li>Born 2000-2010</li> </ul> <p><b>Exposure</b></p> <ul style="list-style-type: none"> <li>Preterm with cerebral haemorrhage</li> <li>SGA with cerebral haemorrhage</li> </ul> <p><b>Comparator (n=94,720)</b></p> <ul style="list-style-type: none"> <li>Matched 1:4 on gender, urbanisation of residential area and parental occupation</li> <li>No cerebral haemorrhage</li> </ul> <p><b>Ascertainment/ definition</b></p> <ul style="list-style-type: none"> <li>National children's medical record database</li> <li>ICD 9 codes</li> </ul>                           | <p><b>Outcome</b></p> <ul style="list-style-type: none"> <li>Epilepsy</li> </ul> <p><b>Assessment/ measurement</b></p> <ul style="list-style-type: none"> <li>ICD 9</li> </ul> <p><b>Follow-up</b></p> <ul style="list-style-type: none"> <li>2-12 years (mean 9 years)</li> <li>Completeness of follow-up not specified</li> </ul>                                                                                                                                                                                                                                                                                                                                                       | <p><b>Epilepsy</b></p> <p><b>Preterm with cerebral haemorrhage</b><br/>HR 42.4 95%CI (29.8, 60.3)<br/>aHR 42.5 95%CI (29.6, 60.5)</p> <p><b>SGA with cerebral haemorrhage</b><br/>HR 39.3 95%CI (5.51, 274.5)<br/>aHR 38.7 95%CI (5.43, 275.5)</p>                                                                                                                                                                                                                                                                                                                                                                                                                              |
| 7 | Davidovitch 2020 <sup>99</sup><br>Israel<br><br>Retrospective cohort study     | <p><b>Population (n=4963)</b></p> <ul style="list-style-type: none"> <li>VLBW infants ≤1500g</li> <li>Born 1999-2012</li> </ul> <p><b>Exposure</b></p> <ul style="list-style-type: none"> <li>IVH grade 3-4 (n=256)</li> <li>PVL (n=200)</li> <li>Post-haemorrhagic hydrocephalus (n=152)</li> </ul> <p><b>Comparator</b></p> <ul style="list-style-type: none"> <li>Unmatched</li> <li>No IVH grade 3-4 (n=4600)</li> <li>No PVL (n=3813)</li> <li>No post-haemorrhagic hydrocephalus (n=4810)</li> </ul> <p><b>Ascertainment/ definition</b></p> <ul style="list-style-type: none"> <li>Israel national very low birthweight infant database linked to electronic medical records.</li> <li>Ultrasound diagnosis</li> <li>Papile classification</li> </ul> | <p><b>Outcome</b></p> <ul style="list-style-type: none"> <li>ASD</li> </ul> <p><b>Assessment/ measurement</b></p> <ul style="list-style-type: none"> <li>Physical, neurological, and developmental assessment (by a qualified healthcare professional)</li> <li>Independent psychological assessment</li> </ul> <p><b>Follow-up</b></p> <ul style="list-style-type: none"> <li>8- 15 years (median 11.6)</li> <li>Only those linked to electronic medical records included</li> </ul>                                                                                                                                                                                                     | <p><b>ASD</b><br/>IVH n=10, 3.9%<br/>No IVH n=103, 2.2% p=0.085</p> <p>PVL n=5, 2.5%<br/>No PVL n=88, 2.3% p=0.86</p> <p>Post-haemorrhagic hydrocephalus n=7, 4.6%<br/>No post-haemorrhagic hydrocephalus n=106, 2.2% p=0.051</p> <p>IVH, PVL, post-haemorrhagic hydrocephalus or ROP n=27.23.9%<br/>No brain injury n=571, 11.8% p&lt;0.0001<br/>aOR 1.62 95% CI (0.96-2.73)</p>                                                                                                                                                                                                                                                                                               |
| 8 | Doyle 2000 <sup>10</sup><br>Australia                                          | <p><b>Population</b></p> <ul style="list-style-type: none"> <li>Birthweight 500-1499 g</li> <li>Born 1980-1981; 1992</li> </ul>                                                                                                                                                                                                                                                                                                                                                                                                                                                                                                                                                                                                                              | <p><b>Outcomes</b></p> <ul style="list-style-type: none"> <li>Survival</li> <li>Cerebral palsy</li> </ul>                                                                                                                                                                                                                                                                                                                                                                                                                                                                                                                                                                                 | <p><b>Cerebral Palsy</b></p> <p>Grade of IVH</p>                                                                                                                                                                                                                                                                                                                                                                                                                                                                                                                                                                                                                                |

|   |                                                         |                                                                                                                                                                                                                                                                                                                                                                                                                                                                                                                                                                                                                                                                                                                                                                                                                                                                                                                                                                                                                                                                                                                                                                                                                                                                                                                                                                                                                                                                                                                                                                                                                                                     |                                                                                                                                                                                                                                                                                                                                                                                                                                                                                                                                                             |                                                                                                                                                                                                                                                                                                                                                                                                                                                                                                                                                                                                                                                                                                                                                                                                                                                                                                                                                                                                                                                                                                                                                                                                                                                                                                                                                                                                                                                                                                                                                                                                                                                                                                                                                                                                                                                                                                                                                                                                                                                                                                                                                                                                                                                                                                                                                                                                                                                                                                              |
|---|---------------------------------------------------------|-----------------------------------------------------------------------------------------------------------------------------------------------------------------------------------------------------------------------------------------------------------------------------------------------------------------------------------------------------------------------------------------------------------------------------------------------------------------------------------------------------------------------------------------------------------------------------------------------------------------------------------------------------------------------------------------------------------------------------------------------------------------------------------------------------------------------------------------------------------------------------------------------------------------------------------------------------------------------------------------------------------------------------------------------------------------------------------------------------------------------------------------------------------------------------------------------------------------------------------------------------------------------------------------------------------------------------------------------------------------------------------------------------------------------------------------------------------------------------------------------------------------------------------------------------------------------------------------------------------------------------------------------------|-------------------------------------------------------------------------------------------------------------------------------------------------------------------------------------------------------------------------------------------------------------------------------------------------------------------------------------------------------------------------------------------------------------------------------------------------------------------------------------------------------------------------------------------------------------|--------------------------------------------------------------------------------------------------------------------------------------------------------------------------------------------------------------------------------------------------------------------------------------------------------------------------------------------------------------------------------------------------------------------------------------------------------------------------------------------------------------------------------------------------------------------------------------------------------------------------------------------------------------------------------------------------------------------------------------------------------------------------------------------------------------------------------------------------------------------------------------------------------------------------------------------------------------------------------------------------------------------------------------------------------------------------------------------------------------------------------------------------------------------------------------------------------------------------------------------------------------------------------------------------------------------------------------------------------------------------------------------------------------------------------------------------------------------------------------------------------------------------------------------------------------------------------------------------------------------------------------------------------------------------------------------------------------------------------------------------------------------------------------------------------------------------------------------------------------------------------------------------------------------------------------------------------------------------------------------------------------------------------------------------------------------------------------------------------------------------------------------------------------------------------------------------------------------------------------------------------------------------------------------------------------------------------------------------------------------------------------------------------------------------------------------------------------------------------------------------------------|
|   | Prospective Cohort                                      | <p><b>Exposure</b></p> <p><b>1980s epoch</b></p> <ul style="list-style-type: none"> <li>IVH grade 1 (n=18)</li> <li>IVH grade 2 (n=9)</li> <li>IVH grade 3 (n=7)</li> <li>IVH grade 4 (n=4)</li> </ul> <p><b>1992 epoch</b></p> <ul style="list-style-type: none"> <li>IVH grade 1 (n=23)</li> <li>IVH grade 2 (n=10)</li> <li>IVH grade 3 (n=9)</li> <li>IVH grade 4 (n=1)</li> </ul> <p><b>Comparator</b></p> <ul style="list-style-type: none"> <li>Unmatched</li> <li>No intracranial haemorrhage (n=223)</li> <li>1980s epoch (n=110)</li> <li>1992 epoch (n=113)</li> </ul> <p><b>Ascertainment/ definition</b></p> <ul style="list-style-type: none"> <li>Ultrasound imaging</li> <li>Post-mortem examination</li> <li>Papile classification</li> </ul>                                                                                                                                                                                                                                                                                                                                                                                                                                                                                                                                                                                                                                                                                                                                                                                                                                                                                      | <p><b>Measurement/assessment</b></p> <ul style="list-style-type: none"> <li>Clinical assessment by blinded paediatricians</li> <li>Functional assessment</li> </ul> <p><b>Follow-up</b></p> <ul style="list-style-type: none"> <li>5 years</li> <li>93% follow-up for 1980s epoch</li> <li>94% follow-up for 1992 epoch</li> </ul>                                                                                                                                                                                                                          | <p><b>1980s epoch</b></p> <p>No IVH n=5, 5%</p> <p>IVH grade 3 n=2, 29%</p> <p>IVH grade 4 n=0</p> <p><b>1992s epoch</b></p> <p>No IVH n=4, 4%</p> <p>IVH grade 3 n=3, 33%</p> <p>IVH grade 4 n=1, 100%</p>                                                                                                                                                                                                                                                                                                                                                                                                                                                                                                                                                                                                                                                                                                                                                                                                                                                                                                                                                                                                                                                                                                                                                                                                                                                                                                                                                                                                                                                                                                                                                                                                                                                                                                                                                                                                                                                                                                                                                                                                                                                                                                                                                                                                                                                                                                  |
| 9 | Hintz 2018 <sup>17</sup><br>USA<br>Retrospective cohort | <p><b>Population</b></p> <ul style="list-style-type: none"> <li>Gestation 24-28 weeks</li> <li>Born 2005-2009</li> </ul> <p><b>Exposure</b></p> <p><b>MRI</b></p> <ul style="list-style-type: none"> <li>Mild WMI (n=223)</li> <li>Moderate WMI (n=51)</li> <li>Severe WMI (n=15)</li> </ul> <ul style="list-style-type: none"> <li>Any cerebellar lesion (n=57)</li> <li>Significant cerebellar lesion (n=39)</li> </ul> <p><b>Early cranial ultrasound</b></p> <ul style="list-style-type: none"> <li>No IVH 3-4 or cPVL (n=341)</li> <li>IVH 3-4 or cPVL (n=32)</li> </ul> <p><b>Late cranial ultrasound</b></p> <ul style="list-style-type: none"> <li>No porencephalic cyst, cPVL, moderate to severe ventricular enlargement or shunt (n=354)</li> <li>Porencephalic cyst, cPVL, moderate to severe ventricular enlargement or shunt (n=19)</li> </ul> <p><b>Comparator</b></p> <ul style="list-style-type: none"> <li>No white matter injury on MRI (n=84)</li> <li>No cerebellar lesion on MRI (n=316)</li> <li>No IVH 3-4 or cPVL (n=32)</li> <li>Normal early cranial ultrasound (n=227)</li> <li>No porencephalic cyst, cPVL moderate to severe ventricular enlargement or shunt (n=19)</li> <li>Normal late cranial ultrasound (n=284)</li> </ul> <p><b>Ascertainment/ definition</b></p> <ul style="list-style-type: none"> <li>NICHD neonatal research network (NEURO study and SUPPORT cohort)</li> <li>Two masked central imaging readers for all cranial ultrasounds and one for MRI</li> <li>All had cranial ultrasound and MRI (at 35-42 weeks)</li> <li>Unilateral and bilateral cranial ultrasound lesions combined</li> </ul> | <p><b>Outcomes</b></p> <ul style="list-style-type: none"> <li>Moderate to severe disability (composite)</li> <li>Minimal or no disability</li> <li>Cognitive</li> <li>Cerebral palsy</li> <li>Hearing</li> <li>Vision</li> </ul> <p><b>Measurement/ assessment</b></p> <ul style="list-style-type: none"> <li>WISC IV</li> <li>Neurological exam</li> <li>GMFCS</li> <li>Clinical examination</li> <li>Parental report</li> </ul> <p><b>Follow-up</b></p> <ul style="list-style-type: none"> <li>6-7 years</li> <li>83.3% follow-up of survivors</li> </ul> | <p><b>White matter injury</b></p> <p><b>Moderate to severe disability</b></p> <p>No white matter injury, n=8, 9%</p> <p>Mild white matter injury, n=27, 12%</p> <p>Moderate white matter injury, n=8, 15%</p> <p>Severe white matter injury, n=14, 82%</p> <p>p&lt;0.0001</p> <p>Moderate or severe white matter injury<br/>aOR 1.1 95% CI (0.42, 2.92)</p> <p><b>Minimal or no disability</b></p> <p>No white matter injury, n=47, 55%</p> <p>Mild white matter injury, n=88, 224%</p> <p>Moderate white matter injury, n=15, 28%</p> <p>Severe white matter injury, n=0, 0%</p> <p>p&lt;0.0001</p> <p><b>Cognitive impairment (FSIQ mean (SD))</b></p> <p>No white matter injury, 90.1 (15.5)</p> <p>Mild white matter injury, 85.9 (16.8)</p> <p>Moderate white matter injury, 84 (17)</p> <p>Severe white matter injury, 62.7 (19.6)</p> <p>p&lt;0.0001</p> <p><b>Cognitive impairment FSIQ &lt;70</b></p> <p>No white matter injury, n=7, 8%</p> <p>Mild white matter injury, n=25, 11%</p> <p>Moderate white matter injury, n=6, 12%</p> <p>Severe white matter injury, n=9, 60%</p> <p>p&lt;0.0001</p> <p>Moderate or severe white matter injury<br/>aOR 1.14 95% CI (0.39, 3.26)</p> <p><b>Cognitive impairment FSIQ &lt;85</b></p> <p>No white matter injury, n=27, 32%</p> <p>Mild white matter injury, n=100, 45%</p> <p>Moderate white matter injury, n=29, 57%</p> <p>Severe white matter injury, n=13, 87%</p> <p>p&lt;0.0001</p> <p><b>No cognitive impairment FSIQ ≥85</b></p> <p>No white matter injury, n=57, 68%</p> <p>Mild white matter injury, n=123, 55%</p> <p>Moderate white matter injury, n=22, 43%</p> <p>Severe white matter injury, n=2, 13%</p> <p>p&lt;0.0001</p> <p><b>Any cerebral palsy</b></p> <p>No white matter injury, n=2, 2%</p> <p>Mild white matter injury, n=6, 3%</p> <p>Moderate white matter injury, n=4, 7%</p> <p>Severe white matter injury, n=10, 59%</p> <p>p&lt;0.0001</p> <p><b>Cerebral palsy with GMFCS ≥2</b></p> <p>No white matter injury, n=0, 0%</p> <p>Mild white matter injury, n=1, 0%</p> <p>Moderate white matter injury, n=1, 2%</p> <p>Severe white matter injury, n=4, 24%</p> <p>p&lt;0.0001</p> <p><b>Cerebellar lesions</b></p> <p><b>Moderate to severe disability</b></p> <p>No cerebellar lesion, n=37, 12%</p> <p>Any cerebellar lesion, n=20, 33% p&lt;0.0001</p> <p>Significant cerebellar lesion, n=15, 36%</p> <p>Significant cerebellar lesions<br/>aOR 2.71 95% CI (1.09, 6.71)</p> <p><b>Minimal or no disability</b></p> |

|  |  |  |  |                                                                                                                                                                                                                                                                                                                                                                                                                                                                                                                                                                                                                                                                                                                                                                                                                                                                                                                                                                                                                                                                                                                                                                                                                                                                                                                                                                                                                                                                                                                                                                                                                                                                                                                                                                                                                                                                                                                                                                                                                                                                                                                                                                                                                                                                                                                                                                                                                                                                                                                                                                                                                                                                                                                                                                                                                                                                                                                                                                                                                                                                                                                                                                                                                                                                                                                                                                                                                                                                                                                              |
|--|--|--|--|------------------------------------------------------------------------------------------------------------------------------------------------------------------------------------------------------------------------------------------------------------------------------------------------------------------------------------------------------------------------------------------------------------------------------------------------------------------------------------------------------------------------------------------------------------------------------------------------------------------------------------------------------------------------------------------------------------------------------------------------------------------------------------------------------------------------------------------------------------------------------------------------------------------------------------------------------------------------------------------------------------------------------------------------------------------------------------------------------------------------------------------------------------------------------------------------------------------------------------------------------------------------------------------------------------------------------------------------------------------------------------------------------------------------------------------------------------------------------------------------------------------------------------------------------------------------------------------------------------------------------------------------------------------------------------------------------------------------------------------------------------------------------------------------------------------------------------------------------------------------------------------------------------------------------------------------------------------------------------------------------------------------------------------------------------------------------------------------------------------------------------------------------------------------------------------------------------------------------------------------------------------------------------------------------------------------------------------------------------------------------------------------------------------------------------------------------------------------------------------------------------------------------------------------------------------------------------------------------------------------------------------------------------------------------------------------------------------------------------------------------------------------------------------------------------------------------------------------------------------------------------------------------------------------------------------------------------------------------------------------------------------------------------------------------------------------------------------------------------------------------------------------------------------------------------------------------------------------------------------------------------------------------------------------------------------------------------------------------------------------------------------------------------------------------------------------------------------------------------------------------------------------------|
|  |  |  |  | <p>No cerebellar lesion, n=135, 42%<br/>Any cerebellar lesion n=15, 25% p&lt;0.0001<br/>Significant cerebellar lesion, n=15, 36%</p> <p><b>Cognitive impairment (FSIQ mean (SD))</b><br/>No cerebellar lesion, 87 (16.5)<br/>Any cerebellar lesion 78.4 (20) p=0.001<br/>Significant cerebellar lesion 76.8 (20.4)</p> <p><b>Cognitive impairment FSIQ &lt;70</b><br/>No cerebellar lesion, n=32, 10%<br/>Any cerebellar lesion, n=15, 26% p=0.001<br/>Significant cerebellar lesion, n=10, 26%</p> <p>Significant cerebellar lesions<br/>aOR 1.96 95% CI (0.72, 5.36)</p> <p><b>Cognitive impairment FSIQ &lt;85</b><br/>No cerebellar lesion, n=136, 43%<br/>Any cerebellar lesion, n=33, 58% p=0.038<br/>Significant cerebellar lesion, n=22, 56%</p> <p><b>No cognitive impairment FSIQ ≥85</b><br/>No cerebellar lesion, n=180, 57%<br/>Any cerebellar lesion, n=24, 42% P=0.038<br/>Significant cerebellar lesion, n=17, 44%</p> <p><b>Any cerebral palsy</b><br/>No cerebellar lesion, n=13, 4%<br/>Any cerebellar lesion, n=9, 15% p=0.001<br/>Significant cerebellar lesion, n=9, 21%</p> <p><b>Cerebral palsy with GMFCS ≥2</b><br/>No cerebellar lesion, n=3, 1%<br/>Any cerebellar lesion, n=3, 5% p=0.19<br/>Significant cerebellar lesion, n=3, 7%</p> <p><b>Early cranial ultrasound abnormalities</b></p> <p><b>Moderate to severe disability</b><br/>No IVH 3-4 or cPVL, n=43, 12%<br/>IVH 3-4 or cPVL, n=14, 42% p&lt;0.0001<br/>Normal scan, n=35, 12%<br/>aOR 0.61 95% CI (0.14, 2.59)</p> <p><b>Minimal or no disability</b><br/>No IVH 3-4 or cPVL, n=143, 41%<br/>IVH 3-4 or cPVL, n=7, 21% p&lt;0.0001<br/>Normal scan, n=120, 43%</p> <p><b>Cognitive impairment, FSIQ mean (SD)</b><br/>No IVH 3-4 or cPVL, 86.4 (17)<br/>IVH 3-4 or cPVL, 77.9 (19.1) p=0.008<br/>Normal scan, 86 (16.7)</p> <p><b>Cognitive impairment FSIQ &lt;70</b><br/>No IVH 3-4 or cPVL, n=38, 11%<br/>IVH 3-4 or cPVL, n=9, 28% p=0.006<br/>Normal scan, n=31, 11%<br/>aOR 0.42 95% CI (0.07, 2.33)</p> <p><b>Cognitive impairment FSIQ &lt;85</b><br/>No IVH 3-4 or cPVL, n=149, 44%<br/>IVH 3-4 or cPVL, n=20, 63% p=0.041<br/>Normal scan, n=123, 44%</p> <p><b>No cognitive impairment FSIQ ≥85</b><br/>No IVH 3-4 or cPVL, n=192, 56%<br/>IVH 3-4 or cPVL, n=12, 38% p=0.041<br/>Normal scan, n=154, 56%</p> <p><b>Any cerebral palsy</b><br/>No IVH 3-4 or cPVL, n=149, 44%<br/>IVH 3-4 or cPVL, n=20, 63% p=0.041<br/>Normal scan, n=123, 44%</p> <p><b>Cerebral palsy with GMFCS ≥2</b><br/>No IVH 3-4 or cPVL, n=3, 1%<br/>IVH 3-4 or cPVL, n=3, 9% p&lt;0.0001<br/>Normal scan, n=2, 1%</p> <p><b>Late cranial ultrasound abnormalities</b></p> <p><b>Moderate to severe disability</b><br/>No porencephalic cyst, cPVL, moderate to severe ventricular enlargement or shunt, n=40, 11%<br/>Porencephalic cyst, cPVL, moderate to severe ventricular enlargement or shunt, n=17, 77% p&lt;0.0001<br/>Normal scan, n=27, 10%<br/>aOR 27.85 95% CI (6.03, 128.68)</p> <p><b>Minimal or no disability</b><br/>No porencephalic cyst, cPVL, moderate to severe ventricular enlargement or shunt, n=149, 42%<br/>Porencephalic cyst, cPVL, moderate to severe ventricular enlargement or shunt, n=1, 5% P&lt;0.0001<br/>Normal scan, n=117, 43%</p> <p><b>Cognitive impairment (FSIQ mean (SD))</b><br/>No porencephalic cyst, cPVL, moderate to severe ventricular enlargement or shunt, 86.7 (16.7)<br/>Porencephalic cyst, cPVL, moderate to severe ventricular enlargement or shunt, 65.9 (18.7) P&lt;0.0001</p> |
|--|--|--|--|------------------------------------------------------------------------------------------------------------------------------------------------------------------------------------------------------------------------------------------------------------------------------------------------------------------------------------------------------------------------------------------------------------------------------------------------------------------------------------------------------------------------------------------------------------------------------------------------------------------------------------------------------------------------------------------------------------------------------------------------------------------------------------------------------------------------------------------------------------------------------------------------------------------------------------------------------------------------------------------------------------------------------------------------------------------------------------------------------------------------------------------------------------------------------------------------------------------------------------------------------------------------------------------------------------------------------------------------------------------------------------------------------------------------------------------------------------------------------------------------------------------------------------------------------------------------------------------------------------------------------------------------------------------------------------------------------------------------------------------------------------------------------------------------------------------------------------------------------------------------------------------------------------------------------------------------------------------------------------------------------------------------------------------------------------------------------------------------------------------------------------------------------------------------------------------------------------------------------------------------------------------------------------------------------------------------------------------------------------------------------------------------------------------------------------------------------------------------------------------------------------------------------------------------------------------------------------------------------------------------------------------------------------------------------------------------------------------------------------------------------------------------------------------------------------------------------------------------------------------------------------------------------------------------------------------------------------------------------------------------------------------------------------------------------------------------------------------------------------------------------------------------------------------------------------------------------------------------------------------------------------------------------------------------------------------------------------------------------------------------------------------------------------------------------------------------------------------------------------------------------------------------------|

|    |                                                                      |                                                                                                                                                                                                                                                                                                                                                                                                                                                                                                                                                                                                                         |                                                                                                                                                                                                                                                                                                                                                                                                                                                                                                                                                                                                                                                                                                                                                                                                                                       |                                                                                                                                                                                                                                                                                                                                                                                                                                                                                                                                                                                                                                                                                                                                                                                                                                                                                                                                                                                                                                                                                                                                                                                                                                                                                                                                                                                                                                                                          |
|----|----------------------------------------------------------------------|-------------------------------------------------------------------------------------------------------------------------------------------------------------------------------------------------------------------------------------------------------------------------------------------------------------------------------------------------------------------------------------------------------------------------------------------------------------------------------------------------------------------------------------------------------------------------------------------------------------------------|---------------------------------------------------------------------------------------------------------------------------------------------------------------------------------------------------------------------------------------------------------------------------------------------------------------------------------------------------------------------------------------------------------------------------------------------------------------------------------------------------------------------------------------------------------------------------------------------------------------------------------------------------------------------------------------------------------------------------------------------------------------------------------------------------------------------------------------|--------------------------------------------------------------------------------------------------------------------------------------------------------------------------------------------------------------------------------------------------------------------------------------------------------------------------------------------------------------------------------------------------------------------------------------------------------------------------------------------------------------------------------------------------------------------------------------------------------------------------------------------------------------------------------------------------------------------------------------------------------------------------------------------------------------------------------------------------------------------------------------------------------------------------------------------------------------------------------------------------------------------------------------------------------------------------------------------------------------------------------------------------------------------------------------------------------------------------------------------------------------------------------------------------------------------------------------------------------------------------------------------------------------------------------------------------------------------------|
|    |                                                                      |                                                                                                                                                                                                                                                                                                                                                                                                                                                                                                                                                                                                                         |                                                                                                                                                                                                                                                                                                                                                                                                                                                                                                                                                                                                                                                                                                                                                                                                                                       | <p>Normal scan, 87 (16.1)</p> <p><b>Cognitive impairment FSIQ &lt;70</b><br/>No porencephalic cyst, cPVL, moderate to severe ventricular enlargement or shunt, n=36, 10%<br/>Porencephalic cyst, cPVL, moderate to severe ventricular enlargement or shunt, n=11, 58% p&lt;0.0001<br/>Normal scan, n=24, 9%<br/>aOR 20.05 95% CI (3.63, 110.84)</p> <p><b>Cognitive impairment FSIQ &lt;85</b><br/>No porencephalic cyst, cPVL, moderate to severe ventricular enlargement or shunt, n=153, 43%<br/>Porencephalic cyst, cPVL, moderate to severe ventricular enlargement or shunt, n=16, 84% p&lt;0.0001<br/>Normal scan, n=118, 43%</p> <p><b>No cognitive impairment FSIQ ≥85</b><br/>No porencephalic cyst, cPVL, moderate to severe ventricular enlargement or shunt, n=201, 57%<br/>Porencephalic cyst, cPVL, moderate to severe ventricular enlargement or shunt, n=3, 16% p&lt;0.0001<br/>Normal scan, n=156, 57%</p> <p><b>Any cerebral palsy</b><br/>No porencephalic cyst, cPVL, moderate to severe ventricular enlargement or shunt, n=10, 3%<br/>Porencephalic cyst, cPVL, moderate to severe ventricular enlargement or shunt, n=12, 50% p&lt;0.0001<br/>Normal scan, n=6, 2%</p> <p><b>Cerebral palsy with GMFCS ≥2</b><br/>No porencephalic cyst, cPVL, moderate to severe ventricular enlargement or shunt, n=2, 1%<br/>Porencephalic cyst, cPVL, moderate to severe ventricular enlargement or shunt, n=4, 17% p&lt;0.0001<br/>Normal scan, n=1, 0%</p> |
| 10 | Hirovonen, 2017 <sup>22</sup><br>Finland<br>Retrospective cohort     | <p><b>Population</b></p> <ul style="list-style-type: none"> <li>Gestation &gt;22 weeks</li> <li>Birth weight &gt;500g</li> <li>Born 1991-2008</li> </ul> <p><b>Exposure (n=557)</b></p> <ul style="list-style-type: none"> <li>Intracranial haemorrhage</li> </ul> <p><b>Comparison (n=708,977)</b></p> <ul style="list-style-type: none"> <li>No intracranial haemorrhage</li> <li>ICD code</li> </ul> <p><b>Ascertainment/ definition</b></p> <ul style="list-style-type: none"> <li>Finnish national register</li> <li>ICD codes</li> </ul>                                                                          | <p><b>Outcomes</b></p> <ul style="list-style-type: none"> <li>Cognitive</li> </ul> <p><b>Measurement/ assessment</b></p> <ul style="list-style-type: none"> <li>ICD 9 and 10 codes</li> <li>BSID 1993</li> <li>Finnish WISC</li> </ul> <p><b>Follow-up</b></p> <ul style="list-style-type: none"> <li>7 years</li> <li>98% follow-up</li> </ul>                                                                                                                                                                                                                                                                                                                                                                                                                                                                                       | <p><b>Any intellectual disability after intracranial haemorrhage (HR (95%CI): p-value)</b></p> <p>Very preterm infants 2.92 (1.58–5.41); p= 0.001<br/>Moderately preterm 5.59 (1.57–19.9); p= 0.008<br/>Late preterm 4.58 (1.36–15.4); p= 0.014<br/>Term 2.94 (1.08-8); p=0.035</p>                                                                                                                                                                                                                                                                                                                                                                                                                                                                                                                                                                                                                                                                                                                                                                                                                                                                                                                                                                                                                                                                                                                                                                                      |
| 11 | Hollebrandse 2021 <sup>19</sup><br>Australia<br>Retrospective cohort | <p><b>Population</b></p> <ul style="list-style-type: none"> <li>Gestation &lt;28 weeks</li> <li>Born 1991-1992, 1997, 2005</li> </ul> <p><b>Exposure</b></p> <ul style="list-style-type: none"> <li>IVH grade 1 n=80</li> <li>IVH grade 2 n=53</li> <li>IVH grade 3 n=23</li> <li>IVH grade 4 n=12</li> </ul> <p><b>Comparator</b></p> <ul style="list-style-type: none"> <li>Unmatched</li> <li>Preterm infants without IVH n=331</li> </ul> <p><b>Ascertainment/ definition</b></p> <ul style="list-style-type: none"> <li>Ultrasound diagnosis</li> <li>Worst grade of IVH</li> <li>Papile classification</li> </ul> | <p><b>Outcomes</b></p> <ul style="list-style-type: none"> <li>Cognitive</li> <li>Motor</li> <li>Cerebral palsy</li> </ul> <p><b>Assessment/ measurement</b></p> <ul style="list-style-type: none"> <li>WISC III (1991-1992 cohort)</li> <li>WISC IV (1997 cohort)</li> <li>Differential Abilities Scale 2<sup>nd</sup> edition (2005 cohort)</li> <li>WRAT III (1991-92; 1997 cohorts)</li> <li>WRAT IV (2005 cohort)</li> <li>Behaviour rating inventory of executive functioning (parent-completed)</li> <li>Movement ABC 1<sup>st</sup> edition (1991-1992 and 1997 cohorts)</li> <li>Movement ABC 2<sup>nd</sup> edition (2005 cohort)</li> <li>GMFCS (1997 and 2005 cohort)</li> <li>Blinded assessment</li> </ul> <p><b>Follow-up</b></p> <ul style="list-style-type: none"> <li>8 years</li> <li>Follow-up 85-91.4%</li> </ul> | <p><b>Cognitive</b></p> <p><b>IQ score &lt;-2 SD</b><br/>IVH grade 4 n=5, 42% p=0.08 (X<sup>2</sup> trend)<br/>IVH grade 3 n=5, 22%<br/>No IVH n=41, 12%</p> <p>IVH 3-4: OR 2.68 95% CI (1.21, 5.94) p=0.01</p> <p><b>Impaired executive function</b><br/><b>Global executive composite ≥65</b><br/>IVH grade 4 n=2, 18% p=0.78 (X<sup>2</sup> trend)<br/>IVH grade 3 n=4, 18%<br/>No IVH n=49, 16%</p> <p>IVH 3-4: OR 1.17 95% CI (0.46, 2.97) p=0.75</p> <p><b>Behavioural regulation index ≥65</b><br/>IVH grade 4 n=2, 18% p=0.21 (X<sup>2</sup> trend)<br/>IVH grade 3 n=6, 27%<br/>No IVH n=46, 15%</p> <p>IVH 3-4: OR 1.76 95% CI (0.75, 4.11) p=0.2</p> <p><b>Metacognition index ≥65</b><br/>IVH grade 4 n=3, 27% p=0.1 (X<sup>2</sup> trend)<br/>IVH grade 3 n=5, 23%<br/>No IVH n=48, 16%</p> <p>IVH 3-4: OR 1.73 95% CI (0.74, 4.06) p=0.21</p> <p><b>Impaired academic skills (any academic skill &lt;-2SD)</b><br/>IVH grade 4 n=7, 64% p&lt;0.001 (X<sup>2</sup> trend)<br/>IVH grade 3 n=5, 24%<br/>No IVH n=50, 16%</p> <p>IVH 3-4: OR 2.91 95% CI (1.35, 6.27) p=0.006</p> <p><b>Impaired reading &lt;-2SD</b><br/>IVH grade 4 n=6, 55% p=0.002 (X<sup>2</sup> trend)<br/>IVH grade 3 n=4, 19%<br/>No IVH n=21, 10%</p> <p>IVH 3-4: OR 3.62 95% CI (1.59, 8.24) p=0.002</p> <p><b>Impaired spelling &lt;- 2 SD</b><br/>IVH grade 4 n=5, 45% p=0.011 (X<sup>2</sup> trend)<br/>IVH grade 3 n=3, 14%</p>                                                 |

|    |                                                                                     |                                                                                                                                                                                                                                                                                                                                                                                                                                                                                                                                                                                                                                                                                                                                                                                       |                                                                                                                                                                                                                                                                                                                                                                                  |                                                                                                                                                                                                                                                                                                                                                                                                                                                                                                                                                                                                                                                                                                                                                                                                                                                                                                                                                                                                                                                                                                                                                                                                                                                                                                                                                                                                                                                                                                                                                                                                        |
|----|-------------------------------------------------------------------------------------|---------------------------------------------------------------------------------------------------------------------------------------------------------------------------------------------------------------------------------------------------------------------------------------------------------------------------------------------------------------------------------------------------------------------------------------------------------------------------------------------------------------------------------------------------------------------------------------------------------------------------------------------------------------------------------------------------------------------------------------------------------------------------------------|----------------------------------------------------------------------------------------------------------------------------------------------------------------------------------------------------------------------------------------------------------------------------------------------------------------------------------------------------------------------------------|--------------------------------------------------------------------------------------------------------------------------------------------------------------------------------------------------------------------------------------------------------------------------------------------------------------------------------------------------------------------------------------------------------------------------------------------------------------------------------------------------------------------------------------------------------------------------------------------------------------------------------------------------------------------------------------------------------------------------------------------------------------------------------------------------------------------------------------------------------------------------------------------------------------------------------------------------------------------------------------------------------------------------------------------------------------------------------------------------------------------------------------------------------------------------------------------------------------------------------------------------------------------------------------------------------------------------------------------------------------------------------------------------------------------------------------------------------------------------------------------------------------------------------------------------------------------------------------------------------|
|    |                                                                                     |                                                                                                                                                                                                                                                                                                                                                                                                                                                                                                                                                                                                                                                                                                                                                                                       |                                                                                                                                                                                                                                                                                                                                                                                  | <p>No IVH n=21, 7%</p> <p>IVH 3-4: OR 4.48 95% CI (1.8, 11.2) p=0.001</p> <p><b>Impaired arithmetic &lt; -2 SD</b><br/> IVH grade 4 n=5, 45% p=0.09 (X<sup>2</sup> trend)<br/> IVH grade 3 n=4, 19%<br/> No IVH n=38, 12%</p> <p>IVH 3-4: OR 2.79 95% CI (1.2, 6.48) p=0.017</p> <p><b>Motor and cerebral palsy</b><br/> <b>Any motor dysfunction (cerebral palsy or MABC &lt;5<sup>th</sup> centile)</b><br/> IVH grade 4 n=11, 92% p&lt;0.001 (X<sup>2</sup> trend)<br/> IVH grade 3 n=10, 43%<br/> No IVH n=81, 24%</p> <p>IVH 3-4: OR 4.45 95% CI (2.18, 9.08) p&lt;0.001</p> <p><b>Cerebral palsy</b><br/> IVH grade 4 n=9, 75% p&lt;0.001 (X<sup>2</sup> trend)<br/> IVH grade 3 n=6, 26%<br/> No IVH n=26, 8%</p> <p>IVH 3-4: OR 8.8 95% CI (4.03, 19.2) p&lt;0.001</p> <p><b>MABC &lt;5<sup>th</sup> percentile (for the 2005 cohort)</b><br/> IVH grade 4 n=11, 92% p&lt;0.001 (X<sup>2</sup> trend)<br/> IVH grade 3 n=9, 45%<br/> No IVH n=79, 26%</p> <p>IVH 3-4: OR 4.7 95% CI (2.21, 9.97) p&lt;0.001</p>                                                                                                                                                                                                                                                                                                                                                                                                                                                                                                                                                                                |
| 12 | <p>Hreinsdottir 2018<sup>48</sup></p> <p>Sweden</p> <p>Prospective cohort study</p> | <p><b>Population</b></p> <ul style="list-style-type: none"> <li>Born 2004-2007</li> <li>Gestation &lt;32 years</li> </ul> <p><b>Exposure (n=9)</b></p> <ul style="list-style-type: none"> <li>IVH grade 3-4 and/ or PVL</li> </ul> <p><b>Comparator (n=99)</b></p> <ul style="list-style-type: none"> <li>Unmatched</li> <li>No IVH grade 3-4 or PVL</li> </ul> <p><b>Ascertainment/ definition</b></p> <ul style="list-style-type: none"> <li>Ultrasound imaging performed by paediatric radiologist</li> <li>Papile classification for IVH</li> <li>PVL defined by size, laterality and as cystic or diffuse</li> </ul>                                                                                                                                                             | <p><b>Outcomes</b></p> <ul style="list-style-type: none"> <li>Visual impairment</li> </ul> <p><b>Assessment/ measurement</b></p> <ul style="list-style-type: none"> <li>Linear visual acuity (Lea Hyvarinen chart)</li> <li>Cover test</li> <li>Refraction</li> </ul> <p><b>Follow-up</b></p> <ul style="list-style-type: none"> <li>6.5 years</li> <li>78% follow-up</li> </ul> | <p><b>Vision</b></p> <p><b>Subnormal visual acuity</b><br/> IVH 3-4 and or PVL<br/> OR 1.11 95% CI (0.25, 4.83) p=0.891</p> <p><b>Contrast sensitivity</b><br/> IVH 3-4 and or PVL<br/> OR 1.87 95% CI (0.43, 8.17) p=0.403</p> <p><b>Refractive error</b><br/> IVH 3-4 and or PVL<br/> OR 2.5 95% CI (0.55, 11.41) p=0.237</p> <p><b>Manifest strabismus</b><br/> IVH 3-4 and or PVL<br/> OR 4 95% CI (0.65, 24.55) p=0.134</p> <p><b>Composite score 1: Visual acuity with both eyes of less than 0.3, significant refractive error in the better eye and manifest strabismus</b><br/> IVH 3-4 and or PVL<br/> OR 3.63 95% CI (0.86, 15.41) p=0.08<br/> aOR 4.95 95% CI (0.65, 37.48) p=0.121</p> <p><b>Composite score 2: Visual acuity in worse eye of less than 0.3, significant refractive error in worse eye according and manifest strabismus</b><br/> IVH 3-4 and or PVL<br/> OR 5.67 95% CI (1.34, 24.07) p=0.019<br/> aOR 10.4 95% CI (1.23, 88) p=0.032</p> <p><b>Composite score 3: Visual acuity with both eyes of less than 0.5, significant refractive error in the better eye, manifest strabismus, negative stereopsis and contrast sensitivity less than 0.4</b><br/> IVH 3-4 and or PVL<br/> OR 7.6 95% CI (1.7, 34) p=0.008<br/> aOR 18.19 95% CI (2.15, 154.05) p=0.008</p> <p><b>Composite score 4: Visual acuity with both eyes of 0.8 or less, significant refractive error in the better eye, manifest strabismus, negative stereopsis and CS less than 0.5</b><br/> IVH 3-4 and or PVL<br/> OR 4.63 95% CI (0.9, 23.85) p=0.067<br/> a6.23 95% CI (1.15, 33.83) p=0.034</p> |
| 13 | <p>Jansen 2020<sup>23</sup></p> <p>Netherlands</p> <p>Prospective cohort study</p>  | <p><b>Population</b></p> <ul style="list-style-type: none"> <li>Gestation &lt;32 weeks</li> <li>Admitted 2006-2007</li> </ul> <p><b>Exposure</b></p> <ul style="list-style-type: none"> <li>Mild WMI (n=18)</li> <li>Moderate WMI (n=14)</li> <li>Severe WMI (n=8)</li> <li>Mild cerebellar injury (n=11)</li> <li>Moderate cerebellar injury (n=4)</li> <li>Severe cerebellar injury (n=6)</li> </ul> <p><b>Comparator</b></p> <ul style="list-style-type: none"> <li>Unmatched</li> <li>No WMI (n=46)</li> <li>No cerebellar injury (n=65)</li> </ul> <p><b>Ascertainment/ definition</b></p> <ul style="list-style-type: none"> <li>Ultrasound imaging and term MRI</li> <li>Imaging reviewed by two blinded experienced investigators (neonatologists or radiologists)</li> </ul> | <p><b>Outcomes</b></p> <ul style="list-style-type: none"> <li>Cognitive</li> </ul> <p><b>Assessment/ measurement</b></p> <ul style="list-style-type: none"> <li>National standardised achievement tests</li> </ul> <p><b>Follow-up</b></p> <ul style="list-style-type: none"> <li>9-10 years</li> <li>77% follow-up</li> </ul>                                                   | <p><b>Cognitive</b></p> <p><b>Reading comprehension</b><br/> Moderate-severe WMI vs. no injury<br/> B 0.241 p=0.483</p> <p>Moderate-severe cerebellar injury vs. no injury<br/> B 0.799 p=0.325</p> <p><b>Spelling</b><br/> Moderate-severe WMI vs. no injury<br/> B 1.076 p=0.075</p> <p>Moderate-severe cerebellar injury vs. no injury<br/> B 1.293 p= 0.115</p> <p><b>Mathematics</b><br/> Moderate-severe WMI vs. no injury<br/> B 1.856 p=0.003</p> <p>Moderate-severe cerebellar injury vs. no injury<br/> B 1.504 p=0.088</p>                                                                                                                                                                                                                                                                                                                                                                                                                                                                                                                                                                                                                                                                                                                                                                                                                                                                                                                                                                                                                                                                  |



|    |                                                                         |                                                                                                                                                                                                                                                                                                                                                                                                                                                                                                                                                                                                                                                                                           |                                                                                                                                                                                                                                                                                                                                                                                                                                                                                                                                                                                                                               |                                                                                                                                                                                                                                                                                                                                                                                                                                                                                                                                                                                                                                                                                                                                                                                                                                      |
|----|-------------------------------------------------------------------------|-------------------------------------------------------------------------------------------------------------------------------------------------------------------------------------------------------------------------------------------------------------------------------------------------------------------------------------------------------------------------------------------------------------------------------------------------------------------------------------------------------------------------------------------------------------------------------------------------------------------------------------------------------------------------------------------|-------------------------------------------------------------------------------------------------------------------------------------------------------------------------------------------------------------------------------------------------------------------------------------------------------------------------------------------------------------------------------------------------------------------------------------------------------------------------------------------------------------------------------------------------------------------------------------------------------------------------------|--------------------------------------------------------------------------------------------------------------------------------------------------------------------------------------------------------------------------------------------------------------------------------------------------------------------------------------------------------------------------------------------------------------------------------------------------------------------------------------------------------------------------------------------------------------------------------------------------------------------------------------------------------------------------------------------------------------------------------------------------------------------------------------------------------------------------------------|
| 14 | Kaur 2020 <sup>32</sup><br>Canada<br>Retrospective cohort study         | <p><b>Population</b></p> <ul style="list-style-type: none"> <li>• Preterm and term infants</li> <li>• Born 2006-2016</li> </ul> <p><b>Exposure</b></p> <ul style="list-style-type: none"> <li>• IVH grade 1 (n=811)</li> <li>• IVH grade 2 (n=186)</li> <li>• IVH grade 3-4 (n=194)</li> <li>• Preterm haemorrhage (n=1139)</li> </ul> <p><b>Comparator</b></p> <ul style="list-style-type: none"> <li>• Unmatched</li> <li>• No IVH (n=793, 062)</li> <li>• Preterm no haemorrhage (n=50, 185)</li> </ul> <p><b>Ascertainment/ definition</b></p> <ul style="list-style-type: none"> <li>• ICD 10 codes (based on ultrasound or MRI imaging)</li> <li>• Papile classification</li> </ul> | <p><b>Outcome</b></p> <ul style="list-style-type: none"> <li>• Reason for hospitalisation</li> </ul> <p><b>Assessment/ measurement</b></p> <ul style="list-style-type: none"> <li>• ICD 10 codes</li> </ul> <p><b>Follow-up</b></p> <ul style="list-style-type: none"> <li>• 12 years</li> <li>• Completeness of follow-up not specified</li> </ul>                                                                                                                                                                                                                                                                           | <p><b>Incidence of hospitalisation for:</b></p> <p><b>Cerebral palsy, n, incident rate per 1,000 person years (95%CI)</b><br/>IVH n=57, 6.8 (5.3, 8.8)<br/>No haemorrhage n=432, 0.1 (0.1, 0.1)<br/>Hazard ratio: 4.78 95% CI (3.21, 7.13)</p> <p>IVH grade 3-4 n=24 HR 14.78 95% CI (8.72-25.06)</p> <p><b>Ophthalmologic, n, incident rate per 1,000 person years (95%CI)</b><br/>IVH n=91 11.1 (9, 13.6)<br/>No haemorrhage n=6773, 1.2 (1.2, 1.3)<br/>HR 3.01 95% CI (2.32, 3.89)</p> <p>IVH grade 3-4 n=32 HR 7.87 95% CI (5.31-11.67)</p> <p><b>Otologic n, incident rate per 1,000 person years (95%CI)</b><br/>IVH n=328, 46.7 (41.9, 52)<br/>No haemorrhage n=102,153 22.1 (22, 22.2)<br/>HR 1.19 95% CI (1.06, 1.34)</p> <p>IVH grade 3-4 n=202 HR 1.07 95% CI (0.79-1.46)</p>                                             |
| 15 | Kiechl-Kohlendorfer 2013 <sup>28</sup><br>Austria<br>Prospective cohort | <p><b>Population</b></p> <ul style="list-style-type: none"> <li>• Gestation &lt;32 weeks</li> <li>• Born 2003-2006</li> </ul> <p><b>Exposure</b></p> <ul style="list-style-type: none"> <li>• Intracranial haemorrhage (all grades) (n=24)</li> <li>• Intracranial haemorrhage grade 3-4 (n=4)</li> <li>• PVL (n=2)</li> <li>• Intraparenchymal echodense lesions (n=2)</li> </ul> <p><b>Comparator</b></p> <ul style="list-style-type: none"> <li>• Unmatched</li> </ul> <p><b>Ascertainment/ definition</b></p> <ul style="list-style-type: none"> <li>• Ultrasound imaging</li> <li>• Papile classification</li> </ul>                                                                 | <p><b>Outcomes</b></p> <ul style="list-style-type: none"> <li>• Cognitive</li> </ul> <p><b>Measurement/assessment</b></p> <ul style="list-style-type: none"> <li>• Physical examination</li> <li>• Hannover-Wechsler Intelligence Test for preschool children, third edition</li> <li>• WPPSI</li> <li>• Snijders-Oomen Nonverbal Intelligence Test</li> <li>• TEDI-MATH</li> </ul> <p><b>Follow-up</b></p> <ul style="list-style-type: none"> <li>• 5 years</li> <li>• 72.2% follow-up</li> </ul>                                                                                                                            | <p><b>Delayed numerical skills</b><br/>Intracranial haemorrhage (all grades) n=11, 40.7%<br/>aOR 4.66 95% CI (1.56, 13.93) p=0.007</p> <p>Intracranial haemorrhage grade 3-4 n=3, 11.1%<br/>PVL n=2, 7.4%<br/>Intraparenchymal echodense lesions n=0</p>                                                                                                                                                                                                                                                                                                                                                                                                                                                                                                                                                                             |
| 16 | Klebermass-Schrehof 2012 <sup>30</sup><br>Austria<br>Prospective cohort | <p><b>Population</b></p> <ul style="list-style-type: none"> <li>• Gestation &lt;32 weeks</li> <li>• Admitted to NICU 1994-2005</li> </ul> <p><b>Exposure</b></p> <ul style="list-style-type: none"> <li>• IVH grade 1 (n=37)</li> <li>• IVH grade 2 (n=84)</li> <li>• IVH grade 3 (n=18)</li> <li>• IVH grade 4 (n=12)</li> </ul> <p><b>Comparator (n=320)</b></p> <ul style="list-style-type: none"> <li>• Unmatched</li> <li>• No IVH</li> </ul> <p><b>Ascertainment/ definition</b></p> <ul style="list-style-type: none"> <li>• Ultrasound diagnosis</li> <li>• Most severe scan used</li> <li>• Papile classification</li> </ul>                                                     | <p><b>Outcomes</b></p> <ul style="list-style-type: none"> <li>• Neurosensory impairment (composite)</li> <li>• Motor</li> <li>• Cerebral palsy</li> <li>• Language</li> <li>• Visual</li> <li>• Hearing</li> </ul> <p><b>Measurement/assessment</b></p> <ul style="list-style-type: none"> <li>• BSID II (MDI, PDI)</li> <li>• K-ABC</li> <li>• Beery-Buktenica Developmental Test of VMI</li> <li>• Clinical assessment</li> </ul> <p><b>Follow-up</b></p> <ul style="list-style-type: none"> <li>• 5 years (1, 2, and 3.5 years)</li> <li>• Only those with follow-up included (loss to follow-up not specified)</li> </ul> | <p><b>Outcomes at 5.5 years</b></p> <p><b>Group 1: infants born &lt; 28 weeks' gestation</b></p> <p><b>KABC &lt;70</b><br/>No IVH, 7.6%<br/>IVH grade 3, 33.3%<br/>IVH grade 4, 50%</p> <p><b>KABC mean (SD)</b><br/>No IVH, 91.5 (15.1)<br/>IVH grade 3, 88.6 (11.1) p=not significant<br/>IVH grade 4, 88.5 (10.6) p= not significant</p> <p><b>VMI mean (SD)</b><br/>No IVH, 92.7 (20)<br/>IVH grade 3, 67.5 (14) p=0.04<br/>IVH grade 4, 76 (26.8) p=0.04</p> <p><b>Cerebral palsy</b><br/>No IVH, 14.3%<br/>IVH grade 3, 63.6% p&lt;0.01<br/>IVH grade 4, 90.9% p&lt;0.01</p> <p><b>Visual impairment</b><br/>No IVH, 7.5%<br/>IVH grade 3, 45.5%, p=0.03<br/>IVH grade 4, 90.9% p&lt;0.01</p> <p><b>Acoustic impairment</b><br/>No IVH, 2.2%<br/>IVH grade 3, 0% p= not significant<br/>IVH grade 4, 0% p= not significant</p> |
| 17 | Koc 2016 <sup>24</sup><br>Turkey<br>Retrospective cohort                | <p><b>Population (n=90)</b></p> <ul style="list-style-type: none"> <li>• Gestation &lt;32 weeks</li> <li>• Birthweight &lt;1500g</li> <li>• Born 2001</li> </ul> <p><b>Exposure</b></p> <ul style="list-style-type: none"> <li>• IVH grade 1-2 (n= 7)</li> <li>• IVH grade 3-4 (n= 8)</li> </ul> <p><b>Comparator</b></p> <ul style="list-style-type: none"> <li>• No IVH (n=75)</li> </ul> <p><b>Ascertainment/ definition</b></p> <ul style="list-style-type: none"> <li>• Neonatal unit database and medical records</li> </ul>                                                                                                                                                        | <p><b>Outcomes</b></p> <ul style="list-style-type: none"> <li>• Cognitive</li> </ul> <p><b>Measurement/ assessment</b></p> <ul style="list-style-type: none"> <li>• WISC-R</li> </ul> <p><b>Follow-up</b></p> <ul style="list-style-type: none"> <li>• 5.9-7.9 years</li> <li>• 100% follow-up</li> </ul>                                                                                                                                                                                                                                                                                                                     | <p><b>WISC-R score &lt;85</b><br/>IVH (n=7; 46.7%)<br/>No IVH (n= 25; 33.3%)</p> <p><b>WISC-R score &gt;85</b><br/>IVH grade (n=8; 13.8%)<br/>No IVH (n= 50; 84.2%)</p> <p>p=0.381</p>                                                                                                                                                                                                                                                                                                                                                                                                                                                                                                                                                                                                                                               |
| 18 | Martinez-Cruz 2008 <sup>45</sup><br>Mexico<br>Case control              | <p><b>Population</b></p> <ul style="list-style-type: none"> <li>• Gestation &lt;34 weeks</li> <li>• Birthweight &lt;1500g</li> <li>• Born 1990-2005</li> </ul> <p><b>Exposure (n=103)</b></p> <ul style="list-style-type: none"> <li>• IVH</li> </ul>                                                                                                                                                                                                                                                                                                                                                                                                                                     | <p><b>Outcomes</b></p> <ul style="list-style-type: none"> <li>• Sensorineural hearing loss</li> </ul> <p><b>Measurement/ assessment</b></p> <ul style="list-style-type: none"> <li>• Brainstem auditory evoked potentials</li> <li>• Transient auditory evoked otoacoustic emissions</li> <li>• Behavioural hearing evaluation</li> </ul>                                                                                                                                                                                                                                                                                     | <p><b>IVH</b><br/>Sensorineural hearing loss (n=71; 48.6%)<br/>No sensorineural hearing loss (n=32; 11.8%)</p> <p><b>Multivariate logistic regression of risk factors for sensorineural hearing loss</b><br/>IVH: aOR 7.1 95% CI (4.34, 11.6) p&lt;0.000</p>                                                                                                                                                                                                                                                                                                                                                                                                                                                                                                                                                                         |

|    |                                                                          |                                                                                                                                                                                                                                                                                                                                                                                                                                                                                                                                                                                                                                                                                                                                                                                                                                                                                        |                                                                                                                                                                                                                                                                                                                                                                                                                                                                                                                                                                                                                                   |                                                                                                                                                                                                                                                                                                                                                                                                                                                                                                                                                                                                                                                                                                                                                                                                                                                                                                                                                                                                                                                                                                                                                                                                                                                                                                                                    |
|----|--------------------------------------------------------------------------|----------------------------------------------------------------------------------------------------------------------------------------------------------------------------------------------------------------------------------------------------------------------------------------------------------------------------------------------------------------------------------------------------------------------------------------------------------------------------------------------------------------------------------------------------------------------------------------------------------------------------------------------------------------------------------------------------------------------------------------------------------------------------------------------------------------------------------------------------------------------------------------|-----------------------------------------------------------------------------------------------------------------------------------------------------------------------------------------------------------------------------------------------------------------------------------------------------------------------------------------------------------------------------------------------------------------------------------------------------------------------------------------------------------------------------------------------------------------------------------------------------------------------------------|------------------------------------------------------------------------------------------------------------------------------------------------------------------------------------------------------------------------------------------------------------------------------------------------------------------------------------------------------------------------------------------------------------------------------------------------------------------------------------------------------------------------------------------------------------------------------------------------------------------------------------------------------------------------------------------------------------------------------------------------------------------------------------------------------------------------------------------------------------------------------------------------------------------------------------------------------------------------------------------------------------------------------------------------------------------------------------------------------------------------------------------------------------------------------------------------------------------------------------------------------------------------------------------------------------------------------------|
|    |                                                                          | <p><b>Comparator (n=315)</b></p> <ul style="list-style-type: none"> <li>No IVH</li> </ul> <p><b>Ascertainment/ definition</b></p> <ul style="list-style-type: none"> <li>Medical records</li> <li>Ultrasound diagnosis.</li> <li>Papile classification.</li> </ul>                                                                                                                                                                                                                                                                                                                                                                                                                                                                                                                                                                                                                     | <ul style="list-style-type: none"> <li>Free field audiometry</li> <li>Tympanometry</li> <li>Pure Tone Audiometry</li> </ul> <p><b>Follow-up</b></p> <ul style="list-style-type: none"> <li>Mean age 7.8±3.7 years</li> <li>100% follow-up (case control)</li> </ul>                                                                                                                                                                                                                                                                                                                                                               |                                                                                                                                                                                                                                                                                                                                                                                                                                                                                                                                                                                                                                                                                                                                                                                                                                                                                                                                                                                                                                                                                                                                                                                                                                                                                                                                    |
| 19 | Neubauer 2008 <sup>12</sup><br>Germany<br>Prospective cohort             | <p><b>Population</b></p> <ul style="list-style-type: none"> <li>Birthweight &lt;1000g</li> <li>Born 1993-1998</li> </ul> <p><b>Exposure</b></p> <ul style="list-style-type: none"> <li>IVH grade 1-2 (n=26)</li> <li>IVH grade 3-4, PVL (n=18)</li> </ul> <p><b>Comparator</b></p> <ul style="list-style-type: none"> <li>Unmatched</li> <li>No IVH or PVL (n=91)</li> </ul> <p><b>Ascertainment/ definition</b></p> <ul style="list-style-type: none"> <li>Ultrasound diagnosis</li> <li>Papile classification</li> </ul>                                                                                                                                                                                                                                                                                                                                                             | <p><b>Outcomes</b></p> <ul style="list-style-type: none"> <li>Neurodevelopmental impairment (composite)</li> </ul> <p><b>Measurement/assessment</b></p> <ul style="list-style-type: none"> <li>Modified Touwen test</li> <li>K-ABC</li> <li>Snijders-Oomen Non-Verbal Intelligence Test</li> <li>Hamburg-Wechsler Intelligence Test for Children</li> </ul> <p><b>Follow-up</b></p> <ul style="list-style-type: none"> <li>10 years</li> <li>79% follow-up</li> </ul>                                                                                                                                                             | <p><b>Logistic regression for major impairment vs. normal development or minor impairment at school age</b></p> <p><b>Grade 3-4 IVH or PVL</b><br/>Normal (n=4, 22%)<br/>Minor (n=2, 11%)<br/>Major (n=12, 67%)<br/>Risk of impairment: OR 2.46 95% CI (0.52-11.7)</p>                                                                                                                                                                                                                                                                                                                                                                                                                                                                                                                                                                                                                                                                                                                                                                                                                                                                                                                                                                                                                                                             |
| 20 | Piris Borregas 2019 <sup>13</sup><br>Spain<br>Retrospective cohort study | <p><b>Population (n=1001)</b></p> <ul style="list-style-type: none"> <li>Birthweight 500-1250g</li> <li>Born 1991-2008</li> </ul> <p><b>Exposure</b></p> <ul style="list-style-type: none"> <li>Severe brain injury (IVH grade 3-4, ventriculomegaly III, PVL or intraparenchymal echodense lesion grade 3 or greater)</li> </ul> <p><b>Comparator</b></p> <ul style="list-style-type: none"> <li>Unmatched</li> </ul> <p><b>Ascertainment/ definition</b></p> <ul style="list-style-type: none"> <li>Neonatal database</li> <li>Ultrasound diagnosis</li> <li>Papile classification</li> </ul>                                                                                                                                                                                                                                                                                        | <p><b>Outcomes</b></p> <ul style="list-style-type: none"> <li>Neurodevelopment (composite)</li> <li>Cognitive</li> <li>Motor</li> <li>Hearing impairment</li> <li>Visual impairment</li> </ul> <p><b>Assessment/ measurement</b></p> <ul style="list-style-type: none"> <li>GMFCS</li> </ul> <p><b>Follow-up</b></p> <ul style="list-style-type: none"> <li>7 years</li> </ul>                                                                                                                                                                                                                                                    | <p><b>Poor neurodevelopmental outcome</b><br/>Severe brain injury, n=46, 32%<br/>No severe brain injury, n=208, 24%<br/>OR 1.41 95% CI (0.94, 2.10) p=0.09<br/>Independent OR 2.02 95% CI (1.22, 3.31) p=0.18</p> <p><b>Severe brain injury (birthweight 500-1000g)</b><br/>Independent OR 2.02 95% CI (1.22, 3.31)</p>                                                                                                                                                                                                                                                                                                                                                                                                                                                                                                                                                                                                                                                                                                                                                                                                                                                                                                                                                                                                            |
| 21 | Pittet 2019 <sup>25</sup><br>Switzerland<br>Prospective cohort study     | <p><b>Population</b></p> <ul style="list-style-type: none"> <li>Gestation &lt;30 weeks</li> <li>Born 2006</li> </ul> <p><b>Exposure</b></p> <ul style="list-style-type: none"> <li>IVH grade 3-4 or cPVL (n=22)</li> </ul> <p><b>Comparator</b></p> <ul style="list-style-type: none"> <li>Unmatched</li> <li>No IVH grade 3-4 or cPVL (n=213)</li> </ul> <p><b>Ascertainment/ definition</b></p> <ul style="list-style-type: none"> <li>Swiss neonatal network follow-up group</li> </ul>                                                                                                                                                                                                                                                                                                                                                                                             | <p><b>Outcomes</b></p> <ul style="list-style-type: none"> <li>Cognitive</li> <li>Cerebral palsy</li> <li>Visual impairment</li> <li>Hearing impairment</li> </ul> <p><b>Assessment/ measurement</b></p> <ul style="list-style-type: none"> <li>Kaufman ABC</li> <li>Neurological exam</li> <li>GMFCS</li> </ul> <p><b>Follow-up</b></p> <ul style="list-style-type: none"> <li>5.5 – 6 years</li> <li>81% follow-up</li> </ul>                                                                                                                                                                                                    | <p><b>Cognitive (K-ABC – MPC score &lt; 1SD)</b><br/>IVH 3-4 or PVL<br/>OR 2.9 95% CI (1, 8.2) p=0.04<br/>aOR 2.3 95% CI (0.7, 7.7) p=0.15</p> <p><b>Use of early intervention/ therapy service</b><br/>IVH 3-4 or cPVL aOR 2.7 95% CI (1.3, 5.7)</p>                                                                                                                                                                                                                                                                                                                                                                                                                                                                                                                                                                                                                                                                                                                                                                                                                                                                                                                                                                                                                                                                              |
| 22 | Sherlock 2005 <sup>14</sup><br>Australia<br>Prospective cohort           | <p><b>Population</b></p> <ul style="list-style-type: none"> <li>Gestation &lt;28 weeks</li> <li>Birthweight &lt;1000g</li> <li>Survivors born 1991-1992</li> </ul> <p><b>Exposure</b></p> <ul style="list-style-type: none"> <li>IVH Grade 1 (n=47)</li> <li>IVH Grade 2 (n= 25)</li> <li>IVH Grade 3 (n= 12)</li> <li>IVH Grade 4 (n= 6)</li> </ul> <p><b>Comparator</b></p> <ul style="list-style-type: none"> <li>Matched on sex, mother's country of birth, and health insurance status</li> <li>Extremely low birth weight or very preterm infants without IVH (n=180)</li> </ul> <p><b>Ascertainment/ definition</b></p> <ul style="list-style-type: none"> <li>Enrolled in Victorian Collaborative Study</li> <li>Ultrasound diagnosis (at least one scan by a certified sonographer)</li> <li>Worst grade of IVH on either side used</li> <li>Papile classification</li> </ul> | <p><b>Outcomes</b></p> <ul style="list-style-type: none"> <li>Disability (composite)</li> <li>Neurosensory disability (composite)</li> <li>Cognitive</li> <li>Motor</li> <li>Cerebral palsy</li> <li>Speech and language</li> <li>Visual impairment</li> <li>Hearing impairment</li> </ul> <p><b>Measurement/assessment</b></p> <ul style="list-style-type: none"> <li>Medical assessment</li> <li>Movement ABC</li> <li>WISC-III</li> <li>Tower of London</li> <li>Rey Complex Figure</li> <li>WRAT</li> </ul> <p><b>Follow-up</b></p> <ul style="list-style-type: none"> <li>Mean 8.7 years</li> <li>92.3% follow-up</li> </ul> | <p><b>Abnormal movement</b><br/>No IVH (n=39, 22.5%)<br/>Grade 1 IVH (n=11, 25%)<br/>Grade 2 IVH (n=6, 30%)<br/>Grade 3 IVH (n=3, 27.3%)<br/>Grade 4 IVH (n=4, 100%)<br/><math>\chi^2</math> linear trend = 5.3; P = 0.021</p> <p><b>Cerebral palsy</b><br/>No IVH (n=12, 6.7%)<br/>Grade 1 IVH (n=3, 6.4%)<br/>Grade 2 IVH (n=6, 24%)<br/>Grade 3 IVH (n=2, 16.7%)<br/>Grade 4 IVH (n=6, 100%)<br/><math>\chi^2</math> linear trend = 31.7; p &lt;0.0001</p> <p><b>Moderate to severe cerebral palsy</b><br/>No IVH (n=4, 2.2%)<br/>Grade 1 IVH (n=0, 0%)<br/>Grade 2 IVH (n=4, 15%)<br/>Grade 3 IVH (n=1, 8.3%)<br/>Grade 4 IVH (n=5, 83.3%)<br/><math>\chi^2</math> linear trend = 40.8; p &lt;0.0001</p> <p><b>Major neurosensory disability</b><br/>No IVH (n=28, 15.6%)<br/>Grade 1 IVH (n=5, 10.6%)<br/>Grade 2 IVH (n=5, 20%)<br/>Grade 3 IVH (n=1, 8.3%)<br/>Grade 4 IVH (n=6, 100%)<br/><math>\chi^2</math> linear trend = 6.9; p = 0.009</p> <p><b>IQ score mean (SD)</b><br/>No IVH 0.71 (1.25)<br/>Grade 1 IVH 0.76 (1.32)<br/>Grade 2 IVH 0.71 (1.12)<br/>Grade 3 IVH 1.21 (1.13)<br/>Grade 4 IVH 3.28 (0.88)<br/>ANOVA F4,265 = 6.7; p &lt;0.0001</p> <p><b>Verbal comprehension index mean (SD)</b><br/>No IVH 96.6 (16.2)<br/>Grade 1 IVH 96.3 (15.7)<br/>Grade 2 IVH 99.6 (12.8)<br/>Grade 3 IVH 93.1 (15.4)</p> |

|  |  |  |  |                                                                                                                                                                                                                                                                                                                                                                                                                                                                                                                                                                                                                                                                                                                                                                                                                                                                                                                                                                                                                                                                                                                                                                                                                                                                                                                                                                                                                                                                                                                                                                                                                                                                                                                                                                                                                                                                                                                                                                                                                                                                                                                                                                                                                                                                                                                                                                                                                                                                                                                                                                                                                                                                                                                                                                                                                                                                                                                                                                           |
|--|--|--|--|---------------------------------------------------------------------------------------------------------------------------------------------------------------------------------------------------------------------------------------------------------------------------------------------------------------------------------------------------------------------------------------------------------------------------------------------------------------------------------------------------------------------------------------------------------------------------------------------------------------------------------------------------------------------------------------------------------------------------------------------------------------------------------------------------------------------------------------------------------------------------------------------------------------------------------------------------------------------------------------------------------------------------------------------------------------------------------------------------------------------------------------------------------------------------------------------------------------------------------------------------------------------------------------------------------------------------------------------------------------------------------------------------------------------------------------------------------------------------------------------------------------------------------------------------------------------------------------------------------------------------------------------------------------------------------------------------------------------------------------------------------------------------------------------------------------------------------------------------------------------------------------------------------------------------------------------------------------------------------------------------------------------------------------------------------------------------------------------------------------------------------------------------------------------------------------------------------------------------------------------------------------------------------------------------------------------------------------------------------------------------------------------------------------------------------------------------------------------------------------------------------------------------------------------------------------------------------------------------------------------------------------------------------------------------------------------------------------------------------------------------------------------------------------------------------------------------------------------------------------------------------------------------------------------------------------------------------------------------|
|  |  |  |  | <p>Grade 4 IVH 74.3 (12.7)<br/>ANOVA F4,251 = 1.8; p = 0.12</p> <p><b>Perceptual organisation index mean (SD)</b><br/>No IVH 98.5 (16.3)<br/>Grade 1 IVH 98.2 (15.7)<br/>Grade 2 IVH 96.9 (14.8)<br/>Grade 3 IVH 91.6 (12.7)<br/>Grade 4 IVH 71.7 (11.1)<br/>ANOVA F4,249 = 2.5; p = 0.042</p> <p><b>Freedom from distractibility index mean (SD)</b><br/>No IVH 92.3 (114.9)<br/>Grade 1 IVH 95.5 (15.0)<br/>Grade 2 IVH 97.7 (12.8)<br/>Grade 3 IVH 94.9 (17.4)<br/>Grade 4 IVH 71.0 (3.5)<br/>ANOVA F4,250 = 2.8; p = 0.026</p> <p><b>Processing speed index mean (SD)</b><br/>No IVH 99.5 (15.8)<br/>Grade 1 IVH 99.1 (16.6)<br/>Grade 2 IVH 99.3 (13.0)<br/>Grade 3 IVH 94.9 (19.3)<br/>Grade 4 IVH 71.0 (9.5)<br/>ANOVA F4,245 = 2.7; p = 0.033</p> <p><b>Tower of London (executive function) raw score mean (SD)</b><br/>No IVH 73.3 (14.4)<br/>Grade 1 IVH 71.5 (12.4)<br/>Grade 2 IVH 71.1 (20.4)<br/>Grade 3 IVH 66.5 (8.3)<br/>Grade 4 IVH 54.3 (22.0)<br/>ANOVA F4,244 = 1.8; p = 0.13</p> <p><b>Key complex figure (executive function) raw score mean (SD)</b><br/>No IVH 22.5 (7.5)<br/>Grade 1 IVH 23.1 (7.4)<br/>Grade 2 IVH 24.2 (5.8)<br/>Grade 3 IVH 19.3 (8.3)<br/>Grade 4 IVH 11.2 (9.8)<br/>ANOVA F4,242 = 2.6; p = 0.037</p> <p><b>Wide range achievements test score mean (SD)</b><br/><b>Reading</b><br/>No IVH 95.2 (15.7)<br/>Grade 1 IVH 102.7 (15.4)<br/>Grade 2 IVH 99.0 (14.2)<br/>Grade 3 IVH 98.1 (11.9)<br/>Grade 4 IVH 70.5g (20.9)<br/>ANOVA F4,251 = 5.1; p = 0.001</p> <p><b>Spelling</b><br/>No IVH 93.6 (12.4)<br/>Grade 1 IVH 97.8 (12.3)<br/>Grade 2 IVH 95.9 (10.8)<br/>Grade 3 IVH 96.8 (11.9)<br/>Grade 4 IVH 73.5 (20.0)<br/>ANOVA F4,250 = 4.0; p = 0.003</p> <p><b>Arithmetic</b><br/>No IVH 88.3 (14.3)<br/>Grade 1 IVH 93.6 (14.9)<br/>Grade 2 IVH 92.6 (10.6)<br/>Grade 3 IVH 89.1 (10.1)<br/>Grade 4 IVH 65.5 (14.5)<br/>ANOVA F4,248 = 4.5; p = 0.002</p> <p><b>Cognitive test scores (compared to normal birthweight controls)</b><br/><b>IQ score &lt;1 SD from the mean (n, %)</b><br/>No IVH n=64 (35.6%)<br/>Grade 1 IVH n=18 (38.3%)<br/>Grade 2 IVH n=9 (36%)<br/>Grade 3 IVH n=7 (58.3%)<br/>Grade 4 IVH n=6(100%)<br/><math>\chi^2</math> linear trend=6.8; P=0.009</p> <p><b>Wide range achievements test score &lt;1 SD from the mean, n (%)</b><br/><b>Low reading</b><br/>No IVH n=42 (24.4%)<br/>Grade 1 IVH n=6 (13.3%)<br/>Grade 2 IVH n=5 (20.8%)<br/>Grade 3 IVH n=2 (18.2%)<br/>Grade 4 IVH n=3 (75%)<br/><math>\chi^2</math> linear trend=0.1; p=0.77</p> <p><b>Low spelling</b><br/>No IVH n=33 (19.2%)<br/>Grade 1 IVH n=6 (13.6%)<br/>Grade 2 IVH n=2 (8.3%)<br/>Grade 3 IVH n=3 (27.3%)<br/>Grade 4 IVH n=3 (75%)<br/><math>\chi^2</math> linear trend=0.7; p=0.39</p> <p><b>Low arithmetic</b><br/>No IVH n=47 (27.6%)<br/>Grade 1 IVH n=9 (20.5%)<br/>Grade 2 IVH n=2 (8.3%)<br/>Grade 3 IVH n=3 (27.3%)<br/>Grade 4 IVH n=4 (100%)<br/><math>\chi^2</math> linear trend=0.1; p=0.79</p> |
|--|--|--|--|---------------------------------------------------------------------------------------------------------------------------------------------------------------------------------------------------------------------------------------------------------------------------------------------------------------------------------------------------------------------------------------------------------------------------------------------------------------------------------------------------------------------------------------------------------------------------------------------------------------------------------------------------------------------------------------------------------------------------------------------------------------------------------------------------------------------------------------------------------------------------------------------------------------------------------------------------------------------------------------------------------------------------------------------------------------------------------------------------------------------------------------------------------------------------------------------------------------------------------------------------------------------------------------------------------------------------------------------------------------------------------------------------------------------------------------------------------------------------------------------------------------------------------------------------------------------------------------------------------------------------------------------------------------------------------------------------------------------------------------------------------------------------------------------------------------------------------------------------------------------------------------------------------------------------------------------------------------------------------------------------------------------------------------------------------------------------------------------------------------------------------------------------------------------------------------------------------------------------------------------------------------------------------------------------------------------------------------------------------------------------------------------------------------------------------------------------------------------------------------------------------------------------------------------------------------------------------------------------------------------------------------------------------------------------------------------------------------------------------------------------------------------------------------------------------------------------------------------------------------------------------------------------------------------------------------------------------------------------|

|    |                                                                      |                                                                                                                                                                                                                                                                                                                                                                                                                                                                                                                                                                                                                                                                                                                                                       |                                                                                                                                                                                                                                                                                                                                                                                                                                                                                                                                                                                                                                                                                                                               |                                                                                                                                                                                                                                                                                                                                                                                                                                                                                                                                                                                                                                                                                                                                                                                                                                                                                                                                                                                                                                                                                                                                                                                                                                                                                                                                                                                                                                     |
|----|----------------------------------------------------------------------|-------------------------------------------------------------------------------------------------------------------------------------------------------------------------------------------------------------------------------------------------------------------------------------------------------------------------------------------------------------------------------------------------------------------------------------------------------------------------------------------------------------------------------------------------------------------------------------------------------------------------------------------------------------------------------------------------------------------------------------------------------|-------------------------------------------------------------------------------------------------------------------------------------------------------------------------------------------------------------------------------------------------------------------------------------------------------------------------------------------------------------------------------------------------------------------------------------------------------------------------------------------------------------------------------------------------------------------------------------------------------------------------------------------------------------------------------------------------------------------------------|-------------------------------------------------------------------------------------------------------------------------------------------------------------------------------------------------------------------------------------------------------------------------------------------------------------------------------------------------------------------------------------------------------------------------------------------------------------------------------------------------------------------------------------------------------------------------------------------------------------------------------------------------------------------------------------------------------------------------------------------------------------------------------------------------------------------------------------------------------------------------------------------------------------------------------------------------------------------------------------------------------------------------------------------------------------------------------------------------------------------------------------------------------------------------------------------------------------------------------------------------------------------------------------------------------------------------------------------------------------------------------------------------------------------------------------|
| 23 | Tymofiyeva 2018 <sup>33</sup><br>USA<br>Prospective cohort           | <p><b>Population (n=24)</b></p> <ul style="list-style-type: none"> <li>Gestation &lt; 33 weeks</li> </ul> <p><b>Exposure</b></p> <ul style="list-style-type: none"> <li>Mild WMI (n=4)</li> <li>Moderate WMI (n=5)</li> <li>Severe WMI (n=1)</li> <li>IVH grade 1 (n=5)</li> <li>IVH grade 2 (n=0)</li> <li>IVH grade 3 (n=0)</li> <li>IVH grade 4 (n=0)</li> </ul> <p><b>Comparator</b></p> <ul style="list-style-type: none"> <li>Unmatched</li> <li>No WMI (n=14)</li> <li>No IVH (n=19)</li> </ul> <p><b>Ascertainment/ definition</b></p> <ul style="list-style-type: none"> <li>MRI imaging reviewed by a blinded paediatric neuroradiologist</li> <li>Used own classification of white matter injury</li> <li>Papile classification</li> </ul> | <p><b>Outcome</b></p> <ul style="list-style-type: none"> <li>Cognitive</li> <li>Behaviour</li> </ul> <p><b>Assessment/ measurement</b></p> <ul style="list-style-type: none"> <li>Test of variables of attention</li> <li>Conners comprehensive behaviour rating scales</li> <li>CBCL</li> <li>Assessment undertaken by a blinded psychologist</li> <li>Parental questionnaire</li> </ul> <p><b>Follow-up</b></p> <ul style="list-style-type: none"> <li>10-14 years</li> <li>Completeness not specified</li> </ul>                                                                                                                                                                                                           | <p><b>Attention (abnormal)</b></p> <p>Mild WMI n=3, 75%<br/>Moderate WMI n=0, 0%<br/>No WMI n=8, 57% p=0.05</p>                                                                                                                                                                                                                                                                                                                                                                                                                                                                                                                                                                                                                                                                                                                                                                                                                                                                                                                                                                                                                                                                                                                                                                                                                                                                                                                     |
| 24 | Van de Bor 2004 <sup>35</sup><br>Netherlands<br>Prospective cohort   | <p><b>Population</b></p> <ul style="list-style-type: none"> <li>Gestation &lt; 32 weeks</li> <li>Birthweight &lt; 1500 g</li> <li>Born 1983</li> </ul> <p><b>Exposure</b></p> <ul style="list-style-type: none"> <li>IVH grade 1-2 (n=45)</li> <li>IVH grade 3-4 (n=17)</li> </ul> <p><b>Comparator (n=216)</b></p> <ul style="list-style-type: none"> <li>Unmatched</li> <li>No IVH</li> </ul> <p><b>Ascertainment/ definition</b></p> <ul style="list-style-type: none"> <li>Ultrasound diagnosis</li> <li>Papile classification</li> </ul>                                                                                                                                                                                                         | <p><b>Outcomes</b></p> <ul style="list-style-type: none"> <li>Disability (composite)</li> <li>Cognitive</li> <li>Neurological status (motor)</li> <li>Speech and language</li> <li>Behaviour</li> <li>Hearing</li> <li>Vision</li> </ul> <p><b>Measurement/assessment</b></p> <ul style="list-style-type: none"> <li>Questionnaires (completed by parents at 9 years; adolescents at 14 years)</li> <li>Home visit and neurodevelopmental assessment by paediatrician unaware of medical history</li> <li>WHO classification of impairment, disability, and handicap</li> </ul> <p><b>Follow-up</b></p> <ul style="list-style-type: none"> <li>5, 9 and 14 years</li> <li>91.5% follow-up of survivors at 14 years</li> </ul> | <p><b>Disability at 5 years</b></p> <p>No IVH n=49 (23%)<br/>IVH grade 3-4 n=5 (31.3%)</p> <p><b>Cognitive disability</b></p> <p>No IVH n=18 (8.3%)<br/>IVH grade 3-4 n=1 (5.9%) p=not significant</p> <p><b>Motor disability</b></p> <p>No IVH n=8 (3.7%)<br/>IVH grade 3-4 n=3 (17.6%) p=0.00</p> <p><b>Speech/language disability</b></p> <p>No IVH n=34 (15.7%)<br/>IVH grade 3-4 n=1 (5.9%) p= not significant</p> <p><b>Visual disability</b></p> <p>No IVH n=1 (0.5%)<br/>IVH grade 3-4 n=0 p= not significant</p> <p><b>Hearing disability</b></p> <p>No IVH n=5 (2.3%)<br/>IVH grade 3-4 n=0 p= not significant</p> <p><b>School performance at 5 years</b></p> <p><b>Special education</b></p> <p>No IVH n=17 (8.7%)<br/>IVH grade 3-4 n=3 (20%) p=0.02</p> <p><b>School performance at 9 years</b></p> <p><b>Slow learner</b></p> <p>No IVH n=57 (29.5%)<br/>IVH grade 3-4 n=4 (26.7%)</p> <p><b>Special education</b></p> <p>No IVH n=29 (15%)<br/>IVH grade 3-4 n=4 (26.7%) p=0.04</p> <p><b>School performance at 14 years</b></p> <p><b>Slow learner</b></p> <p>No IVH n=93 (44.1%)<br/>IVH grade 3-4 n=4 (23.5%)</p> <p><b>Special education</b></p> <p>No IVH n=26 (12%)<br/>IVH grade 3-4 n=6 (35.3%) p=0.00</p> <p><b>Need for special education at 14 years</b></p> <p>IVH (all grades)<br/>OR 2.56 95%CI (1.17-4.86)<br/>aOR 2.33 95%CI (1.15, 4.75)</p> <p>IVH grade 3-4<br/>aOR 3.99 95%CI (1.36, 11.69)</p> |
| 25 | Van Den Hout 2000 <sup>36</sup><br>Netherlands<br>Prospective cohort | <p><b>Population</b></p> <ul style="list-style-type: none"> <li>Mean gestation 28-30 weeks</li> <li>Born 1989-1991</li> </ul> <p><b>Exposure</b></p> <ul style="list-style-type: none"> <li>IVH (n=17)</li> <li>PVL (n=12)</li> </ul> <p><b>Comparator (n=17)</b></p> <ul style="list-style-type: none"> <li>Preterm</li> <li>Normal cranial ultrasound</li> </ul> <p><b>Ascertainment/ definition</b></p> <ul style="list-style-type: none"> <li>Ultrasound diagnosis</li> <li>Modified Levene and DeVries classification for IVH</li> <li>DeVries classification for PVL</li> </ul>                                                                                                                                                                 | <p><b>Outcomes</b></p> <ul style="list-style-type: none"> <li>Cognitive</li> <li>Visual acuity</li> </ul> <p><b>Measurement/ assessment</b></p> <ul style="list-style-type: none"> <li>L94 visual-perceptual ability test</li> <li>Grating acuity cards</li> <li>McCarthy scales of children's abilities</li> <li>Wechsler preschool and primary scale of intelligence</li> <li>Snijders-Oomen non-verbal intelligence test</li> <li>Leiden Diagnostic test</li> </ul> <p><b>Follow-up</b></p> <ul style="list-style-type: none"> <li>Mean 5.3 years</li> <li>88% follow-up</li> </ul>                                                                                                                                        | <p><b>Total intelligence quotient, mean (SD)</b></p> <p>IVH 92.4 (16.3)<br/>PVL 79.6 (20.5)<br/>No brain injury 102.8 (14.4)</p> <p><b>IQ &lt;85</b></p> <p>IVH n=6, 35.3%<br/>PVL n=6, 50%<br/>No brain injury n=2, 11.8%</p> <p><b>Performance age in years, mean (SD)</b></p> <p>IVH 5.22 (1.16)<br/>PVL 4.37 (1.19)<br/>No brain injury 6.22 (0.89)</p> <p><b>Visual grating acuity in c/deg, mean (SD)</b></p> <p>IVH 37.4 (13.5)<br/>PVL 33.5 (15.9)</p>                                                                                                                                                                                                                                                                                                                                                                                                                                                                                                                                                                                                                                                                                                                                                                                                                                                                                                                                                                      |

|      |                                                                       |                                                                                                                                                                                                                                                                                                                                                                                                                                                                                                                                                                                                                                                                                                                                    |                                                                                                                                                                                                                                                                                                                                                                                                                                                                                                                                                                                                                                     |                                                                                                                                                                                                                                                                                                                                                                                                                                                                                                                                                                                                                                                                                                                                                                                                                                                                                                                                                                                                                                                                                                                                                                                                                                                                                                                                                                                                                                                                                                                                                                                                                                                                                                                                                                                                                |
|------|-----------------------------------------------------------------------|------------------------------------------------------------------------------------------------------------------------------------------------------------------------------------------------------------------------------------------------------------------------------------------------------------------------------------------------------------------------------------------------------------------------------------------------------------------------------------------------------------------------------------------------------------------------------------------------------------------------------------------------------------------------------------------------------------------------------------|-------------------------------------------------------------------------------------------------------------------------------------------------------------------------------------------------------------------------------------------------------------------------------------------------------------------------------------------------------------------------------------------------------------------------------------------------------------------------------------------------------------------------------------------------------------------------------------------------------------------------------------|----------------------------------------------------------------------------------------------------------------------------------------------------------------------------------------------------------------------------------------------------------------------------------------------------------------------------------------------------------------------------------------------------------------------------------------------------------------------------------------------------------------------------------------------------------------------------------------------------------------------------------------------------------------------------------------------------------------------------------------------------------------------------------------------------------------------------------------------------------------------------------------------------------------------------------------------------------------------------------------------------------------------------------------------------------------------------------------------------------------------------------------------------------------------------------------------------------------------------------------------------------------------------------------------------------------------------------------------------------------------------------------------------------------------------------------------------------------------------------------------------------------------------------------------------------------------------------------------------------------------------------------------------------------------------------------------------------------------------------------------------------------------------------------------------------------|
|      |                                                                       |                                                                                                                                                                                                                                                                                                                                                                                                                                                                                                                                                                                                                                                                                                                                    |                                                                                                                                                                                                                                                                                                                                                                                                                                                                                                                                                                                                                                     | <p>No brain injury 47.1 (13.5)</p> <p><b>Visual grating acuity &lt;25c/deg (%)</b><br/>                 IVH (11.8)<br/>                 PVL (33.3)<br/>                 No brain injury (0)</p> <p><b>Impairment on each of the eight L94 tasks</b><br/> <b>Visual matching % (n)</b><br/>                 IVH 0 (17)<br/>                 PVL 0 (12)<br/>                 No brain injury 5.9 (17)</p> <p><b>Unconventional Object Views % (n)</b><br/>                 IVH 29.4 (17)<br/>                 PVL 41.7 (12)<br/>                 No brain injury 17.6 (17)</p> <p><b>De Vos task % (n)</b><br/>                 IVH 29.4 (17)<br/>                 PVL 41.7 (12)<br/>                 No brain injury 11.8 (17)</p> <p><b>Line Drawings Occluded by Noise% (n)</b><br/>                 IVH 6.3 (16)<br/>                 PVL 36.4 (11)<br/>                 No brain injury 0 (17)</p> <p><b>Line Drawings Occluded by Noise% (n)</b><br/>                 IVH 13.3 (15)<br/>                 PVL 25.0 (8)<br/>                 No brain injury 5.9 (17)</p> <p><b>Developmental test of visual motor integration % (n)</b><br/>                 IVH 0 (16)<br/>                 PVL 0 (7)<br/>                 No brain injury 0 (17)</p> <p><b>Matching block designs % (n)</b><br/>                 IVH 5.9 (17)<br/>                 PVL 20.0 (10)<br/>                 No brain injury 17.6 (17)</p> <p><b>Constructing block designs% (n)</b><br/>                 IVH 30.8 (13)<br/>                 PVL 80.0 (5)<br/>                 No brain injury 31.3 (16)</p> <p><b>Mean percentage of L94 tasks on which child is impaired (mean, SD; %)</b><br/>                 IVH 14.71 (17.81)<br/>                 PVL 32.04 (24.64)<br/>                 No brain injury 11.13 (9.79)</p> |
| 26 * | <p>Vollmer 2003<sup>16</sup></p> <p>UK</p> <p>Prospective cohort</p>  | <p><b>Population</b></p> <ul style="list-style-type: none"> <li>Gestation &lt;33 weeks</li> <li>Born 1983-1988</li> </ul> <p><b>Exposure</b></p> <ul style="list-style-type: none"> <li>IVH (n=159)</li> <li>Ventricular dilatation (n=32)</li> <li>IVH, PV flare, ventricular dilatation (n=164)</li> <li>Hydrocephalus (n=36)</li> <li>Haemorrhagic parenchymal infarction (HPI) (n=61)</li> <li>cPVL n=26</li> </ul> <p><b>Comparator (n=348)</b></p> <ul style="list-style-type: none"> <li>Unmatched</li> <li>Normal scan</li> </ul> <p><b>Ascertainment/ definition</b></p> <ul style="list-style-type: none"> <li>Ultrasound imaging reviewed by two experienced observers</li> <li>In-house classification used</li> </ul> | <p><b>Outcomes</b></p> <ul style="list-style-type: none"> <li>Neurodevelopmental impairment (composite)</li> <li>Visual impairment</li> <li>Hearing impairment</li> </ul> <p><b>Measurement/ assessment</b></p> <ul style="list-style-type: none"> <li>Structured neurologic examination</li> <li>Pure-tone audiogram</li> <li>Vision test (Snellen chart)</li> <li>Henderson-Stott TOMI</li> <li>Beery test of VMI</li> <li>WISC-R for children born 1983-1986</li> <li>WISC-III for children born 1987-1988</li> </ul> <p><b>Follow-up</b></p> <ul style="list-style-type: none"> <li>8 years</li> <li>91.7% follow-up</li> </ul> | <p><b>Neurodevelopmental status</b><br/> <b>Group A (&lt;28 weeks)</b><br/> <b>All impairments (n, %)</b><br/>                 GMH/IVH (5, 18%)<br/>                 Ventricular dilatation (4, 50%)<br/>                 GMH/IVH, flare, ventricular dilatation (19, 51%)<br/>                 Hydrocephalus (7, 78%)<br/>                 HPI (15, 100%)<br/>                 cPVL (4, 100%)<br/>                 No brain injury (12, 32%)</p> <p><b>Disabling impairments (n, %)</b><br/>                 GMH/IVH (1, 4%)<br/>                 Ventricular dilatation (0, 0%)<br/>                 GMH/IVH, flare, ventricular dilatation (9, 24%)<br/>                 Hydrocephalus (7, 78%)<br/>                 HPI (14, 93%)<br/>                 cPVL (3, 75%)<br/>                 No brain injury (3, 8%)</p> <p><b>Group B (28-32 weeks)</b><br/> <b>All impairments (n, %)</b><br/>                 GMH/IVH (16, 29%)<br/>                 Ventricular dilatation (5, 31%)<br/>                 GMH/IVH, flare, ventricular dilatation (30, 43%)<br/>                 Hydrocephalus (7, 54%)<br/>                 HPI (5, 83%)<br/>                 cPVL (9, 75%)<br/>                 No brain injury (67, 29%)</p> <p><b>Disabling impairments (n, %)</b><br/>                 GMH/IVH (5, 5%)<br/>                 Ventricular dilatation (1, 6%)<br/>                 GMH/IVH, flare, ventricular dilatation (16, 23%)<br/>                 Hydrocephalus (6, 46%)<br/>                 HPI (3, 50%)<br/>                 cPVL (6, 50%)<br/>                 No brain injury (14, 6%)</p>                                                                                                                                                                                                    |
| 27 * | <p>Vollmer 2006a<sup>21</sup></p> <p>UK</p> <p>Prospective cohort</p> | <p><b>Population</b></p> <ul style="list-style-type: none"> <li>Gestation &lt;33 weeks</li> <li>Born 1985-1991</li> </ul> <p><b>Exposure</b></p> <ul style="list-style-type: none"> <li>Bilateral brain lesions (n=201)</li> <li>Right-sided brain lesion (n=41)</li> </ul>                                                                                                                                                                                                                                                                                                                                                                                                                                                        | <p><b>Outcomes</b></p> <ul style="list-style-type: none"> <li>Motor</li> <li>Cognitive</li> <li>Cerebral palsy</li> <li>Visual</li> </ul>                                                                                                                                                                                                                                                                                                                                                                                                                                                                                           | <p><b>TOMI error score, mean (SD)</b><br/>                 Normal scan 2.78 (2.1)</p> <p>All left-sided lesions 4.3 (3.5)<br/>                 Left-sided non-parenchymal lesions 4.5 (3.8)<br/>                 Left-sided parenchymal lesions 3.7 (2.1)</p>                                                                                                                                                                                                                                                                                                                                                                                                                                                                                                                                                                                                                                                                                                                                                                                                                                                                                                                                                                                                                                                                                                                                                                                                                                                                                                                                                                                                                                                                                                                                                  |

|  |                                                                                                                                                                                                                                                                                                                                                                                                                                                                                                                                                                                                                                                                            |                                                                                                                                                                                                                                                                                                                |                                                                                                                                                                                                                                                                                                                                                                                                                                                                                                                                                                                                                                                                                                                                                                                                                                                                                                                                                                                                                                                                                                                                                                                                                                                                                                                                                                                                                                                                                                                                                                                                                                                                                                                                                                                                                                                                                                                                                                                                                                                                                                                                                                                                                                                                                                                                                                                                                                                                                                                                                                                                                                                                                                                                                                                                                                                                                                                                                                                                                                                                                                                                                                                                                                                                                                                                                                                                                                                                                                    |
|--|----------------------------------------------------------------------------------------------------------------------------------------------------------------------------------------------------------------------------------------------------------------------------------------------------------------------------------------------------------------------------------------------------------------------------------------------------------------------------------------------------------------------------------------------------------------------------------------------------------------------------------------------------------------------------|----------------------------------------------------------------------------------------------------------------------------------------------------------------------------------------------------------------------------------------------------------------------------------------------------------------|----------------------------------------------------------------------------------------------------------------------------------------------------------------------------------------------------------------------------------------------------------------------------------------------------------------------------------------------------------------------------------------------------------------------------------------------------------------------------------------------------------------------------------------------------------------------------------------------------------------------------------------------------------------------------------------------------------------------------------------------------------------------------------------------------------------------------------------------------------------------------------------------------------------------------------------------------------------------------------------------------------------------------------------------------------------------------------------------------------------------------------------------------------------------------------------------------------------------------------------------------------------------------------------------------------------------------------------------------------------------------------------------------------------------------------------------------------------------------------------------------------------------------------------------------------------------------------------------------------------------------------------------------------------------------------------------------------------------------------------------------------------------------------------------------------------------------------------------------------------------------------------------------------------------------------------------------------------------------------------------------------------------------------------------------------------------------------------------------------------------------------------------------------------------------------------------------------------------------------------------------------------------------------------------------------------------------------------------------------------------------------------------------------------------------------------------------------------------------------------------------------------------------------------------------------------------------------------------------------------------------------------------------------------------------------------------------------------------------------------------------------------------------------------------------------------------------------------------------------------------------------------------------------------------------------------------------------------------------------------------------------------------------------------------------------------------------------------------------------------------------------------------------------------------------------------------------------------------------------------------------------------------------------------------------------------------------------------------------------------------------------------------------------------------------------------------------------------------------------------------------|
|  | <ul style="list-style-type: none"> <li>Left-sided brain lesion (n=57)</li> </ul> <p>Brain lesion types</p> <p>Non-parenchymal:</p> <ul style="list-style-type: none"> <li>Uncomplicated IVH</li> </ul> <p>Parenchymal:</p> <ul style="list-style-type: none"> <li>Haemorrhagic parenchymal infarction (HPI)</li> <li>cPVL</li> <li>PV flare</li> </ul> <p><b>Comparator (n=369)</b></p> <ul style="list-style-type: none"> <li>Unmatched</li> <li>Normal ultrasound</li> </ul> <p><b>Ascertainment/ definition</b></p> <ul style="list-style-type: none"> <li>Ultrasound imaging reviewed by two experienced observers</li> <li>Modified Stewart classification</li> </ul> | <p><b>Measurement/ assessment</b></p> <ul style="list-style-type: none"> <li>Neurological examination (modified Amiel-Tison assessment)</li> <li>TOMI</li> <li>WISC-R</li> <li>Test of VMI</li> </ul> <p><b>Follow-up</b></p> <ul style="list-style-type: none"> <li>8 years</li> <li>80% follow-up</li> </ul> | <p>All right-sided lesions 3.5 (2.9)<br/> Right-sided non-parenchymal lesions 2.7 (1.8)<br/> Right-sided parenchymal lesions 4.9 (3.8)</p> <p>All bilateral lesions 4.5 (4.3)<br/> Bilateral non-parenchymal lesions 4.1 (3.7)<br/> Bilateral parenchymal lesions 4.9 (4.7)</p> <p>ANOVA for parenchymal lesions only p &lt;0.0001<br/> ANOVA including parenchymal and non-parenchymal lesions p &lt;0.0001<br/> ANOVA excluding parenchymal lesions, p &lt;0.0001</p> <p><b>VMI centile, mean (SD)</b><br/> Normal scan 59.2 (30.0)</p> <p>All left-sided lesions 40.3 (30.1)<br/> Left-sided non-parenchymal lesions 46.8 (31.0)<br/> Left-sided parenchymal lesions 21 (22)</p> <p>All right-sided lesions 60.2 (31.9)<br/> Right-sided non-parenchymal lesions 64.2 (30.2)<br/> Right-sided parenchymal lesions 54 (35)</p> <p>All bilateral lesions 46.0 (33.5)<br/> Bilateral non-parenchymal lesions 55.1 (32.1)<br/> Bilateral parenchymal lesions 38 (32)</p> <p>ANOVA for parenchymal lesions only p &lt;0.0001<br/> ANOVA including parenchymal and non-parenchymal lesions p &lt;0.0001<br/> ANOVA excluding parenchymal lesions reported as both p &lt;0.0001 and p=0.98<br/> Ω(potential error in the manuscript table)</p> <p><b>Cerebral palsy, n (%)</b><br/> Normal scan 2 (0.7%)</p> <p>All left-sided lesions 4 (9%)<br/> Left-sided non-parenchymal lesions 2 (6%)<br/> Left-sided parenchymal lesions 2 (16%)</p> <p>All right-sided lesions 2 (6%)<br/> Right-sided non-parenchymal lesions 1 (4%)<br/> Right-sided parenchymal lesions 1 (8%)</p> <p>All bilateral lesions 37 (21%)<br/> Bilateral non-parenchymal lesions 8 (10%)<br/> Bilateral parenchymal lesions 29 (31%)</p> <p>Chi-square for parenchymal and non-parenchymal lesions, p &lt;0.0001<br/> Chi-square excluding parenchymal lesions, p &lt;0.0001<br/> Chi-square for parenchymal lesions only, p &lt;0.0001<br/> ANOVA parenchymal lesions only, p &lt;0.0001</p> <p><b>Full scale IQ, mean (SD)</b><br/> Normal scan 101 (16)</p> <p>All left-sided lesions 93 (17)<br/> Left-sided non-parenchymal lesions 98 (15)<br/> Left-sided parenchymal lesions 80 (15)</p> <p>All right-sided lesions 102 (17)<br/> Right-sided non-parenchymal lesions 104 (15)<br/> Right-sided parenchymal lesions 100 (19)</p> <p>All bilateral lesions 91 (21)<br/> Bilateral non-parenchymal lesions 96(19)<br/> Bilateral parenchymal lesions 86 (22)</p> <p>ANOVA for parenchymal lesions only, p &lt;0.0001.<br/> ANOVA including parenchymal and non-parenchymal lesions, p &lt;0.0001.<br/> ANOVA excluding parenchymal lesions, p =0.137.</p> <p><b>Verbal IQ, mean (SD)</b><br/> Normal scan 103 (19)</p> <p>All left-sided lesions 98 (20)<br/> Left-sided non-parenchymal lesions 102 (20)<br/> Left-sided parenchymal lesions 85 (18)</p> <p>All right-sided lesions 107 (18)<br/> Right-sided non-parenchymal lesions 108 (16)<br/> Right-sided parenchymal lesions 107 (22)</p> <p>All bilateral lesions 96 (23)<br/> Bilateral non-parenchymal lesions 100 (20)<br/> Bilateral parenchymal lesions 91 (25)</p> <p>ANOVA for parenchymal lesions only, p &lt;0.0001<br/> ANOVA including parenchymal and non-parenchymal lesions, p &lt;0.0001<br/> ANOVA excluding parenchymal lesions, p =0.38</p> <p><b>Performance IQ, mean (SD)</b><br/> Normal scan 96 (15)</p> <p>All left-sided lesions 86 (16)<br/> Left-sided non-parenchymal lesions 90 (15)<br/> Left-sided parenchymal lesions 76 (15)</p> |
|--|----------------------------------------------------------------------------------------------------------------------------------------------------------------------------------------------------------------------------------------------------------------------------------------------------------------------------------------------------------------------------------------------------------------------------------------------------------------------------------------------------------------------------------------------------------------------------------------------------------------------------------------------------------------------------|----------------------------------------------------------------------------------------------------------------------------------------------------------------------------------------------------------------------------------------------------------------------------------------------------------------|----------------------------------------------------------------------------------------------------------------------------------------------------------------------------------------------------------------------------------------------------------------------------------------------------------------------------------------------------------------------------------------------------------------------------------------------------------------------------------------------------------------------------------------------------------------------------------------------------------------------------------------------------------------------------------------------------------------------------------------------------------------------------------------------------------------------------------------------------------------------------------------------------------------------------------------------------------------------------------------------------------------------------------------------------------------------------------------------------------------------------------------------------------------------------------------------------------------------------------------------------------------------------------------------------------------------------------------------------------------------------------------------------------------------------------------------------------------------------------------------------------------------------------------------------------------------------------------------------------------------------------------------------------------------------------------------------------------------------------------------------------------------------------------------------------------------------------------------------------------------------------------------------------------------------------------------------------------------------------------------------------------------------------------------------------------------------------------------------------------------------------------------------------------------------------------------------------------------------------------------------------------------------------------------------------------------------------------------------------------------------------------------------------------------------------------------------------------------------------------------------------------------------------------------------------------------------------------------------------------------------------------------------------------------------------------------------------------------------------------------------------------------------------------------------------------------------------------------------------------------------------------------------------------------------------------------------------------------------------------------------------------------------------------------------------------------------------------------------------------------------------------------------------------------------------------------------------------------------------------------------------------------------------------------------------------------------------------------------------------------------------------------------------------------------------------------------------------------------------------------------|

|     |                                                                        |                                                                                                                                                                                                                                                                                                                                                                                                                                                                                                                                                                                                                                                                                                                                      |                                                                                                                                                                                                                                                                                                                                                                                                                                                                          |                                                                                                                                                                                                                                                                                                                                                                                                                                                                                                                                                                                                                                                                                                                                                                                                                                                                                                                                                                                                                                                                                                                                                                                                                                                                                                                                                                                                                                                                                                                                                                                                                                                                                                                                                                                                                                                                   |
|-----|------------------------------------------------------------------------|--------------------------------------------------------------------------------------------------------------------------------------------------------------------------------------------------------------------------------------------------------------------------------------------------------------------------------------------------------------------------------------------------------------------------------------------------------------------------------------------------------------------------------------------------------------------------------------------------------------------------------------------------------------------------------------------------------------------------------------|--------------------------------------------------------------------------------------------------------------------------------------------------------------------------------------------------------------------------------------------------------------------------------------------------------------------------------------------------------------------------------------------------------------------------------------------------------------------------|-------------------------------------------------------------------------------------------------------------------------------------------------------------------------------------------------------------------------------------------------------------------------------------------------------------------------------------------------------------------------------------------------------------------------------------------------------------------------------------------------------------------------------------------------------------------------------------------------------------------------------------------------------------------------------------------------------------------------------------------------------------------------------------------------------------------------------------------------------------------------------------------------------------------------------------------------------------------------------------------------------------------------------------------------------------------------------------------------------------------------------------------------------------------------------------------------------------------------------------------------------------------------------------------------------------------------------------------------------------------------------------------------------------------------------------------------------------------------------------------------------------------------------------------------------------------------------------------------------------------------------------------------------------------------------------------------------------------------------------------------------------------------------------------------------------------------------------------------------------------|
|     |                                                                        |                                                                                                                                                                                                                                                                                                                                                                                                                                                                                                                                                                                                                                                                                                                                      |                                                                                                                                                                                                                                                                                                                                                                                                                                                                          | <p>All right-sided lesions 95 (16)<br/>Right-sided non-parenchymal lesions 98 (13)<br/>Right-sided parenchymal lesions 92 (19)</p> <p>All bilateral lesions 85 (22)<br/>Bilateral non-parenchymal lesions 91 (20)<br/>Bilateral parenchymal lesions 80 (21)</p> <p>ANOVA for parenchymal lesions only, <math>p &lt; 0.0001</math><br/>ANOVA including parenchymal and non-parenchymal lesions, <math>p &lt; 0.0001</math><br/>ANOVA excluding parenchymal lesions, <math>p = 0.59</math></p>                                                                                                                                                                                                                                                                                                                                                                                                                                                                                                                                                                                                                                                                                                                                                                                                                                                                                                                                                                                                                                                                                                                                                                                                                                                                                                                                                                      |
| 28* | <p>Vollmer 2006b<sup>27</sup></p> <p>UK</p> <p>Prospective cohort</p>  | <p><b>Population</b></p> <ul style="list-style-type: none"> <li>Gestation &lt;33 weeks</li> <li>Born 1979-1991</li> </ul> <p><b>Exposure (n=66)</b></p> <ul style="list-style-type: none"> <li>Ventricular dilatation and IVH</li> </ul> <p><b>Comparator (n=616)</b></p> <ul style="list-style-type: none"> <li>Unmatched</li> <li>Normal cranial ultrasound</li> </ul> <p><b>Ascertainment/ definition</b></p> <ul style="list-style-type: none"> <li>Ultrasound imaging reviewed by two experienced observers</li> <li>In-house classification used</li> </ul>                                                                                                                                                                    | <p><b>Outcomes</b></p> <ul style="list-style-type: none"> <li>Neurological impairment with or without disability (composite)</li> <li>Cognitive</li> <li>Motor</li> <li>Vision</li> </ul> <p><b>Measurement/ assessment</b></p> <ul style="list-style-type: none"> <li>Structured neurological exam</li> <li>TOMI</li> <li>Test of VMI</li> <li>WISC</li> </ul> <p><b>Follow-up</b></p> <ul style="list-style-type: none"> <li>8 years</li> <li>81% follow-up</li> </ul> | <p><b>Disabling motor impairment, n (%)</b></p> <p>Ventricular dilatation and IVH n=10 (16%)<br/>Normal ultrasound n=10 (2%)</p> <p><b>Cognitive</b></p> <p><b>Full scale IQ, mean (SD)</b></p> <p>Ventricular dilatation and IVH 96 (23)<br/>Normal ultrasound 101 (17)</p> <p><b>Verbal IQ, mean (SD)</b></p> <p>Ventricular dilatation and IVH 101 (22)<br/>Normal ultrasound 104 (19)</p> <p><b>Performance IQ mean (SD)</b></p> <p>Ventricular dilatation and IVH 97 (15)<br/>Normal ultrasound 91 (21)</p> <p><b>Motor and vision</b></p> <p><b>VMI centile, mean (SD)</b></p> <p>Ventricular dilatation and IVH 37 (33)<br/>Normal ultrasound 52 (31)</p> <p><b>TOMI, mean (SD)</b></p> <p>Ventricular dilatation and IVH 5.98 (4.2)<br/>Normal ultrasound 3.26 (2.5)</p>                                                                                                                                                                                                                                                                                                                                                                                                                                                                                                                                                                                                                                                                                                                                                                                                                                                                                                                                                                                                                                                                                  |
| 29  | <p>Whitaker 2011<sup>30</sup></p> <p>USA</p> <p>Prospective cohort</p> | <p><b>Population</b></p> <ul style="list-style-type: none"> <li>Birthweight &lt;2000g</li> <li>'Non-disabled' survivors</li> <li>Born 1984-1987</li> </ul> <p><b>Exposure</b></p> <ul style="list-style-type: none"> <li>IVH (n=69)</li> <li>Parenchymal lesions and/or ventricular enlargement (n=21)</li> </ul> <p><b>Comparison (n=368)</b></p> <ul style="list-style-type: none"> <li>Unmatched</li> <li>Normal cranial ultrasound</li> </ul> <p><b>Ascertainment/ definition</b></p> <ul style="list-style-type: none"> <li>Ultrasound imaging reviewed by three blinded radiologists independently, disagreements resolved through consensus and inter-observer reliability checked.</li> <li>Paneth classification</li> </ul> | <p><b>Outcomes</b></p> <ul style="list-style-type: none"> <li>Mental health conditions</li> </ul> <p><b>Measurement/ assessment</b></p> <ul style="list-style-type: none"> <li>Parent report version of the Diagnostic Interview Schedule for Children-IV</li> <li>WASI</li> </ul> <p><b>Follow-up</b></p> <ul style="list-style-type: none"> <li>16 years</li> <li>72.9% follow-up</li> </ul>                                                                           | <p><b>Logistic regression assessing odds of current and lifetime mental health conditions after brain injury</b></p> <p><b>Current ADHD- inattentive type</b></p> <p><b>IVH</b><br/>OR 0.97 95% CI (0.21-4.47)<br/>aOR 1.01 95% CI (0.19-5.44)</p> <p><b>Parenchymal lesions and/or ventricular enlargement</b><br/>OR 7.64<sup>9</sup> 95% CI (2.20-24.48)<br/>aOR 6.83<sup>9</sup> 95% CI (1.26-36.91)</p> <p><b>Lifetime ADHD - inattentive type</b></p> <p><b>IVH</b><br/>OR 0.83 95% CI (0.34-2.04)<br/>aOR 0.64 95% CI (0.24-1.74)</p> <p><b>Parenchymal lesions and/or ventricular enlargement</b><br/>OR 2.71 95% CI (0.94-7.82)<br/>aOR 1.13 95% CI (0.31-4.10)</p> <p><b>Current major depression</b></p> <p><b>IVH</b><br/>OR 2.66 95% CI (1.04-6.78)<br/>aOR 2.23 95% CI (0.80-6.24)</p> <p><b>Lifetime major depression</b></p> <p><b>IVH</b><br/>OR 2.76 95% CI (1.19-6.38)<br/>aOR 2.59 95% CI (1.02-6.58)</p> <p><b>Current tic disorders</b></p> <p><b>IVH</b><br/>OR 1.63 95% CI (0.44-6.07)<br/>aOR 1.89 95% CI (0.42-8.57)</p> <p><b>Parenchymal lesions and/or ventricular enlargement</b><br/>OR 8.42 95% CI (2.40-29.62)<br/>aOR 9.77 95% CI (1.69-56.47)</p> <p><b>Lifetime tic disorders</b></p> <p><b>IVH</b><br/>OR 0.95 95% CI (0.27-3.34)<br/>aOR 0.85 95% CI (0.21-3.51)</p> <p><b>Parenchymal lesions and/or ventricular enlargement</b><br/>OR 5.07 95% CI (1.53-16.82)<br/>aOR 5.02 95% CI (1.05-23.92)</p> <p><b>Current obsessive-compulsive disorder</b></p> <p><b>IVH</b><br/>OR 9.52 95% CI (3.02-30.06)<br/>aOR 11.85 95% CI (3.22-43.62)</p> <p><b>Parenchymal lesions and/or ventricular enlargement</b><br/>OR 7.64 95% CI (1.39-41.98)<br/>aOR 15.32 95% CI (1.82-128.74)</p> <p><b>Lifetime obsessive compulsive disorder</b></p> <p><b>IVH</b><br/>OR 9.52 95% CI (3.05-30.06)<br/>aOR 11.85 95% CI (3.22-43.62)</p> |

|                  |                                                                         |                                                                                                                                                                                                                                                                                                                                                                                                                                                                                                                                                                                                                                                                                                                                                                                                                                                                                                |                                                                                                                                                                                                                                                                                                                                                                                                                                                                                                                                                                               |                                                                                                                                                                                                                                                                                                                                                                                                                                                                                                                                                                                                                                                                                                                                                                                                                                                                                                                                                                                                                                                                                                                          |
|------------------|-------------------------------------------------------------------------|------------------------------------------------------------------------------------------------------------------------------------------------------------------------------------------------------------------------------------------------------------------------------------------------------------------------------------------------------------------------------------------------------------------------------------------------------------------------------------------------------------------------------------------------------------------------------------------------------------------------------------------------------------------------------------------------------------------------------------------------------------------------------------------------------------------------------------------------------------------------------------------------|-------------------------------------------------------------------------------------------------------------------------------------------------------------------------------------------------------------------------------------------------------------------------------------------------------------------------------------------------------------------------------------------------------------------------------------------------------------------------------------------------------------------------------------------------------------------------------|--------------------------------------------------------------------------------------------------------------------------------------------------------------------------------------------------------------------------------------------------------------------------------------------------------------------------------------------------------------------------------------------------------------------------------------------------------------------------------------------------------------------------------------------------------------------------------------------------------------------------------------------------------------------------------------------------------------------------------------------------------------------------------------------------------------------------------------------------------------------------------------------------------------------------------------------------------------------------------------------------------------------------------------------------------------------------------------------------------------------------|
|                  |                                                                         |                                                                                                                                                                                                                                                                                                                                                                                                                                                                                                                                                                                                                                                                                                                                                                                                                                                                                                |                                                                                                                                                                                                                                                                                                                                                                                                                                                                                                                                                                               | <p><b>Parenchymal lesions and/or ventricular enlargement</b><br/>OR 7.64 95% CI (1.39-41.98)<br/>aOR 15.32 95% CI (1.82-128.74)</p> <p><b>Current diagnoses additionally controlled for full score IO and motor function</b></p> <p><b>ADHD inattentive type</b></p> <p><b>IVH</b><br/>OR 0.86 95% CI (0.18-3.99)<br/>aOR 0.99 95% CI (0.21-4.62)</p> <p><b>Parenchymal lesions and/or ventricular enlargement</b><br/>OR 5.04 95% CI (1.36-18.65)<br/>aOR 5.43 95% CI (1.32-22.40)</p> <p><b>Major depression</b></p> <p><b>IVH</b><br/>OR 0.43 95% CI (0.16-1.11)<br/>aOR 0.40 95% CI (0.15-1.05)</p> <p><b>Tic disorders</b></p> <p><b>IVH</b><br/>OR 1.54 95% CI (0.41-5.78)<br/>aOR 1.45 95% CI (0.38-5.48)</p> <p><b>Parenchymal lesions and/or ventricular enlargement</b><br/>OR 7.01 95% CI (1.88-28.14)<br/>aOR 4.38 95% CI (1.05-18.23)</p> <p><b>Obsessive compulsive disorder</b></p> <p><b>IVH</b><br/>OR 8.68 95% CI (2.72-27.69)<br/>aOR 10.91 95% CI (3.13-37.99)</p> <p><b>Parenchymal lesions and/or ventricular enlargement</b><br/>OR 4.78 95% CI (0.83-28.10)<br/>aOR 3.58 95% CI (0.50-25.94)</p> |
| Perinatal stroke |                                                                         |                                                                                                                                                                                                                                                                                                                                                                                                                                                                                                                                                                                                                                                                                                                                                                                                                                                                                                |                                                                                                                                                                                                                                                                                                                                                                                                                                                                                                                                                                               |                                                                                                                                                                                                                                                                                                                                                                                                                                                                                                                                                                                                                                                                                                                                                                                                                                                                                                                                                                                                                                                                                                                          |
| 30               | Ballantyne *<br>2007 <sup>41</sup><br>USA<br><br>Prospective cohort     | <p><b>Population</b></p> <ul style="list-style-type: none"> <li>• Mean gestation 38.5 weeks</li> <li>• Born 1991-2001</li> </ul> <p><b>Exposure (n=28)</b></p> <ul style="list-style-type: none"> <li>• Left lesions (n=17)</li> <li>• Right lesions (n=11)</li> </ul> <p><b>Comparator (n=57)</b></p> <ul style="list-style-type: none"> <li>• Unmatched</li> <li>• Healthy controls with normal medical and developmental histories</li> <li>• Recruited from the community</li> </ul> <p><b>Ascertainment/ definition</b></p> <ul style="list-style-type: none"> <li>• Single unilateral lesions the result of perinatal strokes occurring between 28 weeks' gestation and 28 days after birth: infarct or haemorrhage</li> <li>• Identified through medical history and neuroimaging</li> <li>• Severity rated on a 5-point scale adapted from the Vargha-Khadem classification</li> </ul> | <p><b>Outcomes</b></p> <ul style="list-style-type: none"> <li>• Speech and language</li> </ul> <p><b>Assessment/ measurement</b></p> <ul style="list-style-type: none"> <li>• CELF-R</li> <li>• Wechsler Intelligence Scales (WPPSI-R, WISC-R, or WISC-III)</li> <li>• PPVT-Revised</li> <li>• Expressive One-Word Picture Vocabulary Test-Revised or Upper-Extension</li> <li>• Total Language Standard Scores</li> </ul> <p><b>Follow-up</b></p> <ul style="list-style-type: none"> <li>• 6-9 years</li> <li>• 100% follow-up</li> </ul>                                    | <p><b>Speech and language</b></p> <p><b>CELF-R Receptive, mean (SD)</b><br/>All strokes: 82.54 (17.12) p&lt;.0001<br/>Left stroke: 83.18 (16.66) p&lt;.0001<br/>Right stroke: 81.55 (18.59) p=0.001<br/>Control: 106.37 (12.51)</p> <p><b>CELF-R Expressive mean (SD)</b><br/>All strokes: 73.75 (16.79) p&lt;.0001<br/>Left stroke: 73.06 (14.88) p&lt;.0001<br/>Right stroke: 74.82 (20.11) p=0.001<br/>Control: 101.02 (13.63)</p> <p><b>CELF-R Total mean (SD)</b><br/>All strokes: 76.93 (17.31) p&lt;.0001<br/>Left stroke: 76.94 (15.39) p&lt;.0001<br/>Right stroke: 76.91 (20.74) p=0.001<br/>Control: 104.00 (12.58)</p>                                                                                                                                                                                                                                                                                                                                                                                                                                                                                       |
| 31               | Ballantyne<br>2008 <sup>34</sup> *<br><br>USA<br><br>Prospective cohort | <p><b>Population</b></p> <ul style="list-style-type: none"> <li>• 32- 40 weeks' gestation</li> <li>• Birth years not reported</li> </ul> <p><b>Exposure (n=29)</b></p> <ul style="list-style-type: none"> <li>• Left hemisphere (n=20)</li> <li>• Right hemisphere (n=9)</li> </ul> <p><b>Control (n=38)</b></p> <ul style="list-style-type: none"> <li>• Healthy controls (normal neurodevelopment)</li> <li>• Recruited through a university and community adverts</li> </ul> <p><b>Ascertainment/ definition</b></p> <ul style="list-style-type: none"> <li>• Unilateral ischaemic perinatal stroke confirmed through clinical history and neuroimaging</li> <li>• Lesion location and severity reviewed by blinded neuroradiologist</li> <li>• Severity rated on a 5-point scale adapted from the Vargha-Khadem classification</li> </ul>                                                  | <p><b>Outcomes</b></p> <ul style="list-style-type: none"> <li>• Cognitive (academic skills)</li> <li>• Speech and language</li> <li>• Motor</li> <li>• Cerebral palsy</li> <li>• Vision</li> <li>• Epilepsy</li> </ul> <p><b>Measurement/ assessment</b></p> <ul style="list-style-type: none"> <li>• WISC- Revised</li> <li>• WRAT- Revised</li> <li>• CELF- Revised</li> <li>• PPVT-Revised</li> <li>• WPPSI/WPPSI- Revised</li> <li>• WISC-III</li> </ul> <p><b>Follow-up</b></p> <ul style="list-style-type: none"> <li>• 7-12 years</li> <li>• 100% follow up</li> </ul> | <p><b>Hemiparesis</b><br/>Stroke n=18,62%</p> <p><b>Visual field deficit</b><br/>Stroke n=7, 26%</p> <p><b>Seizures</b><br/>Stroke n=11, 38%</p> <p><b>Cognitive, mean (SD)</b><br/><b>Verbal IQ (WISC-R)</b><br/><b>Time point 1 (mean age 7-8 years)</b><br/>Stroke 96.6 (20.5)<br/>Control 126.1 (16)</p> <p><b>Time point 2 (mean age 10 – 12 years)</b><br/>Stroke 98.7 (20)<br/>Control 123.6 (13.1)<br/>Between group affect (stroke vs. control) p&lt;0.0001<br/>Time effect not significant</p> <p><b>Performance IQ (WISC-R)</b><br/><b>Time point 1 (mean age 7-8 years)</b><br/>Stroke 92.8 (19.9)<br/>Control 115.2 (13.8)</p> <p><b>Time point 2 (mean age 10 – 12 years)</b><br/>Stroke 93.5 (20)<br/>Control 116 (10.5)<br/>Between group affect (stroke vs. control) p=0.002<br/>Time effect not significant</p> <p><b>Full scale IQ (WISC-R)</b></p>                                                                                                                                                                                                                                                   |



|    |                                |                                                                                                                                         |                                                                                                                                                 |                                                                                                                                                                                                                                                                                                                                                                                                                                                                                                                                                                                                                                                                                                                                                                                                                                                                                                                                                                                                                                                                                                                                                                                                                                                                                                                                                                                                                                                                                                                                                                                                                                                                                                                                                                                                                                                                                                                                                                                                                                                                                                                                                                                                                                                                                                                                                                                                                                                                                                                                                                                                                                                                     |
|----|--------------------------------|-----------------------------------------------------------------------------------------------------------------------------------------|-------------------------------------------------------------------------------------------------------------------------------------------------|---------------------------------------------------------------------------------------------------------------------------------------------------------------------------------------------------------------------------------------------------------------------------------------------------------------------------------------------------------------------------------------------------------------------------------------------------------------------------------------------------------------------------------------------------------------------------------------------------------------------------------------------------------------------------------------------------------------------------------------------------------------------------------------------------------------------------------------------------------------------------------------------------------------------------------------------------------------------------------------------------------------------------------------------------------------------------------------------------------------------------------------------------------------------------------------------------------------------------------------------------------------------------------------------------------------------------------------------------------------------------------------------------------------------------------------------------------------------------------------------------------------------------------------------------------------------------------------------------------------------------------------------------------------------------------------------------------------------------------------------------------------------------------------------------------------------------------------------------------------------------------------------------------------------------------------------------------------------------------------------------------------------------------------------------------------------------------------------------------------------------------------------------------------------------------------------------------------------------------------------------------------------------------------------------------------------------------------------------------------------------------------------------------------------------------------------------------------------------------------------------------------------------------------------------------------------------------------------------------------------------------------------------------------------|
|    |                                |                                                                                                                                         |                                                                                                                                                 | <p><b>Time point 1 (mean age 7-8 years)</b><br/>Stroke 94.7 (20.4)<br/>Control 123 (15)</p> <p><b>Time point 2 (mean age 10 – 12 years)</b><br/>Stroke 96.1 (19.1)<br/>Control 122.3 (10.2)</p> <p>Between group affect (stroke vs. control) p&lt;0.0001<br/>Time effect not significant</p> <p><b>Reading (WRAT -R)</b><br/><b>Time point 1 (mean age 7-8 years)</b><br/>Stroke 85 (16.1)<br/>Control 113 (13.3)</p> <p><b>Time point 2 (mean age 10 – 12 years)</b><br/>Stroke 89.4 (13.3)<br/>Control 108.9 (13.8)</p> <p>Between group affect (stroke vs. control) p&lt;0.0001<br/>Time effect not significant<br/>Time group interaction p=0.045</p> <p><b>Spelling (WRAT -R)</b><br/><b>Time point 1 (mean age 7-8 years)</b><br/>Stroke 82.5 (18.2)<br/>Control 106.2 (15.9)</p> <p><b>Time point 2 (mean age 10 – 12 years)</b><br/>Stroke 87 (16.8)<br/>Control 104.6 (13.1)</p> <p>Between group affect (stroke vs. control) p=0.001<br/>Time effect not significant</p> <p><b>Arithmetic (WRAT -R)</b><br/><b>Time point 1 (mean age 7-8 years)</b><br/>Stroke 91.5 (10.2)<br/>Control 111.9 (11.2)</p> <p><b>Time point 2 (mean age 10 – 12 years)</b><br/>Stroke 94.2 (18.7)<br/>Control 113.1 (16.2)</p> <p>Between group affect (stroke vs. control) p&lt;0.0001<br/>Time effect not significant</p> <p><b>Speech and language</b><br/><b>Receptive language score</b><br/><b>Time point 1 (mean age 7-8 years)</b><br/>Stroke 84.2 (10.9)<br/>Control 109.1 (12.2)</p> <p><b>Time point 2 (mean age 10 – 12 years)</b><br/>Stroke 82.3 (20.1)<br/>Control 111.4 (13.7)</p> <p>Between group affect (stroke vs. control) p&lt;0.0001<br/>Time effect not significant</p> <p><b>Expressive language score</b><br/><b>Time point 1 (mean age 7-8 years)</b><br/>Stroke 72.5 (12)<br/>Control 101 (17.5)</p> <p><b>Time point 2 (mean age 10 – 12 years)</b><br/>Stroke 78.4 (16)<br/>Control 105.8 (11.9)</p> <p>Between group affect (stroke vs. control) p&lt;0.0001<br/>Time effect p=0.017</p> <p><b>Total language score</b><br/><b>Time point 1 (mean age 7-8 years)</b><br/>Stroke 76.9 (11.1)<br/>Control 105.6 (14.2)</p> <p><b>Time point 2 (mean age 10 – 12 years)</b><br/>Stroke 79.1 (18.3)<br/>Control 109.8 (14)</p> <p>Between group affect (stroke vs. control) p&lt;0.0001<br/>Time effect not significant</p> <p><b>Vocabulary score</b><br/><b>Time point 1 (mean age 7-8 years)</b><br/>Stroke 97.5 (19.7)<br/>Control 117.1 (17)</p> <p><b>Time point 2 (mean age 10 – 12 years)</b><br/>Stroke 99.9 (20)<br/>Control 118.9 (13.9)</p> <p>Between group affect (stroke vs. control) p=0.002<br/>Time effect not significant</p> |
| 32 | Gold 2014 <sup>35</sup><br>USA | <p><b>Population</b></p> <ul style="list-style-type: none"> <li>• Gestation not provided</li> <li>• Birth years not provided</li> </ul> | <p><b>Outcomes</b></p> <ul style="list-style-type: none"> <li>• Cognitive (IQ and memory)</li> <li>• Motor</li> <li>• Cerebral palsy</li> </ul> | <p><b>Cognitive</b><br/><b>Memory</b><br/><b>Stories immediate recall</b><br/>Controls, mean (SE)13.5 (0.7)</p>                                                                                                                                                                                                                                                                                                                                                                                                                                                                                                                                                                                                                                                                                                                                                                                                                                                                                                                                                                                                                                                                                                                                                                                                                                                                                                                                                                                                                                                                                                                                                                                                                                                                                                                                                                                                                                                                                                                                                                                                                                                                                                                                                                                                                                                                                                                                                                                                                                                                                                                                                     |

|    |                                                            |                                                                                                                                                                                                                                                                                                                                                                                                                                                                                                                                                                                                                                                                                                                                                                                                                                                                                                      |                                                                                                                                                                                                                                                                                                                                                                                                                                                                                 |                                                                                                                                                                                                                                                                                                                                                                                                                                                                                                                                                                                                                                                                                                                                                                                                                                                                                                                                                                                                                                                                                                                                                                                                                                                                                                                                                                                                                                                                                                                                                                                                                                                                                                                                                                                                                                                                                                                                                                                                                                                                                                                                                                                          |
|----|------------------------------------------------------------|------------------------------------------------------------------------------------------------------------------------------------------------------------------------------------------------------------------------------------------------------------------------------------------------------------------------------------------------------------------------------------------------------------------------------------------------------------------------------------------------------------------------------------------------------------------------------------------------------------------------------------------------------------------------------------------------------------------------------------------------------------------------------------------------------------------------------------------------------------------------------------------------------|---------------------------------------------------------------------------------------------------------------------------------------------------------------------------------------------------------------------------------------------------------------------------------------------------------------------------------------------------------------------------------------------------------------------------------------------------------------------------------|------------------------------------------------------------------------------------------------------------------------------------------------------------------------------------------------------------------------------------------------------------------------------------------------------------------------------------------------------------------------------------------------------------------------------------------------------------------------------------------------------------------------------------------------------------------------------------------------------------------------------------------------------------------------------------------------------------------------------------------------------------------------------------------------------------------------------------------------------------------------------------------------------------------------------------------------------------------------------------------------------------------------------------------------------------------------------------------------------------------------------------------------------------------------------------------------------------------------------------------------------------------------------------------------------------------------------------------------------------------------------------------------------------------------------------------------------------------------------------------------------------------------------------------------------------------------------------------------------------------------------------------------------------------------------------------------------------------------------------------------------------------------------------------------------------------------------------------------------------------------------------------------------------------------------------------------------------------------------------------------------------------------------------------------------------------------------------------------------------------------------------------------------------------------------------------|
|    | Prospective cohort                                         | <p><b>Exposure (n=27)</b></p> <ul style="list-style-type: none"> <li>Right-sided stroke (n=12)</li> <li>Left-sided stroke (n=15)</li> </ul> <p><b>Comparator (n=19)</b></p> <ul style="list-style-type: none"> <li>Matched for age at follow up, sex, socioeconomic group and maternal education</li> <li>Healthy controls</li> <li>Recruited through local advertising</li> </ul> <p><b>Ascertainment/ definition</b></p> <ul style="list-style-type: none"> <li>Single, unilateral brain lesion in an arterial vascular distribution, either identified in the neonatal period with neuroimaging, or identified later in infancy after presentation with a hemiparesis and imaging documentation of an old unilateral infarct (presumed perinatal stroke)</li> <li>Recruited from paediatric neurology clinics</li> <li>Severity graded 1-5 using Trauner/Vargha-Khaldem classification</li> </ul> | <p><b>Measurement/ assessment</b></p> <ul style="list-style-type: none"> <li>WISC-III</li> <li>Dots and Stories subtests of the Children's Memory Scales</li> </ul> <p><b>Follow-up</b></p> <ul style="list-style-type: none"> <li>6-16 years</li> <li>100% follow-up</li> </ul>                                                                                                                                                                                                | <p>Stroke, mean (SE) 8.4 (0.8) p&lt;0.001</p> <p>Stroke and seizures, mean (SE) 7 (0.8)</p> <p>Stroke and no seizures, mean (SE) 10.1 (1.4) p=0.06</p> <p>Right lesion, mean (SE) 7.8 (1.1)</p> <p>Left lesion, mean (SE) 8.9 (1.2) p=0.51</p> <p><b>Delayed recall</b></p> <p>Controls, mean (SE) 13.9 (0.8)</p> <p>Stroke, mean (SE) 7.9 (0.8) p&lt;0.001</p> <p>Stroke and seizures, mean (SE) 6.2 (0.9)</p> <p>Stroke and no seizures, mean (SE) 10 (1.2) p=0.02</p> <p>Right lesion, mean (SE) 7.3 (1.1)</p> <p>Left lesion, mean (SE) 8.3 (1.2) p=0.56</p> <p><b>Delayed recognition</b></p> <p>Controls, mean (SE) 11.5 (0.5)</p> <p>Stroke, mean (SE) 8 (0.8) p=0.001</p> <p>Stroke and seizures, mean (SE) 7.1 (1.1)</p> <p>Stroke and no seizures, mean (SE) 9.2 (0.9) p=0.17</p> <p>Right lesion, mean (SE) 8.3 (1.4)</p> <p>Left lesion, mean (SE) 7.9 (0.9) p=0.8</p> <p><b>Dots learning</b></p> <p>Controls, mean (SE) 10.9 (0.5)</p> <p>Stroke, mean (SE) 8.9 (0.8) p=0.05</p> <p>Stroke and seizures, mean (SE) 7.6 (1.1)</p> <p>Stroke and no seizures, mean (SE) 10.6 (0.8) p=0.05</p> <p>Right lesion, mean (SE) 9.3 (1.4)</p> <p>Left lesion, mean (SE) 8.7 (0.9) p=0.71</p> <p><b>Total</b></p> <p>Controls, mean (SE) 11.8 (0.5)</p> <p>Stroke, mean (SE) 9 (0.7) p=0.003</p> <p>Stroke and seizures, mean (SE) 7.8 (0.9)</p> <p>Stroke and no seizures, mean (SE) 10.6 (0.9) p=0.04</p> <p>Right lesion, mean (SE) 9.2 (0.7)</p> <p>Left lesion, mean (SE) 10.2 (0.7) p=0.62</p> <p><b>Delayed recall</b></p> <p>Controls, mean (SE) 12.6 (0.4)</p> <p>Stroke, mean (SE) 10 (0.5) p&lt;0.001</p> <p>Stroke and seizures, mean (SE) 8.8 (0.5)</p> <p>Stroke and no seizures, mean (SE) 11.4 (0.8) p=0.009</p> <p>Right lesion, mean (SE) 9.7 (0.7)</p> <p>Left lesion, mean (SE) 10.2 (0.7) p=0.62</p> <p><b>WISC- III IQ, mean (SD)</b></p> <p>Right stroke, 85.0 (6)</p> <p>Left stroke, 91 (6) p=0.49</p> <p><b>IQ scores</b></p> <p>Controls 117 (2.7)</p> <p>All stroke patients 88 (4.0) p&lt;0.001</p> <p>No seizures 100 (6.4)</p> <p>Seizures 78 (3.7)</p> <p><b>Motor (hemiparesis)</b></p> <p>Stroke patients n=16; 59%</p> <p>Control n=0; p=0.05</p> |
| 33 | Kolk 2011 <sup>36</sup><br>Estonia<br>Retrospective cohort | <p><b>Population</b></p> <ul style="list-style-type: none"> <li>Gestation not provided</li> <li>Born 1995-2006</li> </ul> <p><b>Exposed (n=21)</b></p> <ul style="list-style-type: none"> <li>Neonatal stroke</li> </ul> <p><b>Control (n=31)</b></p> <ul style="list-style-type: none"> <li>Matched on age and sex</li> <li>Healthy children</li> <li>Recruited locally</li> </ul> <p><b>Ascertainment/ definition</b></p> <ul style="list-style-type: none"> <li>Estonian stroke registry</li> <li>Arterial ischaemic stroke or haemorrhagic</li> </ul>                                                                                                                                                                                                                                                                                                                                            | <p><b>Outcomes</b></p> <ul style="list-style-type: none"> <li>Cognitive</li> <li>Neuropsychological</li> <li>Motor</li> <li>Cerebral palsy</li> <li>Speech and language</li> <li>Epilepsy</li> </ul> <p><b>Measurement/ assessment</b></p> <ul style="list-style-type: none"> <li>NEPSY</li> <li>Kaufman ABC</li> <li>Paediatric Stroke Outcome Measure</li> </ul> <p><b>Follow-up</b></p> <ul style="list-style-type: none"> <li>4-10 years</li> <li>100% follow-up</li> </ul> | <p><b>Neuromotor impairment (Paediatric Stroke Outcome Measure)</b></p> <p><b>Neonatal stroke</b></p> <p>Severe n=4, 19%</p> <p>Moderate n=9, 43%</p> <p>Good n=6, 28.6%</p> <p>Normal n=2, 9.5%</p> <p><b>Cognitive/ neuropsychological</b></p> <p><b>Attention and executive function, mean, SD, 95% CI</b></p> <p><b>Tower</b></p> <p>Control 0.22, 0.64 (-0.05, 0.48)</p> <p>Neonatal stroke -0.34, 1.34 (-1.03, 0.35) p=0.142</p> <p><b>Auditory attention</b></p> <p>Control 0.27, 0.72 (-0.03, 0.57)</p> <p>Neonatal stroke -0.38, 1.10 (-1.04, 0.28) p=0.009</p> <p><b>Visual attention: time</b></p> <p>Control 0.37, 0.81, (0.07, 0.67)</p> <p>Neonatal stroke -0.40, 0.93 (-0.82, 0.03) p=0.004</p> <p><b>Visual attention: correct</b></p> <p>Control 0.48, 0.50 (0.30, 0.67)</p> <p>Neonatal stroke -0.54, 0.97 (0.98, 0.1) p&lt;0.0001</p> <p><b>Statue</b></p>                                                                                                                                                                                                                                                                                                                                                                                                                                                                                                                                                                                                                                                                                                                                                                                                                                                                                                                                                                                                                                                                                                                                                                                                                                                                                                            |

|  |  |  |  |                                                                                                                                                                                                                                                                                                                                                                                                                                                                                                                                                                                                                                                                                                                                                                                                                                                                                                                                                                                                                                                                                                                                                                                                                                                                                                                                                                                                                                                                                                                                                                                                                                                                                                                                                                                                                                                                                                                                                                                                                                                                                                                                                                                                                                                                                                                                                                                                                                                                                                                                                                                                                                                                                                                                                                                                                                                                                                                                                                                                                                                                                                                                                                                                                                                                                                                                |
|--|--|--|--|--------------------------------------------------------------------------------------------------------------------------------------------------------------------------------------------------------------------------------------------------------------------------------------------------------------------------------------------------------------------------------------------------------------------------------------------------------------------------------------------------------------------------------------------------------------------------------------------------------------------------------------------------------------------------------------------------------------------------------------------------------------------------------------------------------------------------------------------------------------------------------------------------------------------------------------------------------------------------------------------------------------------------------------------------------------------------------------------------------------------------------------------------------------------------------------------------------------------------------------------------------------------------------------------------------------------------------------------------------------------------------------------------------------------------------------------------------------------------------------------------------------------------------------------------------------------------------------------------------------------------------------------------------------------------------------------------------------------------------------------------------------------------------------------------------------------------------------------------------------------------------------------------------------------------------------------------------------------------------------------------------------------------------------------------------------------------------------------------------------------------------------------------------------------------------------------------------------------------------------------------------------------------------------------------------------------------------------------------------------------------------------------------------------------------------------------------------------------------------------------------------------------------------------------------------------------------------------------------------------------------------------------------------------------------------------------------------------------------------------------------------------------------------------------------------------------------------------------------------------------------------------------------------------------------------------------------------------------------------------------------------------------------------------------------------------------------------------------------------------------------------------------------------------------------------------------------------------------------------------------------------------------------------------------------------------------------------|
|  |  |  |  | <p>Control 0.26, 0.77 (-0.03, 0.54)<br/>Neonatal stroke -0.23, 1.09, (-0.73, 0.28) p=0.086</p> <p><b>Design fluency</b><br/>Control 0.18, 1.04 (-0.25, 0.61)<br/>Neonatal stroke -0.36, 0.70 (-0.78, 0.06) p=0.06</p> <p><b>Knock and tap</b><br/>Control 0.31, 0.50 (0.10, 0.51)<br/>Neonatal stroke -0.44, 1.52, (-1.32, 0.43) p=0.03</p> <p><b>Language, mean, SD, 95% CI</b></p> <p><b>Phonological processing</b><br/>Control 0.24, 0.80 (-0.05, 0.54)<br/>Neonatal stroke -0.38, 0.99 (-0.83, 0.08) p=0.001</p> <p><b>Comprehension of instructions</b><br/>Control 0.43, 0.70 (0.18, 0.69)<br/>Neonatal stroke -0.59, 1.06 (-1.07, 0.11) p&lt;0.0001</p> <p><b>Speeded naming: time</b><br/>Control 0.24, 0.70 (-0.05, 0.52)<br/>Neonatal stroke -0.14, 1.03 (-0.73, 0.46) p=0.188</p> <p><b>Speeded naming: correct</b><br/>Control 0.42, 0.41 (0.25, 0.59)<br/>Neonatal stroke -0.45, 1.41 (-1.26, 0.37) p=0.008</p> <p><b>Repetition of nonsense words</b><br/>Control 0.30, 0.53 (0.08, 0.52)<br/>Neonatal stroke -0.40, 1.23 (-1.03, 0.24) p=0.026</p> <p><b>Verbal fluency: semantic</b><br/>Control 0.43, 0.81 (0.13, 0.73)<br/>Neonatal stroke -0.60, 0.95 (-1.04, 0.15) p&lt;0.0001</p> <p><b>Verbal fluency: phonemic</b><br/>Control 0.40, 0.93 (-0.12, 0.92)<br/>Neonatal stroke -0.67, 0.90 (-1.42, 0.08) p=0.008</p> <p><b>Oromotor sequences</b><br/>Control 0.31, 0.64 (0.07, 0.54)<br/>Neonatal stroke -0.52, 1.25 (-1.15, 0.10)</p> <p><b>Sentence comprehension</b><br/>Control 0.19, 0.78 (-0.09, 0.48)<br/>Neonatal stroke -0.35, 1.09 (-0.91, 0.21) p=0.027</p> <p><b>Sensorimotor functions, mean, SD, 95% CI</b></p> <p><b>Finger tapping</b><br/>Control 0.49, 0.33 (0.35, 0.62)<br/>Neonatal stroke -0.53, 1.27 (-1.16, 0.10) p=0.0007</p> <p><b>Imitating hand positions</b><br/>Control 0.57, 0.68 (0.32-0.82)<br/>Neonatal stroke -0.72, 0.92 (-1.14, 0.30) p&lt;0.0001</p> <p><b>Visuomotor precision: time</b><br/>Control 0.13, 0.83 (-0.17, 0.43)<br/>Neonatal stroke -0.24, 0.97 (-0.69, 0.20) p=0.145</p> <p><b>Visuomotor precision: mistakes</b><br/>Control 0.45, 0.50 (0.27, 0.64)<br/>Neonatal stroke -0.42, 1.05 (-0.90, 0.05) p=0.0002</p> <p><b>Manual motor sequences</b><br/>Control 0.50, 0.62 (0.27, 0.73)<br/>Neonatal stroke -0.92, 0.95 (-1.43, 0.41) p&lt;0.0001</p> <p><b>Finger discrimination</b><br/>Control 0.53, 0.57 (0.29, 0.77)<br/>Neonatal stroke -0.77, 1.03 (-1.30, 0.24) p&lt;0.0001</p> <p><b>Visuospatial functions, mean, SD, 95% CI</b></p> <p><b>Design copying</b><br/>Control 0.36, 0.80 (0.06, 0.65)<br/>Neonatal stroke -0.54, 0.97 (-1.0, 0.09) p&lt;0.0001</p> <p><b>Arrows</b><br/>Control 0.37, 0.79 (0.05, 0.70)<br/>Neonatal stroke -0.61, 1.07 (-1.16, 0.06) p=0.0004</p> <p><b>Block construction</b><br/>Control 0.29, 0.81 (-0.01, 0.58)<br/>Neonatal stroke -0.45, 1.04 (-0.92, 0.03) p=0.0003</p> <p><b>Route finding</b><br/>Control 0.25, 1.05 (-0.33, 0.83)<br/>Neonatal stroke -0.66, 0.80 (-1.23, 0.09) p=0.033</p> <p><b>Picture perception</b><br/>Control 0.13, 1.00 (-0.49, 0.24)<br/>Neonatal stroke -0.09, 1.03 (-0.56, 0.37) p=0.341</p> <p><b>Memory and learning, mean, SD, 95% CI</b></p> <p><b>Memory for faces</b><br/>Control 0.42, 0.74 (0.11, 0.73)<br/>Neonatal stroke -0.41, 1.15 (-0.96, 0.15) p=0.016</p> |
|--|--|--|--|--------------------------------------------------------------------------------------------------------------------------------------------------------------------------------------------------------------------------------------------------------------------------------------------------------------------------------------------------------------------------------------------------------------------------------------------------------------------------------------------------------------------------------------------------------------------------------------------------------------------------------------------------------------------------------------------------------------------------------------------------------------------------------------------------------------------------------------------------------------------------------------------------------------------------------------------------------------------------------------------------------------------------------------------------------------------------------------------------------------------------------------------------------------------------------------------------------------------------------------------------------------------------------------------------------------------------------------------------------------------------------------------------------------------------------------------------------------------------------------------------------------------------------------------------------------------------------------------------------------------------------------------------------------------------------------------------------------------------------------------------------------------------------------------------------------------------------------------------------------------------------------------------------------------------------------------------------------------------------------------------------------------------------------------------------------------------------------------------------------------------------------------------------------------------------------------------------------------------------------------------------------------------------------------------------------------------------------------------------------------------------------------------------------------------------------------------------------------------------------------------------------------------------------------------------------------------------------------------------------------------------------------------------------------------------------------------------------------------------------------------------------------------------------------------------------------------------------------------------------------------------------------------------------------------------------------------------------------------------------------------------------------------------------------------------------------------------------------------------------------------------------------------------------------------------------------------------------------------------------------------------------------------------------------------------------------------------|

|    |                                                             |                                                                                                                                                                                                                                                                                                                                                                                                                                                                                                                                                                                                                                                                                                                                                                            |                                                                                                                                                                                                                                                                                                                                                                                                                                                     |                                                                                                                                                                                                                                                                                                                                                                                                                                                                                                                                                                                                                                                                                                                                                                                                                                                                                                                                                             |
|----|-------------------------------------------------------------|----------------------------------------------------------------------------------------------------------------------------------------------------------------------------------------------------------------------------------------------------------------------------------------------------------------------------------------------------------------------------------------------------------------------------------------------------------------------------------------------------------------------------------------------------------------------------------------------------------------------------------------------------------------------------------------------------------------------------------------------------------------------------|-----------------------------------------------------------------------------------------------------------------------------------------------------------------------------------------------------------------------------------------------------------------------------------------------------------------------------------------------------------------------------------------------------------------------------------------------------|-------------------------------------------------------------------------------------------------------------------------------------------------------------------------------------------------------------------------------------------------------------------------------------------------------------------------------------------------------------------------------------------------------------------------------------------------------------------------------------------------------------------------------------------------------------------------------------------------------------------------------------------------------------------------------------------------------------------------------------------------------------------------------------------------------------------------------------------------------------------------------------------------------------------------------------------------------------|
|    |                                                             |                                                                                                                                                                                                                                                                                                                                                                                                                                                                                                                                                                                                                                                                                                                                                                            |                                                                                                                                                                                                                                                                                                                                                                                                                                                     | <p><b>Memory for names</b><br/>Control 0.15, 0.92 (-0.23, 0.53)<br/>Neonatal stroke -0.31, 1.09 (-0.87, 0.25) p=0.295</p> <p><b>Narrative memory</b><br/>Control 0.26, 0.80 (-0.03, 0.55)<br/>Neonatal stroke -0.22, 1.16 (-0.78, 0.34) p=0.077</p> <p><b>Sentence repetition</b><br/>Control 0.49, 0.61 (0.26, 0.71)<br/>Neonatal stroke -0.64, 0.96 (-1.09, 0.19) p&lt;0.0001</p> <p><b>List learning</b><br/>Control 0.30, 0.82 (-0.16, 0.76)<br/>Neonatal stroke -0.38, 1.22 (-1.32, 0.56) p=0.151</p> <p><b>Picture recognition</b><br/>Control 0.39, 0.72 (0.10, 0.69)<br/>Neonatal stroke -0.36, 1.24 (-0.98, 0.25) p=0.027</p> <p><b>Motor (hemiparesis)</b><br/>Neonatal stroke and any hemiparesis n=19, 90%<br/>Mild functional impairment n=6, 29%<br/>Significant functional impairment n= 8, 38%<br/>Very severe functional impairment n= 4, 19%</p> <p><b>Epilepsy</b><br/>Stroke n=9, 33.3%</p>                                             |
| 34 | Martin 2019 <sup>40</sup><br>*<br>USA<br>Prospective cohort | <p><b>Population</b></p> <ul style="list-style-type: none"> <li>Gestation not provided</li> <li>Birth years not provided</li> </ul> <p><b>Exposure (n=21)</b></p> <ul style="list-style-type: none"> <li>Left hemisphere (n=13)</li> <li>Right hemisphere (n=8)</li> </ul> <p><b>Control (n=21)</b></p> <ul style="list-style-type: none"> <li>Matched on age, sex and socioeconomic status</li> <li>Healthy controls</li> <li>Recruited from local community using adverts</li> </ul> <p><b>Ascertainment/ definition</b></p> <ul style="list-style-type: none"> <li>Unilateral focal brain lesion (ischaemic or haemorrhagic thought to have occurred between 28 weeks' gestation and 28 days postnatally)</li> <li>Recruited from a neurologist in San Diego</li> </ul> | <p><b>Outcomes</b></p> <ul style="list-style-type: none"> <li>Hearing</li> <li>Motor (cerebral palsy)</li> <li>Epilepsy</li> </ul> <p><b>Measurement/ assessment</b></p> <ul style="list-style-type: none"> <li>Auditory neglect task</li> </ul> <p><b>Follow-up</b></p> <ul style="list-style-type: none"> <li>6-14 years (mean 9-10 years)</li> <li>Completeness not specified</li> </ul>                                                         | <p><b>Time to correct response</b></p> <p><b>Left sided sound:</b><br/>Left stroke 1550 ms±580 ms<br/>Control 1465 ms±666 ms <i>not significant</i></p> <p>Right stroke 1708 ms±951 ms<br/>Control 1074 ms±514 ms* (p=0.043)</p> <p><b>Right sided sound</b><br/>Left stroke 1595 ms±553 ms<br/>Control 1501 ms±720 ms <i>not significant</i></p> <p>Right stroke 2032 ms±1496 ms<br/>Control 1291 ms±792 ms p=0.118</p> <p><b>Number of correct auditory responses</b></p> <p><b>Left sided sound</b><br/>Left stroke 5.15±1.21<br/>Control 4.62±1.26 p=0.338</p> <p>Right stroke 4.25±1.67<br/>Control 4.63±1.19 p=0.307</p> <p><b>Right sided sound</b><br/>Left stroke 4.31±1.18<br/>Control 4.62±1.71 p=0.3</p> <p>Right stroke 4.50±1.31<br/>Control 5.50±0.92 p=0.05</p> <p><b>Seizures outside of neonatal period</b><br/>Stroke n=4; 19%</p> <p><b>Hemiparesis</b><br/>Stroke n=13, 70%</p> <p>Right stroke n=3, 28%<br/>Left stroke n=10, 77%</p> |
| 35 | Northam 2018 <sup>37</sup><br>UK<br>Prospective cohort      | <p><b>Population</b></p> <ul style="list-style-type: none"> <li>Gestation not provided</li> <li>Born 1991-2001</li> </ul> <p><b>Exposure (n=30)</b></p> <ul style="list-style-type: none"> <li>Perinatal stroke</li> </ul> <p><b>Control (n=40)</b></p> <ul style="list-style-type: none"> <li>Matched on age, sex and maternal education</li> <li>Term infants</li> </ul> <p><b>Ascertainment/ definition</b></p> <ul style="list-style-type: none"> <li>Arterial or ischaemic stroke confirmed by MRI in the neonatal period</li> </ul>                                                                                                                                                                                                                                  | <p><b>Outcomes</b></p> <ul style="list-style-type: none"> <li>Cognitive</li> <li>Speech and language</li> <li>Motor (cerebral palsy)</li> </ul> <p><b>Measurement/ assessment</b></p> <ul style="list-style-type: none"> <li>WASI</li> <li>CELF</li> <li>Comprehensive Test of Phonological Processing</li> </ul> <p><b>Follow-up</b></p> <ul style="list-style-type: none"> <li>6-18 years (mean 12.4 and 13.5)</li> <li>100% follow up</li> </ul> | <p><b>Cognitive</b></p> <p><b>Full scale IQ mean (SD)</b><br/>Stroke 99 (14)<br/>Control 112 (16) p&lt;0.0001</p> <p><b>Mainstream education</b><br/>Stroke n=28, 93%</p> <p><b>Receiving additional education support</b><br/>Stroke n=12, 40%</p> <p><b>Speech and language</b></p> <p><b>Expressive language score, mean (SD)</b><br/>Stroke 95 (17)<br/>Control 108 (13) p=0.001</p> <p><b>Receptive language score, mean (SD)</b><br/>Stroke 91 (16)<br/>Control 104 (14) p &lt; 0.0001</p> <p><b>Motor (hemiparesis)</b><br/>Stroke n=9, 3%</p>                                                                                                                                                                                                                                                                                                                                                                                                       |
| 36 | Tillema 2008 <sup>38</sup><br>USA<br>Retrospective cohort   | <p><b>Population</b></p> <ul style="list-style-type: none"> <li>Gestation not provided</li> <li>Birth years not provided</li> </ul> <p><b>Exposure (n=10)</b></p> <ul style="list-style-type: none"> <li>Left perinatal stroke</li> </ul> <p><b>Control (n=10)</b></p>                                                                                                                                                                                                                                                                                                                                                                                                                                                                                                     | <p><b>Outcomes</b></p> <ul style="list-style-type: none"> <li>Cognitive</li> <li>Epilepsy</li> </ul> <p><b>Measurement/ assessment</b></p> <ul style="list-style-type: none"> <li>WISC-III</li> <li>Language activation tasks – Verb generation task whilst in an fMRI</li> </ul>                                                                                                                                                                   | <p><b>Focal epilepsy</b><br/>Stroke, n=6, 60%</p> <p><b>Cognitive, mean (SD)</b><br/>Stroke VIQ 84 (13.4)<br/>Control VIQ 108 (14.2) p=0.002</p>                                                                                                                                                                                                                                                                                                                                                                                                                                                                                                                                                                                                                                                                                                                                                                                                            |

|                                          |                                                                                                  |                                                                                                                                                                                                                                                                                                                                                                                                                                                                                                                                                                                                                                                                                                                                                                                                                                                                                                                 |                                                                                                                                                                                                                                                                                                                                                                                                                                                                                                                                                                               |                                                                                                                                                                                                                                                                                                                                                                                                                                                                                                                                                                                                                                                                                                                                                                                                                                                                                                                                                                                                                                                                                                                                                                                                     |
|------------------------------------------|--------------------------------------------------------------------------------------------------|-----------------------------------------------------------------------------------------------------------------------------------------------------------------------------------------------------------------------------------------------------------------------------------------------------------------------------------------------------------------------------------------------------------------------------------------------------------------------------------------------------------------------------------------------------------------------------------------------------------------------------------------------------------------------------------------------------------------------------------------------------------------------------------------------------------------------------------------------------------------------------------------------------------------|-------------------------------------------------------------------------------------------------------------------------------------------------------------------------------------------------------------------------------------------------------------------------------------------------------------------------------------------------------------------------------------------------------------------------------------------------------------------------------------------------------------------------------------------------------------------------------|-----------------------------------------------------------------------------------------------------------------------------------------------------------------------------------------------------------------------------------------------------------------------------------------------------------------------------------------------------------------------------------------------------------------------------------------------------------------------------------------------------------------------------------------------------------------------------------------------------------------------------------------------------------------------------------------------------------------------------------------------------------------------------------------------------------------------------------------------------------------------------------------------------------------------------------------------------------------------------------------------------------------------------------------------------------------------------------------------------------------------------------------------------------------------------------------------------|
|                                          |                                                                                                  | <ul style="list-style-type: none"> <li>Matched on age, sex, and handedness</li> <li>Healthy</li> <li>Randomly drawn from a large database of children recruited for a different study of language development in healthy children</li> </ul> <p><b>Ascertainment/ definition</b></p> <ul style="list-style-type: none"> <li>Middle cerebral artery ischaemic stroke</li> </ul>                                                                                                                                                                                                                                                                                                                                                                                                                                                                                                                                  | <p><b>Follow-up</b></p> <ul style="list-style-type: none"> <li>6-16 years</li> <li>100% follow up</li> </ul>                                                                                                                                                                                                                                                                                                                                                                                                                                                                  | Stroke FSIQ 80 (14.1)<br>Control FSIQ 108 (11.7) p=0.001                                                                                                                                                                                                                                                                                                                                                                                                                                                                                                                                                                                                                                                                                                                                                                                                                                                                                                                                                                                                                                                                                                                                            |
| 37                                       | Trauner 2001 <sup>39</sup><br>USA<br>Retrospective cohort                                        | <p><b>Population</b></p> <ul style="list-style-type: none"> <li>Gestation not reported</li> <li>Birth years not reported</li> </ul> <p><b>Exposure (n=39)</b></p> <ul style="list-style-type: none"> <li>Left perinatal stroke (n=25)</li> <li>Right perinatal stroke (n=14)</li> </ul> <p><b>Control (n=54)</b></p> <ul style="list-style-type: none"> <li>Matched on age and socioeconomic status</li> <li>Normal neurodevelopmental history</li> <li>Identified from clinics, community adverts, schools</li> </ul> <p><b>Ascertainment/ definition</b></p> <ul style="list-style-type: none"> <li>Pre or perinatal onset unilateral brain damage (focal lesion) from cerebral infarction or intraparenchymal haemorrhage</li> <li>Identified through from clinical referrals.</li> <li>All confirmed by neuroimaging.</li> <li>Severity rated on 5-point scale adapted from Vargha-Khadem et al.</li> </ul> | <p><b>Outcomes</b></p> <ul style="list-style-type: none"> <li>Behavioural</li> <li>Cognitive</li> <li>Epilepsy</li> </ul> <p><b>Measurement/ assessment</b></p> <ul style="list-style-type: none"> <li>Achenbach CBCL</li> <li>WPPSI-R (4-5 years)</li> <li>WISC-R (6-16 years)</li> </ul> <p><b>Follow-up</b></p> <ul style="list-style-type: none"> <li>4-18 years</li> <li>100% follow up</li> </ul>                                                                                                                                                                       | <p><b>Cognitive</b></p> <p><b>Full scale IQ mean (SD)</b></p> <p>Stroke 93.4 (22)<br/>Control 116.2 (13) p&lt;0.0001</p> <p>Left stroke 90.1 (22)<br/>Right stroke 97.4 (22) – no significant difference</p> <p><b>Seizures (outside of the neonatal period)</b></p> <p>Stroke n=17, 50% (missing data for 5 subjects)</p>                                                                                                                                                                                                                                                                                                                                                                                                                                                                                                                                                                                                                                                                                                                                                                                                                                                                          |
| <b>Central nervous system infections</b> |                                                                                                  |                                                                                                                                                                                                                                                                                                                                                                                                                                                                                                                                                                                                                                                                                                                                                                                                                                                                                                                 |                                                                                                                                                                                                                                                                                                                                                                                                                                                                                                                                                                               |                                                                                                                                                                                                                                                                                                                                                                                                                                                                                                                                                                                                                                                                                                                                                                                                                                                                                                                                                                                                                                                                                                                                                                                                     |
| 38                                       | Bedford 2001 <sup>42</sup><br>England & Wales<br>Prospective cohort                              | <p><b>Population</b></p> <ul style="list-style-type: none"> <li>All gestational ages included</li> <li>Born 1985-1987</li> </ul> <p><b>Exposure (n=274)</b></p> <ul style="list-style-type: none"> <li>Neonatal meningitis</li> </ul> <p><b>Comparison (n=1391)</b></p> <ul style="list-style-type: none"> <li>Matched on age and sex</li> <li>Recruited through GP</li> </ul> <p><b>Ascertainment/ definition</b></p> <ul style="list-style-type: none"> <li>Identified through clinician reporting</li> </ul>                                                                                                                                                                                                                                                                                                                                                                                                 | <p><b>Outcomes</b></p> <ul style="list-style-type: none"> <li>Neuromotor disability (composite)</li> <li>Cognitive</li> <li>Hearing</li> <li>Vision</li> <li>Behaviour</li> <li>Seizure disorder</li> </ul> <p><b>Assessment/ measurement</b></p> <ul style="list-style-type: none"> <li>Parental questionnaire</li> <li>GP questionnaire</li> <li>McIntyre et al. classification of disability severity</li> </ul> <p><b>Follow-up</b></p> <ul style="list-style-type: none"> <li>5 years</li> <li>85-94% follow-up</li> </ul>                                               | <p><b>Neuromotor disability</b></p> <p>Meningitis, n=45, 16%<br/>No meningitis, n=2, 0.1%</p> <p><b>Severe disability</b></p> <p>Meningitis, n=20, 7%<br/>No meningitis, n=1, 0.1%</p> <p><b>Moderate disability</b></p> <p>Meningitis, n=50, 18%<br/>No meningitis, n=20, 1%</p> <p><b>Mild disorder</b></p> <p>Meningitis, n=66, 24%<br/>No meningitis, n=275, 20%</p> <p><b>No disability</b></p> <p>Meningitis, n=138, 50%<br/>No meningitis, n=1095, 79%</p>                                                                                                                                                                                                                                                                                                                                                                                                                                                                                                                                                                                                                                                                                                                                   |
| 39                                       | Horváth-Puhó 2021 <sup>43</sup><br>Denmark and Netherlands<br>Retrospective matched cohort study | <p><b>Population</b></p> <ul style="list-style-type: none"> <li>Gestation not specified</li> <li>Born 1997-2017</li> </ul> <p><b>Exposure</b></p> <ul style="list-style-type: none"> <li>GBS meningitis (Denmark) (n=168)</li> <li>GBS meningitis (Netherlands) (n=198)</li> </ul> <p><b>Comparison</b></p> <ul style="list-style-type: none"> <li>Randomly selected</li> <li>Matched 1:10 on sex, birth year and month, and gestation</li> <li>No GBS (Denmark) (n=13,689)</li> <li>No GBS (Netherlands) (n=4,983)</li> </ul> <p><b>Ascertainment/ definition</b></p> <ul style="list-style-type: none"> <li>Invasive Group B Streptococcal disease by 89 days of age (most were neonatal – hence inclusion)</li> <li>ICD 10 codes (Denmark)</li> <li>CSF culture positive on national laboratory register (Netherlands)</li> </ul>                                                                            | <p><b>Outcomes</b></p> <ul style="list-style-type: none"> <li>Neurodevelopmental impairment (composite)</li> <li>Cognitive</li> <li>Motor</li> <li>Behavioural, mental and social disorders</li> <li>Hearing impairment</li> <li>Visual impairment</li> </ul> <p><b>Assessment/ Measurement</b></p> <ul style="list-style-type: none"> <li>ICD 10 codes</li> </ul> <p><b>Follow-up</b></p> <ul style="list-style-type: none"> <li>Denmark 5 years, 7 years, 10 years, 15 years</li> <li>Netherlands 5 years, 7 years, 10 years and 11 years</li> <li>95% follow-up</li> </ul> | <p><b>Any neurodevelopmental impairment RR (95%CI)</b></p> <p><b>&lt;5 years</b></p> <p>Denmark GBS meningitis 7-80 (4-42-13-77)<br/>Netherlands GBS meningitis 5-30 (2-57-10-89)</p> <p><b>&lt;7 years</b></p> <p>Denmark GBS meningitis 4-69 (2-78-7-89)<br/>Netherlands GBS meningitis 3-71 (1-05-6-72)</p> <p><b>&lt;10 years</b></p> <p>Denmark GBS meningitis 3-47 (2-19-5-50)<br/>Netherlands GBS meningitis 2-81 (1-69-4-68)</p> <p><b>&lt;11 years</b></p> <p>Netherlands GBS meningitis 2-99 (1-83-4-88)</p> <p><b>&lt;15 years</b></p> <p>Denmark GBS meningitis 3-15 (1-82-5-46)</p> <p><b>Moderate to severe neurodevelopmental impairment RR (95%CI)</b></p> <p><b>&lt;5 years</b></p> <p>Denmark GBS meningitis 8-49 (4-28-16-86)<br/>Netherlands GBS meningitis 5-13 (2-24-11-79)</p> <p><b>&lt;7 years</b></p> <p>Denmark GBS meningitis 5-27 (2-80-9-92)<br/>Netherlands GBS meningitis n/a</p> <p><b>&lt;10 years</b></p> <p>Denmark GBS meningitis 3-88 (2-15-6-99)<br/>Netherlands GBS meningitis 3-05 (1-62-5-73)</p> <p><b>&lt;11 years</b></p> <p>Netherlands GBS meningitis 3-34 (1-77-6-33)</p> <p><b>&lt;15 years</b></p> <p>Denmark GBS meningitis 4-52 (2-35-8-67)</p> |
| 40                                       | Martinez-Cruz 2008 <sup>45</sup>                                                                 | <p><b>Population</b></p> <ul style="list-style-type: none"> <li>Gestation &lt; 34 weeks</li> <li>Birthweight &lt;1500g</li> </ul>                                                                                                                                                                                                                                                                                                                                                                                                                                                                                                                                                                                                                                                                                                                                                                               | <p><b>Outcomes</b></p> <ul style="list-style-type: none"> <li>Sensorineural hearing loss</li> </ul>                                                                                                                                                                                                                                                                                                                                                                                                                                                                           | <p><b>Meningitis</b></p> <p>Sensorineural hearing loss: n=15; 10.3%<br/>No Sensorineural hearing loss: n=7; 2.6%</p>                                                                                                                                                                                                                                                                                                                                                                                                                                                                                                                                                                                                                                                                                                                                                                                                                                                                                                                                                                                                                                                                                |

|                                  |                                                                                 |                                                                                                                                                                                                                                                                                                                                                                                                                                                                                                                                                                        |                                                                                                                                                                                                                                                                                                                                                                                                                                                                                                                                                   |                                                                                                                                                                                                                                                                                                                                                                                                                                                                                                                                                                                                                                                                                                                                                                                                                                                                                                                                                                                                                                                                                                                                                                                                                                                                                                                                                                                                                                                                                                                                                                                       |
|----------------------------------|---------------------------------------------------------------------------------|------------------------------------------------------------------------------------------------------------------------------------------------------------------------------------------------------------------------------------------------------------------------------------------------------------------------------------------------------------------------------------------------------------------------------------------------------------------------------------------------------------------------------------------------------------------------|---------------------------------------------------------------------------------------------------------------------------------------------------------------------------------------------------------------------------------------------------------------------------------------------------------------------------------------------------------------------------------------------------------------------------------------------------------------------------------------------------------------------------------------------------|---------------------------------------------------------------------------------------------------------------------------------------------------------------------------------------------------------------------------------------------------------------------------------------------------------------------------------------------------------------------------------------------------------------------------------------------------------------------------------------------------------------------------------------------------------------------------------------------------------------------------------------------------------------------------------------------------------------------------------------------------------------------------------------------------------------------------------------------------------------------------------------------------------------------------------------------------------------------------------------------------------------------------------------------------------------------------------------------------------------------------------------------------------------------------------------------------------------------------------------------------------------------------------------------------------------------------------------------------------------------------------------------------------------------------------------------------------------------------------------------------------------------------------------------------------------------------------------|
|                                  | Mexico<br>Retrospective case control                                            | <ul style="list-style-type: none"> <li>Born 1990-2005</li> </ul> <p><b>Exposure (n=22)</b></p> <ul style="list-style-type: none"> <li>Neonatal meningitis</li> </ul> <p><b>Comparator (n=374)</b></p> <ul style="list-style-type: none"> <li>No meningitis</li> </ul> <p><b>Ascertainment/ definition</b></p> <ul style="list-style-type: none"> <li>Meningitis not defined</li> </ul>                                                                                                                                                                                 | <p><b>Assessment/ measurement</b></p> <ul style="list-style-type: none"> <li>Brainstem Auditory Evoked Potentials</li> <li>Transient Auditory Evoked Otoacoustic Emissions</li> <li>Tympanometry</li> <li>Free Field Audiometry</li> <li>Pure tone audiometry</li> <li>Behavioural hearing evaluation</li> </ul> <p><b>Follow-up</b></p> <ul style="list-style-type: none"> <li>7-11 years</li> <li>100% follow-up</li> </ul>                                                                                                                     | <p><b>Odds of previous neonatal meningitis if sensorineural hearing loss</b><br/>OR 4.368, 95% CI (1.7, 10.9) p= 0.002</p>                                                                                                                                                                                                                                                                                                                                                                                                                                                                                                                                                                                                                                                                                                                                                                                                                                                                                                                                                                                                                                                                                                                                                                                                                                                                                                                                                                                                                                                            |
| 41                               | Stevens 2003 <sup>41</sup><br>England & Wales<br>Prospective cohort study       | <p><b>Population</b></p> <ul style="list-style-type: none"> <li>Term born infants</li> <li>Born 1985-1987</li> </ul> <p><b>Exposure (n=111)</b></p> <ul style="list-style-type: none"> <li>Meningitis</li> </ul> <p><b>Comparison (n=162)</b></p> <ul style="list-style-type: none"> <li>Matched on hospital of birth, birthweight and sex</li> <li>Hospital control (n=113)</li> <li>GP control (n=49)</li> </ul> <p><b>Ascertainment/ definition</b></p> <ul style="list-style-type: none"> <li>CSF positive culture</li> </ul>                                      | <p><b>Outcomes</b></p> <ul style="list-style-type: none"> <li>Disability and functional impairment (composite)</li> <li>Cognitive</li> <li>Motor</li> <li>Vision</li> <li>Hearing</li> </ul> <p><b>Assessment/ measurement</b></p> <ul style="list-style-type: none"> <li>WISC-III</li> <li>Movement ABC</li> <li>Blinded examination</li> <li>Hearing screening</li> <li>Sonksen-Silver acuity system</li> </ul> <p><b>Follow-up</b></p> <ul style="list-style-type: none"> <li>9-10 years</li> <li>67% follow-up of meningitis group</li> </ul> | <p><b>Cognitive</b><br/><b>IQ, mean (95% CI)</b><br/>Meningitis, 88.8 (85, 92)<br/>Hospital control, 99.4 (97, 102)<br/>GP control, 99.6 (95, 103)</p> <p><b>Motor</b><br/><b>mABC score, mean (95% CI)</b><br/>Meningitis 7.1 (5.9, 8.5)<br/>Hospital controls 5.0 (4.3, 5.8)<br/>GP controls 4.0 (2.9, 5.4)</p> <p><b>Severe disability/ functional impairment</b><br/>Meningitis, n=12, 10.8%<br/>Hospital control, n=0, 0%<br/>GP control, n=0, 0%</p> <p><b>Moderate disability/ functional impairment</b><br/>Meningitis, n=10, 9%<br/>Hospital control, n=2, 1.8%<br/>GP control, n=0, 0%</p> <p><b>Mild disability/ functional impairment</b><br/>Meningitis, n=19, 17.1%<br/>Hospital control, n=13, 11.5%<br/>GP control, n=8, 16%</p> <p><b>No disability or functional impairment</b><br/>Meningitis, n=70, 63.1%<br/>Hospital control, n=98, 86.7%<br/>GP control, n=41, 84%</p> <p><b>Hearing loss (unilateral or bilateral sensorineural hearing loss or requiring hearing aids)</b><br/>Meningitis, n=4, 3.6%<br/>Hospital control, n=0, 0%<br/>GP control, n=0, 0%</p> <p><b>Visual impairment (bilateral)</b><br/>Meningitis, n= 18, 17% (6 unassessed because of their disability)<br/>Hospital control, n=21, 18.5%<br/>GP control, n=4, 8%</p> <p><b>Visual impairment (unilateral)</b><br/>Meningitis, n= 10, 9.9% (6 unassessed because of their disability)<br/>Hospital control, n=8, 7%<br/>GP control, n=2, 4%</p> <p><b>Seizures outside of the neonatal period</b><br/>Meningitis, n=6, 5.4%<br/>Hospital control, n=2, 1.8%<br/>GP control, n=0, 0%</p> |
| Hypoxic-ischaemic encephalopathy |                                                                                 |                                                                                                                                                                                                                                                                                                                                                                                                                                                                                                                                                                        |                                                                                                                                                                                                                                                                                                                                                                                                                                                                                                                                                   |                                                                                                                                                                                                                                                                                                                                                                                                                                                                                                                                                                                                                                                                                                                                                                                                                                                                                                                                                                                                                                                                                                                                                                                                                                                                                                                                                                                                                                                                                                                                                                                       |
| 42                               | 3383 Koc 2016 <sup>24</sup><br>Turkey<br>Retrospective cohort                   | <p><b>Population</b></p> <ul style="list-style-type: none"> <li>Gestation &lt; 32 weeks</li> <li>Birthweight &lt; 1500g</li> <li>Born 2001</li> </ul> <p><b>Exposure (n=9)</b></p> <ul style="list-style-type: none"> <li>Perinatal asphyxia</li> </ul> <p><b>Comparator (n=81)</b></p> <ul style="list-style-type: none"> <li>No asphyxia</li> </ul> <p><b>Ascertainment/ definition</b></p> <ul style="list-style-type: none"> <li>Perinatal asphyxia diagnosed on: fetal pH, Apgar score, and neonatal cerebral and multiorgan dysfunction</li> </ul>               | <p><b>Outcomes</b></p> <ul style="list-style-type: none"> <li>Cognitive</li> </ul> <p><b>Assessment/ measurement</b></p> <ul style="list-style-type: none"> <li>WISC-R</li> <li>Performed by blinded psychologist</li> </ul> <p><b>Follow-up</b></p> <ul style="list-style-type: none"> <li>5-8 years</li> <li>100% follow-up</li> </ul>                                                                                                                                                                                                          | <p><b>Cognitive</b><br/><b>WISC-R IQ Score (combined verbal and performance scores) &lt;85</b><br/>Perinatal asphyxia n=8, 89%<br/>No asphyxia n=24, 30%<br/>p=0.001</p>                                                                                                                                                                                                                                                                                                                                                                                                                                                                                                                                                                                                                                                                                                                                                                                                                                                                                                                                                                                                                                                                                                                                                                                                                                                                                                                                                                                                              |
| 43                               | Lee-Kelland 2019 <sup>46*</sup><br>United Kingdom<br>Retrospective cohort study | <p><b>Population</b></p> <ul style="list-style-type: none"> <li>Gestation ≥ 36 weeks</li> <li>Born 2008-2010</li> </ul> <p><b>Exposure (n=29)</b></p> <ul style="list-style-type: none"> <li>Moderate-severe HIE without subsequent cerebral palsy</li> </ul> <p><b>Comparator (n=20)</b></p> <ul style="list-style-type: none"> <li>Matched on age, sex and social class</li> <li>Born without HIE</li> </ul> <p><b>Ascertainment/ definition</b></p> <ul style="list-style-type: none"> <li>Received therapeutic hypothermia based on TOBY trial criteria</li> </ul> | <p><b>Outcomes</b></p> <ul style="list-style-type: none"> <li>Cognitive</li> <li>Motor</li> <li>Speech and language</li> <li>Behaviour</li> </ul> <p><b>Assessment/ measurement</b></p> <ul style="list-style-type: none"> <li>WISC IV (blinded)</li> <li>Movement ABC 2</li> <li>Strengths and difficulties questionnaire</li> </ul> <p><b>Follow-up</b></p> <ul style="list-style-type: none"> <li>6-8 years</li> <li>61% follow-up</li> </ul>                                                                                                  | <p><b>Cognitive</b><br/><b>Full scale IQ, mean (SD)</b><br/>HIE 91 (10.37)<br/>No HIE 105 (13.41)<br/>Mean difference -13.62 95% CI (-20.53 to -6.71) p&lt;0.001</p> <p><b>Perceptual reasoning, mean (SD)</b><br/>HIE 89 (11.15)<br/>No HIE 103 (12.49)<br/>Mean difference -13.9 95% CI (-20.78 to -7.09) p&lt;0.001</p> <p><b>Working memory, mean (SD)</b><br/>HIE 94 (13.76)<br/>No HIE 102 (13.82)<br/>Mean difference -8.2 95% CI (-16.29 to -0.17) p=0.04</p>                                                                                                                                                                                                                                                                                                                                                                                                                                                                                                                                                                                                                                                                                                                                                                                                                                                                                                                                                                                                                                                                                                                 |

|    |                                                                                       |                                                                                                                                                                                                                                                                                                                                                                                                                                                                                                                                                                                                                                                        |                                                                                                                                                                                                                                                                                                                                                                                                                                 |                                                                                                                                                                                                                                                                                                                                                                                                                                                                                                                                                                                                                                                                                                                                                                                                                                                                                                                                                                                                                                                                                                                                                                                                                                                                                                                                                                                                           |
|----|---------------------------------------------------------------------------------------|--------------------------------------------------------------------------------------------------------------------------------------------------------------------------------------------------------------------------------------------------------------------------------------------------------------------------------------------------------------------------------------------------------------------------------------------------------------------------------------------------------------------------------------------------------------------------------------------------------------------------------------------------------|---------------------------------------------------------------------------------------------------------------------------------------------------------------------------------------------------------------------------------------------------------------------------------------------------------------------------------------------------------------------------------------------------------------------------------|-----------------------------------------------------------------------------------------------------------------------------------------------------------------------------------------------------------------------------------------------------------------------------------------------------------------------------------------------------------------------------------------------------------------------------------------------------------------------------------------------------------------------------------------------------------------------------------------------------------------------------------------------------------------------------------------------------------------------------------------------------------------------------------------------------------------------------------------------------------------------------------------------------------------------------------------------------------------------------------------------------------------------------------------------------------------------------------------------------------------------------------------------------------------------------------------------------------------------------------------------------------------------------------------------------------------------------------------------------------------------------------------------------------|
|    |                                                                                       |                                                                                                                                                                                                                                                                                                                                                                                                                                                                                                                                                                                                                                                        |                                                                                                                                                                                                                                                                                                                                                                                                                                 | <p><b>Processing speed, mean (SD)</b><br/>HIE 96 (13.76)<br/>No HIE 107 (17.59)<br/>Mean difference -11.6 95% CI (-20.69 to -2.47) p=0.01</p> <p><b>Additional classroom support</b><br/>HIE n=10, 34%<br/>No HIE n=1, 5%<br/>OR: 10.0, 95%CI 1.16 to 86.0</p> <p><b>Special educational needs</b><br/>HIE n=1, 3.4%<br/>No HIE n=0, 0%</p> <p><b>Motor</b><br/><b>MABC-2 score, mean (SD)</b><br/>HIE 7.9 (3.26)<br/>No HIE 10.2 (2.86)<br/>Mean difference -2.12 95% CI (-3.93 to -0.30) p=0.02</p> <p><b>Speech and language</b><br/><b>Verbal comprehension, mean (SD)</b><br/>HIE 94 (8.79)<br/>No HIE 103 (10.09)<br/>Mean difference -8.8 95% CI (-14.25 to -3.34) p=0.002</p> <p><b>Behaviour</b><br/><b>Total difficulties, median (IQR)</b><br/>HIE 12 (6.5-13.5)<br/>No HIE 6 (2.25-10) P=0.005</p> <p><b>Emotional problems, median (IQR)</b><br/>HIE 2 (1-4.5)<br/>No HIE 0.5 (0-2.75) P=0.03</p> <p><b>Hyperactivity, median (IQR)</b><br/>HIE 2 (1-3)<br/>No HIE 1 (0-2) P=0.06</p> <p><b>Conduct problems, median (IQR)</b><br/>HIE 4 (2.5-6.5)<br/>No HIE 3 (1-5) p=0.06</p> <p><b>Peer problems, median (IQR)</b><br/>HIE 0 (0-2.5)<br/>No HIE 0 (0-1) p=3.56 Ω (potential error in manuscript table)</p> <p><b>Prosocial, median (IQR)</b><br/>HIE 9 (7.5-10)<br/>No HIE 9 (8.25-10) p=0.13</p> <p><b>Impact score, median (IQR)</b><br/>HIE 0 (0-2.5)<br/>No HIE 0 (0-2.0) p=0.31</p> |
| 44 | <p>Tonks 2019<sup>47</sup>*</p> <p>United Kingdom</p> <p>Prospective cohort study</p> | <p><b>Population</b></p> <ul style="list-style-type: none"> <li>Gestation ≥36 weeks</li> <li>Born 2008-2011</li> <li>English as primary language</li> </ul> <p><b>Exposure (n=29)</b></p> <ul style="list-style-type: none"> <li>Moderate-severe HIE without subsequent cerebral palsy</li> </ul> <p><b>Comparator (n=20)</b></p> <ul style="list-style-type: none"> <li>Matched on age, sex and social class</li> <li>Recruited from schools in the area</li> <li>Born without HIE</li> </ul> <p><b>Ascertainment/ definition</b></p> <ul style="list-style-type: none"> <li>Received therapeutic hypothermia based on TOBY trial criteria</li> </ul> | <p><b>Outcomes</b></p> <ul style="list-style-type: none"> <li>Cognitive</li> <li>Neuropsychological</li> </ul> <p><b>Assessment/ measurement</b></p> <ul style="list-style-type: none"> <li>Conner's continuous performance test</li> <li>NEPSY-II block construction test</li> <li>NEPSY-II arrows' test</li> </ul> <p><b>Follow-up</b></p> <ul style="list-style-type: none"> <li>6-8 years</li> <li>77% follow-up</li> </ul> | <p><b>Attention</b><br/><b>Hit response time</b><br/><b>HIE</b><br/>84.1 percentile mean rank 27;<br/>Proportion performing below 2 SD 32%</p> <p><b>Comparator</b><br/>67.3 percentile mean rank 17.89; p = .024<br/>Proportion performing below 2 SD 11%</p> <p><b>Hit response time standard error</b><br/><b>HIE</b><br/>standard error mean rank 26.8<br/>Proportion performing below 2 SD 18%</p> <p><b>Comparator</b><br/>standard error mean rank 18.2; p = 0.032<br/>Proportion performing below 2 SD 11%</p> <p><b>Hit response time by block</b><br/><b>HIE</b><br/>Mean 49.1, SD 23.9</p> <p><b>Comparator</b><br/>Mean 61.9, SD 18.4; p = 0.047</p> <p><b>Visual discrimination</b><br/><b>HIE</b><br/>Below 1 SD 10%</p> <p><b>Comparator</b><br/>Below 1 SD 5%<br/>HIE vs comparator scores, p = 0.049</p> <p><b>Visuo-spatial mental rotation task</b><br/><b>HIE</b><br/>Below 1 SD 17%</p> <p><b>Comparator</b><br/>Below 1 SD 5%<br/>HIE vs comparator scores, p = 0.034</p>                                                                                                                                                                                                                                                                                                                                                                                                           |
