# Supplementary material for: School-age outcomes of children after perinatal brain injury: a systematic review and meta-analysis
Source: PubMed Central journal article supplement (PMC10255042; doi:10.1136/bmjpo-2022-001810), 2023-06-02

| Study            | Events | Total | Incidence    | 95% CI                | Weight        |
|------------------|--------|-------|--------------|-----------------------|---------------|
| Ballantyne, 2008 | 11     | 29    | 0.379        | [0.207; 0.577]        | 22.2%         |
| Kolk, 2011       | 9      | 21    | 0.429        | [0.218; 0.660]        | 19.0%         |
| Martin, 2019     | 4      | 21    | 0.190        | [0.054; 0.419]        | 23.1%         |
| Tilema, 2008     | 6      | 10    | 0.600        | [0.262; 0.878]        | 12.5%         |
| Trauner, 2001    | 17     | 34    | 0.500        | [0.324; 0.676]        | 23.1%         |
| <b>Overall</b>   |        |       | <b>0.401</b> | <b>[0.268; 0.533]</b> | <b>100.0%</b> |

$I^2 = 56\%$ ,  $\tau^2 = 0.0124$ ,  $p = 0.06$

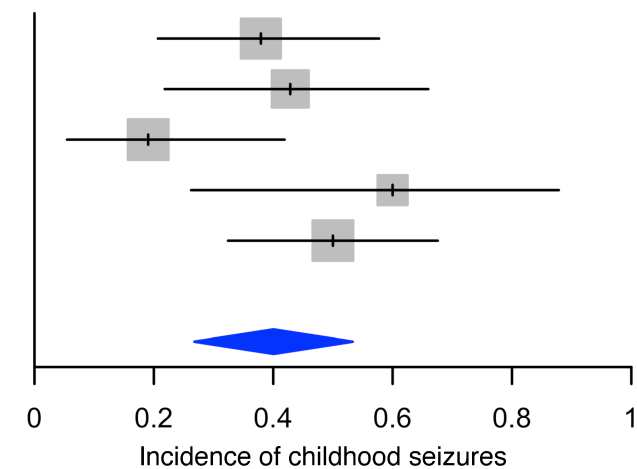

Supplement: bmjpo-2022-001810supp005.pdf [file bmjpo-2022-001810supp005.pdf]
