# Supplementary material for: School-age outcomes of children after perinatal brain injury: a systematic review and meta-analysis
Source: PubMed Central journal article supplement (PMC10255042; doi:10.1136/bmjpo-2022-001810), 2023-06-02
Supplement: bmjpo-2022-001810supp006.pdf [file bmjpo-2022-001810supp006.pdf]

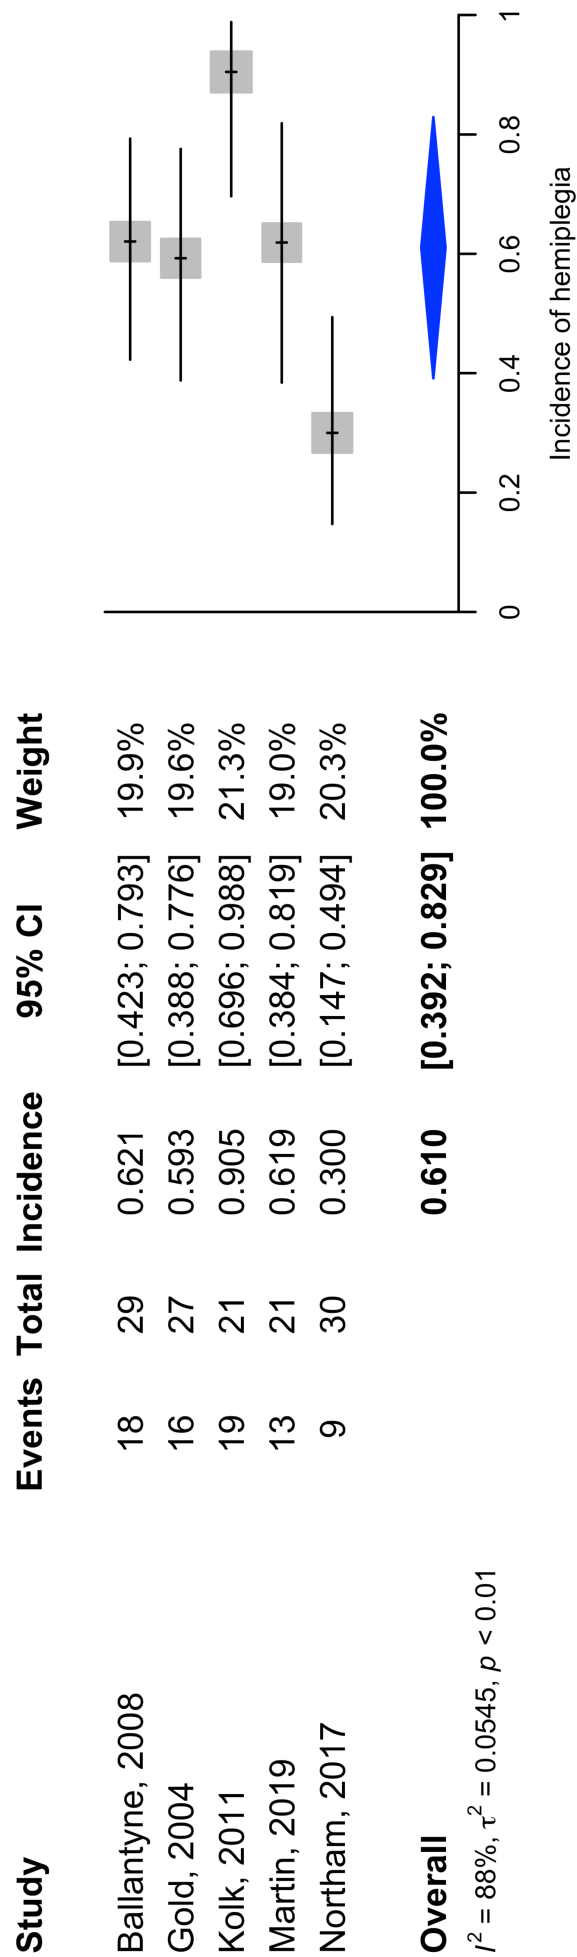

$I^2 = 88\%$ ,  $\tau^2 = 0.0545$ ,  $p < 0.01$
