# Supplementary material for: School-age outcomes of children after perinatal brain injury: a systematic review and meta-analysis
Source: PubMed Central journal article supplement (PMC10255042; doi:10.1136/bmjpo-2022-001810), 2023-06-02

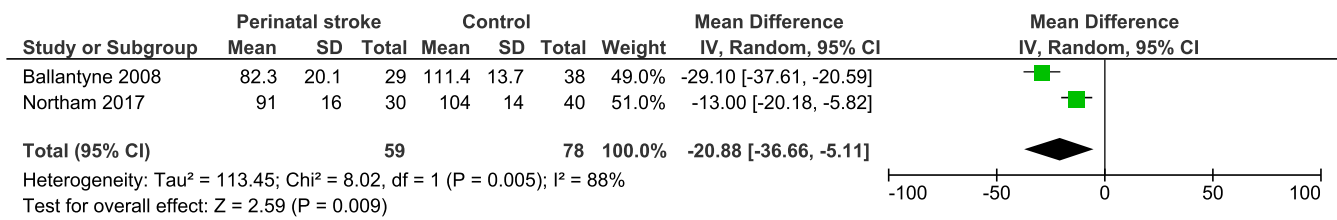

Supplement: bmjpo-2022-001810supp007.pdf [file bmjpo-2022-001810supp007.pdf]
